# Supplementary material
Source: PubMed Central journal article supplement (PMC8666591)
Supplement: NIHMS1748325-supplement-316311_Online.pdf [file NIHMS1748325-supplement-316311_Online.pdf]

# Supplemental Material

## Expanded Materials & Methods

### Cell culture

H9C2 cells (American Type Culture Collection) were cultured in high-glucose Dulbecco's Modified Eagle Medium (DMEM) supplemented with fetal calf serum (10%), 2 mM of L-glutamine, 100 U/mL of penicillin and 100 g/mL of streptomycin at 37 °C in 5% CO<sub>2</sub>. Only cells with a low number of passages (6-10) were used for the experiments.

### Animals

All rats were treated according to the Guide for the Care and Use of Laboratory Animals published by the US National Institutes of Health (NIH publication no. 85–23, revised 1996) and approved by the Institutional Laboratory Animal Care and Use Committee of the NIH, Bethesda, MD, USA.

Male Dahl SS rats (Charles River, Wilmington, MA) were either switched from a low salt diet (0.3% NaCl) to a high salt diet (8% NaCl) (diastolic dysfunction) or kept at low salt diet (control) at 7 weeks of age. After 6-7 weeks, rats with induced diastolic dysfunction were randomly assigned to allogeneic CDC treatment (injection of  $5 \times 10^5$  cells re-suspended in 100  $\mu$ l phosphate buffered saline (PBS, pH 7.4) or vehicle (PBS). Animals unable to move, drink and eat (as assessed by an animal technician not involved in the study and not aware of the treatment) before onset of CDC or placebo treatment were euthanized and recorded as dead in order to comply with institutional animal welfare policy and excluded from experiments. Further, only animals that were showing pathophysiological symptoms of HFpEF (no reduction of ejection fraction with clear signs of diastolic dysfunction) in echo readings were included into the study. CDCs were generated from explanted Wistar-Kyoto rat hearts (Charles River, Wilmington, MA) hearts. Endomyocardial biopsies from the right ventricle were obtained from the septal wall. Samples were cut into fragments, washed and partially digested enzymatically. The tissue fragments were cultured on dishes coated with fibronectin and once confluent, the cells surrounding the explants were harvested by gentle enzymatic digestion. These cardiosphere-forming cells were seeded at 2 to  $3 \times 10^4$  cells/mL on poly-d-lysine-coated dishes in cardiosphere medium containing 35% IMDM and 65% DMEM/F-12 Mix (Invitrogen), 3.5% FBS, 1% penicillin-streptomycin, 1% L-glutamine, 0.1mM 2-mercaptoethanol, thrombin, B-27, bFGF, EGF, and Cardiotrophin-1 at final working concentrations. Several days later, detached cardiospheres were plated on fibronectin-coated flasks and expanded. CDCs were subsequently passaged by

trypsinization and splitting at a 1:2 ratio. Isolation of the cardiosphere-forming cells was repeated up to 3 more times from the same specimen.

Echocardiography and/or hemodynamic measurements were performed to characterize heart phenotypes 4 weeks after treatment (24).

### **Sample handling and preparation for proteomics**

Freshly harvested rat left ventricle (LV) tissue was shortly rinsed in ice-cold homogenization buffer (300 mM sucrose, 250 mM HEPES-NaOH, 1 mM EDTA, pH 8.0) supplemented with a broad-spectrum protease inhibitor (Thermo Fisher Scientific, Waltham, MA) for total protein analysis, or phosphatase inhibitor cocktail (Thermo Fisher Scientific) for protein phosphorylation analysis. Samples were snap frozen in liquid nitrogen. Left ventricle tissue was fractionated into cytosolic-, myofilament-, and in-soluble-enriched fractions by the “in sequence” method. The left ventricle was cryohomogenized at an approximate ratio of tissue weight: buffer volume 1:4 in homogenization buffer for 1 min with a frequency of 30/s. Following centrifugation at 14,000 g for 10 min at 4°C supernatant was kept at 4°C (cytosolic fraction) the pellet was resuspended in 1:4 homogenization buffer with 1% trifluoroacetic acid (TFA) and cryohomogenized. Following centrifugation at 14,000 g for 10 min at 4°C supernatant was kept at 4°C (membrane fraction) and pellet was resuspended in 1:4 homogenization buffer with 2% SDS and cryohomogenized for receiving the in-soluble fraction. In order to cheer the DNA, the in-soluble fraction was sonication for 10 min with 10 sec on/off with an amplitude of 70% at 4°C with a Q800R3 Sonicator (QSonica, Newtown, CT) and DNA was pelleted by centrifugation at 14,000 g for 10 min at 4°C. Protein concentration was determined by BCA (Pierce, Waltham, MA). Quantification of total peptides and quantification of phospho-enriched peptides were performed in separate MS runs due to enrichment required for isolation of the phospho-peptides. One hundred µg of each fraction (total protein quantification) or 1 mg of protein of each fraction (phosphorylation quantification) were reduced using 1 mM TCEP. Sample clean-up and alkylation, filter-aided sample preparation (FASP 10 kDA, Promega, Madison, WI) was used. Samples were digested for 15–18h at 37°C using ultra-grade Trypsin (Promega) at a 1:100 enzyme: protein ratio. Samples were desalted using Oasis HLB plates (30 µm and 5 mg sorbent, Waters Milford, MA), vacuum dried and stored at -80°C until analysis. For analyzing phosphorylated peptides, samples were enriched post-digestion using TiO<sub>2</sub> beads. Digestion was stopped by the addition of FA to 0.1% final concentration. Each sample was desalted using an Oasis HLB plate with 5 mg sorbent per Well (Waters, Milford, MA) and peptides were eluted in TiO<sub>2</sub> starting buffer containing

80% ACN, 5% TFA, and 1M glycolic acid. TiO<sub>2</sub> enrichment solution containing 15 mg of TiO<sub>2</sub> beads per 1 mL of TiO<sub>2</sub> start buffer was added to the samples and incubated for 2h at room temperature with shaking. Samples were then quickly spun in a centrifuge to pellet the TiO<sub>2</sub> beads and the supernatant was removed. Beads were then washed three times with 80% ACN, 5% TFA and once with 80% ACN, 0.1% TFA. Phosphopeptides were eluted with 10% ACN, 3% NH<sub>4</sub>OH (pH ~10) with shaking for 10 min at room temperature. After centrifugation, the pH of the supernatant containing the phosphopeptides was acidified with 0.5% TFA and desalted using Oasis HLB plates with 30 µm sorbent per well (Waters, Milford, MA). Peptides were eluted in 70% ACN, 0.1% FA), vacuum dried and stored at -80°C until analysis.

Additionally, in-gel digestion of the titin band cut from a 4% SDS Coomassie Blue stained gel was performed. The gels were loaded with 400 µg protein and selectively the titin bands were cut into small pieces and transferred to a tube. Gel pieces were washed 3 times with 25mM NH<sub>4</sub>HCO<sub>3</sub>/50% ACN and vacuum dried. Dried gel pieces were covered with 10 mM DTT in 25 mM NH<sub>4</sub>HCO<sub>3</sub> and incubated at 56°C for 1h. Supernatant was removed, gel pieces were covered with 55 mM iodoacetamide in 25 mM NH<sub>4</sub>HCO<sub>3</sub> and incubated in the dark for 45 min at room temperature. The digested peptides were extracted from the gel by adding 1:2 (vol/vol) 5% formic acid/acetonitrile. Supernatant was removed and gels were washed with 100 µl 25 mM NH<sub>4</sub>HCO<sub>3</sub> and mixed for 10 min. Supernatant was removed and gels were washed with 100 µl 25 mM NH<sub>4</sub>HCO<sub>3</sub> and mixed for 10 min. Gels were dehydrated by covering pieces with 25 mM NH<sub>4</sub>HCO<sub>3</sub> in 50% ACN twice with each 5 min mixing. Gel pieces were vacuum dried rehydrated for 10 min with 25 mM NH<sub>4</sub>HCO<sub>3</sub> at 4°C and then digested with either 2.5 µg LysC or Trypsin. Digest solution was transferred into a clean tube. Gel pieces were washed twice with 50% ACN/5% formic acid, mixed for 20 min each and extracted digests vacuum dried to reduce volume to 10 µL. Digests were combined, desalted, vacuum dried, and stored at -80°C until analysis.

Samples obtained from cell culture were lysed in 8 M Urea in 50 mM Ammonium bicarbonate and sonicated with 70% amplitude for 10 min. Prior to reduction, alkylation and digestion, Urea was diluted with 5 times volume of buffer.

### **Western blot**

Quantification of PKC isoforms, phosphorylation, and PKC regulator changes among treatment groups was performed by western blot analysis. A total of 30 µg of LV rat tissue was minced and lysed in 2% SDS using a

glass homogenizer. Cell debris was pelleted at 13,000g for 10 min at 4°C. Protein concentration of supernatants was estimated using the BCA assay using BSA as a standard. Samples were separated by electrophoresis on a 4–10% gradient Bis–Tris SDS-Gels (Bio-Rad, Hercules, CA) and transferred to PVDF membranes. Protein transfer was controlled by membrane staining with direct blue. After blocking, membranes were incubated with primary antibodies. The corresponding IgG HRP-conjugate combined with chemiluminescent substrate (Bio-Rad) and was scanned by a luminescent image quantifier (ImageQuant LAS 4000, GE Healthcare, Chicago, IL).

### ***In vitro* PKC kinase assay**

The phosphorylation sites that were changed in HFpEF rats and with CDC treatment which contain a consensus sequence for PKC were confirmed by *in vitro* experiments. Before adding recombinant kinase, a buffer exchange on LV lysate from control (low salt diet) was performed using FASP 100 kDA filter columns (Promega). Then 10 µmol of recombinant kinase PKC  $\alpha$ ,  $\beta$ I, and  $\delta$  was incubated with 500 µg of protein in kinase buffer (20 mM HEPES, 10 mM MgCl<sub>2</sub>, 100 µM MgCl<sub>2</sub>, pH 7.4) with 100 µM ATP (Promega) at 30°C for 30 min. Following another buffer exchange, the samples were reduced, alkylated and digested in 50 mM ammonium bicarbonate as described above. Ten percent of the digested sample was taken as loading control and 90% was assigned to enrichment for MS quantification of phosphorylation.

### **PKC inhibition in hypertrophic H9C2 cells**

The phosphorylation sites that were changed in HFpEF rats and with CDC treatment which contain a consensus sequence for PKC were confirmed by *in vitro* experiments. H9C2 cells were starved for 24h before inducing hypertrophy for 48 h by adding 50 µM phenylephrine hydrochloride or PBS. Following, cells were treated with 2 nm 1,2,3,4-Tetrahydro Staurosporine (PKC $\alpha$  inhibitor, Santa Cruz Biotechnology), PKC $\beta$  Inhibitor (CAS 257879-35-9, Santa Cruz Biotechnology), 1 µM Rottlerin (PKC  $\delta$  inhibitor, Santa Cruz Biotechnology), 2.3 µM Bisindolylmaleimide VIII (selective protein kinase C, Santa Cruz Biotechnology), 12 µM C-1 (PKA and PKC inhibitor, Tocris), or DMSO for 30 min, washed 3 times with PBS and cell pellets were snap frozen. Samples were stored at -80°C until sample preparation for MS quantification of phosphorylation and total protein was carried out.

### **PKC overexpression in H9C2 cells**

The phosphorylation sites that were changed in HFpEF rats and with CDC treatment which contain a consensus sequence for PKC were confirmed by *in vitro* experiments. The PKC isoforms ( $\alpha$  and  $\beta$ ) and/or the two PKC regulators (Pdlim5 and Ldb3) were overexpressed in H9C2 cells to confirm PKC phosphorylated sites. H9C2 cells were transfected using Lipofectamine<sup>®</sup> 3000 Reagent (Thermo Fisher Scientific) according to the manual instructions with 5  $\mu$ g of the following constructs: Rattus norvegicus protein kinase C, alpha (Prkca), mRNA (NM\_001105713.1, GenScript), Rattus norvegicus protein kinase C, beta (Prkcb), transcript variant 1, mRNA (NM\_012713.4, GenScript), Rattus norvegicus protein kinase C, beta (Prkcb), transcript variant 2, mRNA (NM\_001172305.1, GenScript), Rattus norvegicus LIM domain binding 3 (Ldb3), transcript variant 1, mRNA (NM\_001277165.1, GenScript), and Rattus norvegicus PDZ and LIM domain 5 (Pdlim5), mRNA (NM\_053326.1, GenScript) inserted in pcDNA3.1+/C-(K)DYK vector. When a combination of two constructs was co-transfected the amount of plasmid was adjusted to a final concentration of 5  $\mu$ g. As a negative control, cells were transfected with an empty vector. Efficiency of transfections was analyzed by western blot.

### **PKC co-immunoprecipitations**

PKC co-immunoprecipitations from 200  $\mu$ g LV rat lysate were carried out for total PKC and each isoform  $\alpha$ ,  $\beta$ , and  $\delta$  using the above listed antibodies and dynabeads Protein G (Invitrogen Waltham, MA). The immunoprecipitation was performed according to the user manual.

### **Antibodies**

The following antibodies were used in this study: mouse monoclonal anti-PKC  $\alpha$  (H-7) (sc-8393, Santa Cruz Biotechnology, Dallas, TX), mouse monoclonal anti-PKC  $\beta$  (E-3) (sc-8049, Santa Cruz Biotechnology), mouse monoclonal anti-PKC  $\delta$  (G-9) (sc-8402, Santa Cruz Biotechnology), rabbit anti-phospho-PKC $\alpha/\beta$  II (Thr638/641) (9375, Cell Signaling, Danvers, MA), rabbit anti-Phospho-PKC $\delta$  (Thr505) (9374, Cell Signaling), rabbit anti-Phospho-PKC (pan) ( $\beta$ II Ser660) (9371, Cell Signaling), mouse monoclonal anti-HSPB2 (6) (sc-136339, Santa Cruz Biotechnology), mouse monoclonal anti-Pdlim5 (G-2) (sc-515621, Santa Cruz Biotechnology), and normal mouse IgG antibody (sc-2025, Santa Cruz Biotechnology used as negative control for immunoprecipitation).

### **Mass spectrometry, database searching, processing, and statistical analysis**

MS data generation and MS raw spectra conversion to peptide and protein identification were blinded. Peptides were analyzed in two replicate runs by liquid chromatography-tandem mass spectrometry (LC-MS/MS) on a Dionex Ultimate 3000 NanoLC connected to an Orbitrap Elite (Thermo Fisher Scientific) equipped with an EasySpray ion source or on a Dionex Ultimate 3000 NanoLC connected to an Orbitrap Fusion™ Lumos™ Tribrid™ Mass Spectrometer (Thermo Fisher Scientific) equipped with an EasySpray ion source as previously reported (72). Data acquisition was done blinded to experimental groups.

Raw MS/MS data files were converted to mzXML format using MSconvert version v.3.0.6002 from ProteoWizard (73) for peaklist generation and used for database searching using two engines, X!Tandem (74) algorithm version 2013.06.15.1 and Comet (75) algorithm version 2014.02 rev.2. The dataset was searched against the concatenated target/decoy (76) rat (8,231 proteins), mouse (32,741 proteins) and human (20,218 proteins) in the Uniprot database (77) and additionally included non-reviewed protein IDs of the rat database (163,172 proteins on April 07, 2016). The uniqueness of identified sequences assigned to non-reviewed proteins was validated by manual Bastp search, thus filtering multiple assigned peptides.

Protein isoforms were only reported if a peptide comprising an amino acid sequence that was unique to the isoform was identified. The mass spectrometry proteomics data have been deposited to the ProteomeXchange Consortium via the PRIDE (<http://www.proteomexchange.org>) partner repository with the dataset identifier PXD025555 (78) Username: [reviewer\\_pxd025555@ebi.ac.uk](mailto:reviewer_pxd025555@ebi.ac.uk), Password: sflhF8HM).

MS protein quantification was carried out by averaging the raw peptide intensity among technical replicates and summed among cellular sub-fractions. The peptide signal intensity was normalized to the median of the overall sample signal intensity and protein level abundance inference was calculated using the linear mixed effects model built into the open sources MSSTATs (v3.2.2) software suite (79). MSstats implements the iterative least squares modeling procedure and models the data based on flexible loess fit. Thus, LC-MS peaks with larger variances will have reduced weights in the resulting model-based conclusion. It follows the standard testing procedure and calculates the ratio of the estimated differences and their standard error (in statistical terminology, the test statistic) for each protein, compares the test statistics to the Student distribution with the appropriate degrees of freedom to obtain p-values, and adjusts the p-values for multiple comparisons to control the False Discovery Rate in the list of differentially abundant proteins (79, 80).

For quantification of PTMs, intensities were normalized to the relative signal intensity of sample loading instead. Phosphorylated residues of peptides with missed cleavages or different charge states were summed before comparing MS1 intensity. Assignment of the exact phosphorylation sites is based on transition level data and was quantified by modified (+80) peptide abundance. Statistical significance was determined at a nominal *p*-value  $\leq 0.05$ . Upstream kinases potentially targeting significantly changed phosphorylated residues were identified using the Group-based prediction system v3.0 software.

Protein quantity of analyzed Western blots was normalized to direct blue staining, site-specific phosphorylation was normalized to the total of the equivalent protein. Normal distribution of data was analyzed using a non-parametric Kolmogorov-Smirnov test and significance was tested using the non-parametric Kruskal-Wallis one-way ANOVA ( $p < 0.05$ ) to compare experimental differences.

## **Expanded discussion**

### **Titin phosphorylation**

Unbiased wholesale phosphorylation analysis revealed that, even at baseline, cardiac titin is highly phosphorylated (83 phosphorylated sites) with four novel phosphorylation sites reported here for the first time: T4417, S13497, T22932 and T28577. Only five of the 83 identified residues (S20869, S33927, S33961, T33962 and T4117) were significantly different in diastolic dysfunction compared to control. This study is the first to suggest, that these sites are related to diastolic dysfunction prompting speculation that these sites could be key regulatory factors mediating titin's role in pathological cardiac stiffness. Paradoxically, several animal studies have demonstrated hypo-phosphorylation of total titin (81-83), whereas others have shown hyper-phosphorylation (84, 85). In humans with end-stage dilated cardiomyopathy, total titin phosphorylation was unchanged and only modest hyper-phosphorylation of total titin was detected in human hypertrophic cardiomyopathy hearts (86). Most studies investigating the relationship between titin phosphorylation and cardiac stiffness have focused on titin's spring elements, especially the two spring elements located within the isoform N2B and N2BA domains. These spring regions are comprised of three different structural motives, the N-terminal Ig – like domains, the N2B element and the PEVK region, which are all highly susceptible to posttranslational modifications (PTMs) (87). Investigations of myocardial samples from various species showed that phosphorylation within the N2B element predominantly decreases passive tension and phosphorylation of the PEVK element increases myocyte passive tension (7, 8, 81, 83). In patients with hypertensive HFpEF, hypo-

phosphorylation of residue S4185 within the N2Bus element is described (32). Furthermore, in human failing hearts phosphorylation of residues S4010, S4099 and S4185 was reduced (86). In contrast, phosphorylation of PEVK at sites S11878 was increased in a dog model of early HFpEF, and in humans with heart failure (83, 86). In metabolic-risk induced HFpEF, obese rats showed elevated phosphorylation at S12022 (S12884 rat), but residue S11878 (S12742 rat) was not altered (83). Both residues are targets of PKC $\alpha$  and CaMKII kinases (88, 89). Taken together, evidence from previous studies is not definitive, with mixed evidence of increased, decreased or unaltered total titin phosphorylation in various models of HFpEF. Mixed findings in the literature could relate to differences in disease stage analyzed, animal models used or other experimental complexities.

### **GRK kinase**

In this study, the GRK kinase family also showed increased amounts of shared consensus sequences with myofilament protein. We identified dysregulated G-protein-coupled receptor signaling in HFpEF rats via an increase of guanine nucleotide-binding protein G(i) subunit alpha-1 (Gnai1). An increase in Gnai1 is leading to reduced cAMP levels (90), via reduction of guanine nucleotide-binding protein G(i) subunit alpha-2 (Gnai2) and inhibiting adenylate cyclase in response to  $\beta$ -adrenergic stimuli (91). Inhibition of adenylate cyclase is increasing Rho guanine nucleotide exchange factor 12 (Arhgef12), which is acting as guanine nucleotide exchange factor (GEF) for RhoA GTPase. The latter may act as GTPase-activating protein for GNA12 and GNA13 (92).  $\beta$ -Adrenergic signaling plays an important role in regulating cardiac functions controlled by GRK phosphorylation events (93). In HF GRK upregulation causes pathological dysregulation of  $\beta$ -adrenergic receptors (94) whereas GRK2 inhibition restores cardiac function (95). The  $\beta$ -adrenergic-receptor kinase contains a phosphorylation motif attributed to PKC and PKA (96). The proteomic characterization of this HFpEF rat model suggests hyperactivity of  $\beta$ -adrenergic signaling is driving enhanced phosphorylation events via hyperactivity of GRK and PKC. In this scenario  $\beta$ -adrenergic activation would lead also to an upregulation of PKA activity, but the induced PKA hyperactivity is internally blunted via the upregulation of PKIA (14-fold increase in HFpEF compared to control). This is congruent with the relatively low amount of hyperphosphorylated residues within PKA consensus sequences found in this study. Further, it has been demonstrated that PKC $\alpha$  has a modulatory effect on cardiac contractility via  $\beta$ -adrenergic receptor modulation (97). Following CDC treatment, Gnai2 and Arhgef12 reverted to control levels indicating CDC treatment influences the  $\beta$ -adrenergic signaling. In line with these findings, PKC



(specifically PKC $\beta$ ) and PKIA revert towards control levels, thus suggesting a beneficial downregulation of  $\beta$ -adrenergic signaling via CDC therapy in HFpEF.

## Online Tables I - V

**Supplemental Table I A:** MS data of significant and trended changed phosphorylation sites for HFpEF animals compared to control (n=6) of sarcomeric proteins, their location, known function, and information about the changed phosphorylation site are listed. Total protein and phosphorylation changes are presented in log2 foldchanges (log2FC). Listed p-values were calculated using the linear mixed effects model built into MSSTATs.

| Protein Name                | Gene Name     | Location           | Role                                                       | HFpEF vs control |          | Phospho -site | HFpEF vs control |           |
|-----------------------------|---------------|--------------------|------------------------------------------------------------|------------------|----------|---------------|------------------|-----------|
|                             |               |                    |                                                            | log2FC           | p-value  |               | log2FC           | p-value   |
| Actin, aortic smooth muscle | <i>Acta2</i>  | Actin cytoskeleton | muscle contraction                                         | 1.16             | 0.041    | S241          | 1.23             | 0.021     |
| Actin, aortic smooth muscle | <i>Acta2</i>  | Actin cytoskeleton | muscle contraction                                         | 1.16             | 0.041    | Y242          | 0.98             | 0.026     |
| Actin-binding LIM protein 1 | <i>Ablim1</i> | Actin cytoskeleton | Cytoskeletal organization, actin binding                   | 0.46             | 0.003    | S496          | 1.28             | 0.037     |
| Actin-binding LIM protein 1 | <i>Ablim1</i> | Actin cytoskeleton | Cytoskeletal organization, actin binding                   | 0.46             | 0.003    | S499          | 1.28             | 0.037     |
| A-kinase anchor protein 13  | <i>Akap13</i> | Actin cytoskeleton | Regulation of sarcomere organization                       | NA               | NA       | S1585         | 1.39             | 0.012     |
| A-kinase anchor protein 13  | <i>Akap13</i> | Actin cytoskeleton | Regulation of sarcomere organization                       | NA               | NA       | S1520         | 0.94             | 0.020     |
| A-kinase anchor protein 13  | <i>Akap13</i> | Actin cytoskeleton | Regulation of sarcomere organization                       | NA               | NA       | S1891         | 1.11             | 0.001     |
| A-kinase anchor protein 13  | <i>Akap13</i> | Actin cytoskeleton | Regulation of sarcomere organization                       | NA               | NA       | S1583         | 1.27             | 0.006     |
| A-kinase anchor protein 13  | <i>Akap13</i> | Actin cytoskeleton | Regulation of sarcomere organization                       | NA               | NA       | T1590         | 1.17             | 0.049     |
| A-kinase anchor protein 2   | <i>Akap2</i>  | Actin cytoskeleton | Regulation of sarcomere organization                       | 0.88             | 0.023    | S730          | 0.80             | 0.032     |
| Alpha-actinin-2             | <i>Actn2</i>  | Z disc             | Actin filament uncapping, Titin Z domain binding           | 0.61             | 6.82E-06 | S574          | 1.71             | 0.044     |
| Alpha-crystallin B chain    | <i>Cryab</i>  | M band, Z disc     | Muscle organ development                                   | 0.57             | 9.58E-09 | S59           | 1.42             | 3.492E-05 |
| Alpha-crystallin B chain    | <i>Cryab</i>  | M band, Z disc     | Muscle organ development                                   | 0.57             | 9.58E-09 | S19           | 1.62             | 0.042     |
| Band 4.1-like protein 1     | <i>Epb411</i> | Cytoskeleton       | Actomyosin structure organization                          | NC               | NS       | S782          | 0.85             | 0.054     |
| CapZ-interacting protein    | <i>Rcsd1</i>  | Actin cytoskeleton | Actin filament assembly                                    | NA               | NA       | S53           | 1.01             | 0.038     |
| CapZ-interacting protein    | <i>Rcsd1</i>  | Actin cytoskeleton | Actin filament assembly                                    | NA               | NA       | S68           | 1.72             | 0.009     |
| CapZ-interacting protein    | <i>Rcsd1</i>  | Actin cytoskeleton | Actin filament assembly                                    | NA               | NA       | S90           | 0.83             | 0.059     |
| CapZ-interacting protein    | <i>Rcsd1</i>  | Actin cytoskeleton | Actin filament assembly                                    | NA               | NA       | S186          | 0.77             | 0.046     |
| Catenin alpha-1             | <i>Ctnna1</i> | Actin cytoskeleton | Actin filament assembly, actin binding, integrin signaling | 1.13             | 2.4E-10  | T654          | 2.56             | 0.017     |
| Catenin alpha-1             | <i>Ctnna1</i> | Actin cytoskeleton | Actin filament assembly, actin binding, integrin signaling | 1.13             | 2.4E-10  | T658          | 2.56             | 0.017     |
| Catenin alpha-1             | <i>Ctnna1</i> | Actin cytoskeleton | Actin filament assembly, actin binding, integrin signaling | 1.13             | 2.4E-10  | S657          | 0.80             | 0.039     |
| CLIP-associating protein 2  | <i>Clasp2</i> | Cytoskeleton       | Actin filament binding                                     | -0.62            | 0.016    | S581          | 1.35             | 0.051     |
| Cordon-bleu protein-like 1  | <i>Cobl1</i>  |                    | Actin filament polymerization                              | NA               | NA       | S666          | 0.87             | 0.027     |

|                                                         |                  |                    |                                                                             |      |          |       |      |       |
|---------------------------------------------------------|------------------|--------------------|-----------------------------------------------------------------------------|------|----------|-------|------|-------|
| Cysteine and glycine-rich protein 3                     | <i>Csrp3</i>     | Z disc             | Cardiac muscle contraction                                                  | 1.57 | 6.9E-12  | S111  | 1.43 | 0.019 |
| Cytoplasmic linker-associated protein 1                 | <i>Clasp1</i>    | Cytoskeleton       | Regulation of actin cytoskeleton organization                               | NC   | NS       | S1088 | 1.05 | 0.043 |
| Desmin                                                  | <i>Des</i>       | Z disc             | Muscle-specific type III intermediate filament                              | NC   | NS       | S28   | 1.73 | 0.056 |
| Desmin                                                  | <i>Des</i>       | Z disc             | Muscle-specific type III intermediate filament                              | NC   | NS       | S25   | 1.73 | 0.056 |
| Desmin                                                  | <i>Des</i>       | Z disc             | Muscle-specific type III intermediate filament                              | NC   | NS       | S32   | 1.73 | 0.056 |
| Desmin                                                  | <i>Des</i>       | Z disc             | Muscle-specific type III intermediate filament                              | NC   | NS       | S300  | 1.74 | 0.018 |
| Desmin                                                  | <i>Des</i>       | Z disc             | Muscle-specific type III intermediate filament                              | NC   | NS       | S303  | 1.74 | 0.018 |
| Drebrin                                                 | <i>Dbn1</i>      | Z disc             | Actin filament organization, negative regulation of muscle filament sliding | NC   | NS       | S142  | 0.63 | 0.049 |
| E3 ubiquitin-protein ligase UBR4                        | <i>Ubr4</i>      | Membrane           | Cytoskeletal organization, regulates integrin-mediated signaling            | NC   | NS       | S2715 | 1.21 | 0.040 |
| E3 ubiquitin-protein ligase UBR4                        | <i>Ubr4</i>      | Membrane           | Cytoskeletal organization, regulates integrin-mediated signaling            | NC   | NS       | S2719 | 0.51 | 0.054 |
| E3 ubiquitin-protein ligase UBR4                        | <i>Ubr4</i>      | Membrane           | Cytoskeletal organization, regulates integrin-mediated signaling            | NC   | NS       | S2897 | 2.10 | 0.030 |
| Erythrocyte membrane protein band 4.1-like 2            | <i>Epb41l2</i>   | Cytoskeleton       | Actin binding                                                               | NA   | NA       | S57   | 1.60 | 0.004 |
| FH1/FH2 domain-containing protein 1                     | <i>Fhod1</i>     | Cytoskeleton       | Actin binding                                                               | NA   | NA       | S141  | 1.19 | 0.034 |
| Filamin-A-interacting protein 1                         | <i>Filip1</i>    | Actin cytoskeleton | Actin binding                                                               | NC   | NS       | S979  | 1.36 | 0.011 |
| Filamin-C                                               | <i>FlnC</i>      | Z disc             | Actin filament organization                                                 | 1.21 | 2.16E-04 | S2234 | 0.78 | 0.015 |
| Filamin-C                                               | <i>FlnC</i>      | Z disc             | Actin filament organization                                                 | 1.21 | 2.16E-04 | S2237 | 2.35 | 0.004 |
| Formin-like protein 1                                   | <i>Fmn1l</i>     |                    | Actin filament severing, actin filament binding                             |      |          | S965  | 0.74 | 0.039 |
| Heat shock protein beta-1                               | <i>Hspb1</i>     |                    | Actin organization                                                          | 1.41 | 4.22E-11 | S86   | 1.18 | 0.002 |
| Heat shock protein beta-1                               | <i>Hspb1</i>     |                    | Actin organization                                                          | 1.41 | 4.22E-11 | S13   | 1.05 | 0.034 |
| Heat shock protein beta-1                               | <i>Hspb1</i>     |                    | Actin organization                                                          | 1.41 | 4.22E-11 | S15   | 1.20 | 0.006 |
| Heat shock protein beta-3                               | <i>Hspb3</i>     |                    | Inhibitor of actin polymerization                                           | 0.27 | 0.022    | T64   | 0.95 | 0.033 |
| Influenza virus NS1A-binding protein homolog            | <i>Ivns1ab p</i> | Actin cytoskeleton | Stabilizer of actin filaments                                               | NA   | NA       | S246  | 2.38 | 0.006 |
| Influenza virus NS1A-binding protein homolog            | <i>Ivns1ab p</i> | Actin cytoskeleton | Stabilizer of actin filaments                                               | NA   | NA       | S336  | 1.56 | 0.007 |
| Influenza virus NS1A-binding protein homolog            | <i>Ivns1ab p</i> | Actin cytoskeleton | Stabilizer of actin filaments                                               | NA   | NA       | S338  | 1.47 | 0.010 |
| Junction plakoglobin                                    | <i>Jup</i>       | Z disc             | Regulation of ventricular cardiac muscle cell action potential              | NC   | NS       | T78   | 1.86 | 0.059 |
| KN motif and ankyrin repeat domain-containing protein 1 | <i>Kank1</i>     |                    | Negative regulation of actin filament polymerization                        | NA   | NA       | S323  | 1.05 | 0.037 |

|                                                        |               |                    |                                                      |       |          |       |      |       |
|--------------------------------------------------------|---------------|--------------------|------------------------------------------------------|-------|----------|-------|------|-------|
| Leiomodlin-2                                           | <i>Lmod2</i>  | M band             | Actin polymerization, sarcomere organization         | 0.58  | 2.86E-05 | S405  | 0.76 | 0.006 |
| Leiomodlin-2                                           | <i>Lmod2</i>  | M band             | Actin polymerization, sarcomere organization         | 0.58  | 2.86E-05 | S394  | 1.95 | 0.012 |
| Leiomodlin-2                                           | <i>Lmod2</i>  | M band             | Actin polymerization, sarcomere organization         | 0.58  | 2.86E-05 | S394  | 1.35 | 0.006 |
| Leiomodlin-2                                           | <i>Lmod2</i>  | M band             | Actin polymerization, sarcomere organization         | 0.58  | 2.86E-05 | S398  | 1.95 | 0.012 |
| Leiomodlin-2                                           | <i>Lmod2</i>  | M band             | Actin polymerization, sarcomere organization         | 0.58  | 2.86E-05 | S422  | 0.98 | 0.013 |
| Leiomodlin-2                                           | <i>Lmod2</i>  | M band             | Actin polymerization, sarcomere organization         | 0.58  | 2.86E-05 | S514  | 2.10 | 0.004 |
| Leiomodlin-2                                           | <i>Lmod2</i>  | M band             | Actin polymerization, sarcomere organization         | 0.58  | 2.86E-05 | T518  | 2.10 | 0.004 |
| Leiomodlin-2                                           | <i>Lmod2</i>  | M band             | Actin polymerization, sarcomere organization         | 0.58  | 2.86E-05 | S398  | 1.75 | 0.024 |
| Leiomodlin-2                                           | <i>Lmod2</i>  | M band             | Actin polymerization, sarcomere organization         | 0.58  | 2.86E-05 | S394  | 2.02 | 0.014 |
| Leiomodlin-2                                           | <i>Lmod2</i>  | M band             | Actin polymerization, sarcomere organization         | 0.58  | 2.86E-05 | Y396  | 2.02 | 0.014 |
| Leiomodlin-2                                           | <i>Lmod2</i>  | M band             | Actin polymerization, sarcomere organization         | 0.58  | 2.86E-05 | S406  | 0.75 | 0.006 |
| LIM and calponin homology domains-containing protein 1 | <i>Limch1</i> | M band             | Actomyosin structure organization, actin binding     | 0.61  | 0.009    | S303  | 0.81 | 0.047 |
| LIM and calponin homology domains-containing protein 1 | <i>Limch1</i> | M band             | Actomyosin structure organization, actin binding     | 0.61  | 0.009    | T302  | 0.80 | 0.024 |
| LIM and calponin homology domains-containing protein 1 | <i>Limch1</i> | M band             | Actomyosin structure organization, actin binding     | 0.61  | 0.009    | S752  | 2.09 | 0.044 |
| LIM domain and actin-binding protein 1                 | <i>Lima1</i>  | Actin cytoskeleton | Bundles actin filaments                              | NA    | NA       | S488  | 0.80 | 0.017 |
| LIM domain-binding protein 3                           | <i>Ldb3</i>   | Z disc             | Sarcomere organization, muscle alpha-actinin binding | 0.71  | 5.59E-05 | S44   | 0.86 | 0.054 |
| LIM domain-binding protein 3                           | <i>Ldb3</i>   | Z disc             | Sarcomere organization, muscle alpha-actinin binding | 0.71  | 5.59E-05 | S121  | 1.10 | 0.017 |
| LIM domain-binding protein 3                           | <i>Ldb3</i>   | Z disc             | Sarcomere organization, muscle alpha-actinin binding | 0.71  | 5.59E-05 | S123  | 1.11 | 0.018 |
| LIM domain-binding protein 3                           | <i>Ldb3</i>   | Z disc             | Sarcomere organization, muscle alpha-actinin binding | 0.71  | 5.59E-05 | S98   | 1.35 | 0.016 |
| Macrophage-capping protein                             | <i>Capg</i>   |                    | Barbed-end actin filament capping                    | 0.75  | 3.37E-06 | S341  | 0.84 | 0.019 |
| Misshapen-like kinase 1                                | <i>Mink1</i>  |                    | Actin cytoskeleton reorganization                    | -1.49 | 7.22E-13 | S765  | 0.81 | 0.005 |
| Myomesin-2                                             | <i>Myom2</i>  | M band             | Binds myosin, titin, and light meromyosin            |       |          | S535  | 1.09 | 0.035 |
| Myopalladin                                            | <i>Mypn</i>   | Z disc             | Sarcomere organization, muscle alpha-actinin binding | 0.80  | 4.19E-04 | S622  | 0.60 | 0.031 |
| Myopalladin                                            | <i>Mypn</i>   | Z disc             | Sarcomere organization, muscle alpha-actinin binding | 0.80  | 4.19E-04 | S623  | 0.62 | 0.022 |
| Myopalladin                                            | <i>Mypn</i>   | Z disc             | Sarcomere organization, muscle alpha-actinin binding | 0.80  | 4.19E-04 | S737  | 0.82 | 0.025 |
| Myosin XVIIIb                                          | <i>Myo18b</i> | Myofilament        | Cardiac muscle fiber development                     | NA    | NA       | S2298 | 0.76 | 0.053 |
| Myosin-1                                               | <i>Myh1</i>   | Myofilament        | Muscle contraction                                   |       |          | S1373 | 1.03 | 0.022 |
| Myosin-11                                              | <i>Myh11</i>  | Myofilament        | Muscle contraction                                   | 0.31  | 0.006    | S1951 | 1.24 | 0.008 |
| Myosin-6                                               | <i>Myh6</i>   | Myofilament        | Sarcomere organization, striated muscle contraction  | 0.89  | 1.54E-08 | S649  | 0.78 | 0.054 |
| Myosin-6                                               | <i>Myh6</i>   | Myofilament        | Sarcomere organization, striated muscle contraction  | 0.89  | 1.54E-08 | S1235 | 2.49 | 0.050 |
| Myosin-6                                               | <i>Myh6</i>   | Myofilament        | Sarcomere organization, striated muscle contraction  | 0.89  | 1.54E-08 | S1089 | 2.49 | 0.037 |
| Myosin-7                                               | <i>Myh7</i>   | Myofilament        | Sarcomere organization, striated muscle contraction  | NA    | NA       | S1222 | 0.84 | 0.051 |
| Myosin-7                                               | <i>Myh7</i>   | Myofilament        | Sarcomere organization, striated muscle contraction  | NA    | NA       | S643  | 0.81 | 0.018 |
| Myosin-7                                               | <i>Myh7</i>   | Myofilament        | Sarcomere organization, striated muscle contraction  | NA    | NA       | S642  | 0.93 | 0.008 |

|                                                          |               |                       |                                                                                 |       |             |       |      |          |
|----------------------------------------------------------|---------------|-----------------------|---------------------------------------------------------------------------------|-------|-------------|-------|------|----------|
| Myosin-7                                                 | <i>Myh7</i>   | Myofilament           | Sarcomere organization, striated muscle contraction                             | NA    | NA          | S1491 | 0.54 | 0.044    |
| Myosin-7                                                 | <i>Myh7</i>   | Myofilament           | Sarcomere organization, striated muscle contraction                             | NA    | NA          | S1478 | 0.69 | 0.058    |
| Myosin-7                                                 | <i>Myh7</i>   | Myofilament           | Sarcomere organization, striated muscle contraction                             | NA    | NA          | T210  | 1.38 | 0.031    |
| Myosin-7                                                 | <i>Myh7</i>   | Myofilament           | Sarcomere organization, striated muscle contraction                             | NA    | NA          | T1019 | 1.63 | 2.40E-04 |
| Myosin-7                                                 | <i>Myh7</i>   | Myofilament           | Sarcomere organization, striated muscle contraction                             | NA    | NA          | S1233 | 2.81 | 0.027    |
| Myosin-7                                                 | <i>Myh7</i>   | Myofilament           | Sarcomere organization, striated muscle contraction                             | NA    | NA          | Y1308 | 2.13 | 0.032    |
| Myosin-7                                                 | <i>Myh7</i>   | Myofilament           | Sarcomere organization, striated muscle contraction                             | NA    | NA          | S1102 | 1.47 | 0.004    |
| Myosin-7                                                 | <i>Myh7</i>   | Myofilament           | Sarcomere organization, striated muscle contraction                             | NA    | NA          | S1140 | 2.23 | 0.047    |
| Myosin-7                                                 | <i>Myh7</i>   | Myofilament           | Sarcomere organization, striated muscle contraction                             | NA    | NA          | T1309 | 2.33 | 0.046    |
| Myosin-7                                                 | <i>Myh7</i>   | Myofilament           | Sarcomere organization, striated muscle contraction                             | NA    | NA          | T215  | 1.48 | 0.022    |
| Myozenin-2                                               | <i>Myoz2</i>  | Z disc                | Linking Z line proteins localizing calcineurin signaling to the sarcomere       | 0.37  | 0.001       | T107  | 0.74 | 0.055    |
| Myozenin-2                                               | <i>Myoz2</i>  | Z disc                | Linking Z line proteins localizing calcineurin signaling to the sarcomere       | 0.37  | 0.001       | T111  | 0.85 | 0.054    |
| Myristoylated alanine-rich C-kinase substrate            | <i>Marcks</i> | Actin filament bundle | Actin crosslink formation                                                       | -0.29 | 0.029       | T143  | 1.36 | 0.048    |
| Nebulin-related-anchoring protein                        | <i>Nrap</i>   | Intercalated disk     | Muscle alpha-actinin binding                                                    | 1.53  | 9.37814E-06 | S1693 | 1.52 | 0.026    |
| Nebulin-related-anchoring protein                        | <i>Nrap</i>   | Intercalated disk     | Muscle alpha-actinin binding                                                    | 1.53  | 9.37814E-06 | S275  | 1.56 | 0.025    |
| Nexilin                                                  | <i>Nexn</i>   | Z disc                | Maintenance of Z line and sarcomere integrity                                   | 0.76  | 3.45E-05    | S345  | 1.70 | 0.003    |
| Nexilin                                                  | <i>Nexn</i>   | Z disc                | Maintenance of Z line and sarcomere integrity                                   | 0.76  | 3.45E-05    | S348  | 1.55 | 0.002    |
| Nexilin                                                  | <i>Nexn</i>   | Z disc                | Maintenance of Z line and sarcomere integrity                                   | 0.76  | 3.45E-05    | T350  | 1.46 | 0.003    |
| Nexilin                                                  | <i>Nexn</i>   | Z disc                | Maintenance of Z line and sarcomere integrity                                   | 0.76  | 3.45E-05    | S330  | 1.65 | 0.043    |
| Nexilin                                                  | <i>Nexn</i>   | Z disc                | Maintenance of Z line and sarcomere integrity                                   | 0.76  | 3.45E-05    | S544  | 0.92 | 0.044    |
| Obscurin                                                 | <i>Obscn</i>  | M band, Z disc        | Structural constituent of muscle, titin binding, protein localization to M-band | 0.57  | 0.033       | S6618 | 1.50 | 0.007    |
| Oxysterol-binding protein-related protein 3              | <i>Osbpl3</i> |                       | Attenuates integrin beta-1 activation at the cell surface.                      | NA    | NA          | S272  | 2.27 | 0.034    |
| Paxillin                                                 | <i>Pxn</i>    | Z disc                | Cytoskeleton organization                                                       | NC    | NS          | S320  | 0.95 | 0.031    |
| Paxillin                                                 | <i>Pxn</i>    | Z disc                | Cytoskeleton organization                                                       | NC    | NS          | S321  | 1.14 | 0.014    |
| Paxillin                                                 | <i>Pxn</i>    | Z disc                | Cytoskeleton organization                                                       | NC    | NS          | S328  | 0.87 | 0.043    |
| Paxillin                                                 | <i>Pxn</i>    | Z disc                | Cytoskeleton organization                                                       | NC    | NS          | S327  | 0.91 | 0.031    |
| Paxillin                                                 | <i>Pxn</i>    | Z disc                | Cytoskeleton organization                                                       | NC    | NS          | T313  | 0.69 | 0.028    |
| Paxillin                                                 | <i>Pxn</i>    | Z disc                | Cytoskeleton organization                                                       | NC    | NS          | S317  | 0.66 | 0.030    |
| Paxillin                                                 | <i>Pxn</i>    | Z disc                | Cytoskeleton organization                                                       | NC    | NS          | S323  | 0.61 | 0.043    |
| Phosphatidylinositol 3,4,5-trisphosphate 5-phosphatase 2 | <i>Inpp1</i>  | Cytoskeleton          | Actin filament organization                                                     | -0.61 | 0.002       | S132  | 2.41 | 0.037    |
| Phosphoglucomutase-like protein 5                        | <i>Pgm5</i>   | Z disc                |                                                                                 | NC    | NS          | T120  | 1.41 | 0.013    |
| Phosphoglucomutase-like protein 5                        | <i>Pgm5</i>   | Z disc                |                                                                                 | NC    | NS          | S122  | 1.24 | 0.008    |
| Plectin                                                  | <i>Plec</i>   | Cytoskeleton          | Structural constituent of muscle                                                | NA    | NA          | S4388 | 1.52 | 0.040    |
| Plectin                                                  | <i>Plec</i>   | Cytoskeleton          | Structural constituent of muscle                                                | NA    | NA          | S4389 | 1.52 | 0.040    |

|                                                      |                  |                    |                                                                            |       |          |       |      |       |
|------------------------------------------------------|------------------|--------------------|----------------------------------------------------------------------------|-------|----------|-------|------|-------|
| Plectin                                              | <i>Plec</i>      | Cytoskeleton       | Structural constituent of muscle                                           | NA    | NA       | S4411 | 0.82 | 0.017 |
| Plectin                                              | <i>Plec</i>      | Cytoskeleton       | Structural constituent of muscle                                           | NA    | NA       | T4626 | 1.27 | 0.042 |
| Plectin                                              | <i>Plec</i>      | Cytoskeleton       | Structural constituent of muscle                                           | NA    | NA       | S4409 | 0.66 | 0.017 |
| Plectin                                              | <i>Plec</i>      | Cytoskeleton       | Structural constituent of muscle                                           | NA    | NA       | T4414 | 0.81 | 0.022 |
| Plectin                                              | <i>Plec</i>      | Cytoskeleton       | Structural constituent of muscle                                           | NA    | NA       | S4629 | 1.24 | 0.046 |
| Protein enabled homolog                              | <i>Enah</i>      | Actin cytoskeleton | Actin cytoskeleton organization                                            | NC    | NS       | S354  | 1.39 | 0.007 |
| Protein enabled homolog                              | <i>Enah</i>      | Actin cytoskeleton | Actin cytoskeleton organization                                            | NC    | NS       | S355  | 1.21 | 0.010 |
| Paxillin                                             | <i>Pxn</i>       | Z disc             | Cytoskeleton organization                                                  | NC    | NS       | T313  | 0.69 | 0.028 |
| Paxillin                                             | <i>Pxn</i>       | Z disc             | Cytoskeleton organization                                                  | NC    | NS       | S317  | 0.66 | 0.030 |
| Paxillin                                             | <i>Pxn</i>       | Z disc             | Cytoskeleton organization                                                  | NC    | NS       | S323  | 0.61 | 0.043 |
| Protein furry homolog                                | <i>Fry</i>       | Cytoskeleton       | Actin filament reorganization                                              | NA    | NA       | S1936 | 1.56 | 0.059 |
| Protein phosphatase 1 regulatory subunit 12A         | <i>Ppp1r1 2a</i> | Z disc             | Regulation of myosin-light-chain-phosphatase activity                      | 0.70  | 0.017    | S873  | 0.81 | 0.041 |
| Rho GTPase-activating protein 35                     | <i>Arhgap 35</i> | Cytoskeleton       | Regulation of actin cytoskeleton organization, Rho signaling               | NA    | NA       | S1179 | 1.28 | 0.034 |
| Septin-7                                             | <i>Sept7</i>     | Cytoskeleton       | Actin cytoskeleton organization                                            | -0.26 | 0.001    | T425  | 1.33 | 0.022 |
| Serine/threonine-protein kinase D1                   | <i>Prkd1</i>     | Cytosol            | Regulating integrin alpha-5/beta-3 recycling and promoting its recruitment | 1.74  | 2.10E-04 | S161  | 1.58 | 0.029 |
| SH3 domain-binding protein 1                         | <i>Sh3bp1</i>    |                    | Actin cytoskeleton organization                                            | NC    | NS       | S539  | 0.77 | 0.046 |
| Sorbin and SH3 domain-containing protein 1           | <i>Sorbs1</i>    | Cytoskeleton       | Formation of actin stress fibers                                           | 1.99  | 4.8E-05  | S401  | 0.81 | 0.044 |
| Sorbin and SH3 domain-containing protein 1           | <i>Sorbs1</i>    | Cytoskeleton       | Formation of actin stress fibers                                           | 1.99  | 4.8E-05  | S345  | 1.06 | 0.025 |
| Sorbin and SH3 domain-containing protein 1           | <i>Sorbs1</i>    | Cytoskeleton       | Formation of actin stress fibers                                           | 1.99  | 4.8E-05  | T404  | 0.84 | 0.032 |
| Sorbin and SH3 domain-containing protein 1           | <i>Sorbs1</i>    | Cytoskeleton       | Formation of actin stress fibers                                           | 1.99  | 4.8E-05  | S92   | 0.97 | 0.058 |
| Sorbin and SH3 domain-containing protein 1 Isoform 2 | <i>Sorbs1</i>    | Cytoskeleton       | Formation of actin stress fibers                                           | 1.99  | 4.8E-05  | S164  | 1.63 | 0.004 |
| Sorbin and SH3 domain-containing protein 2           | <i>Sorbs2</i>    | Cytoskeleton       | Actin cytoskeleton organization                                            | 0.90  | 0.001    | S397  | 1.58 | 0.017 |
| Sorbin and SH3 domain-containing protein 2           | <i>Sorbs2</i>    | Cytoskeleton       | Actin cytoskeleton organization                                            | 0.90  | 0.001    | S396  | 1.75 | 0.010 |
| Sorbin and SH3 domain-containing protein 2           | <i>Sorbs2</i>    | Cytoskeleton       | Actin cytoskeleton organization                                            | 0.90  | 0.001    | Y137  | 2.31 | 0.011 |
| Sorbin and SH3 domain-containing protein 2           | <i>Sorbs2</i>    | Cytoskeleton       | Actin cytoskeleton organization                                            | 0.90  | 0.001    | S138  | 2.38 | 0.046 |
| Sorbin and SH3 domain-containing protein 2           | <i>Sorbs2</i>    | Cytoskeleton       | Actin cytoskeleton organization                                            | 0.90  | 0.001    | S138  | 1.64 | 0.039 |

|                                            |                |                    |                                                       |      |             |       |      |          |
|--------------------------------------------|----------------|--------------------|-------------------------------------------------------|------|-------------|-------|------|----------|
| Sorbin and SH3 domain-containing protein 2 | <i>Sorbs2</i>  | Cytoskeleton       | Actin cytoskeleton organization                       | 0.90 | 0.001       | T136  | 2.04 | 0.025    |
| Sorbin and SH3 domain-containing protein 2 | <i>Sorbs2</i>  | Cytoskeleton       | Actin cytoskeleton organization                       | 0.90 | 0.001       | Y1112 | 1.67 | 0.010    |
| Sorbin and SH3 domain-containing protein 2 | <i>Sorbs2</i>  | Cytoskeleton       | Actin cytoskeleton organization                       | 0.90 | 0.001       | S266  | 1.78 | 0.023    |
| Sorbin and SH3 domain-containing protein 2 | <i>Sorbs2</i>  | Cytoskeleton       | Actin cytoskeleton organization                       | 0.90 | 0.001       | S354  | 0.84 | 0.055    |
| Sorbin and SH3 domain-containing protein 2 | <i>Sorbs2</i>  | Cytoskeleton       | Actin cytoskeleton organization                       | 0.90 | 0.001       | S324  | 1.35 | 0.018    |
| Sorbin and SH3 domain-containing protein 2 | <i>Sorbs2</i>  | Cytoskeleton       | Actin cytoskeleton organization                       | 0.90 | 0.001       | S1111 | 1.60 | 0.011    |
| Sorbin and SH3 domain-containing protein 2 | <i>Sorbs2</i>  | Cytoskeleton       | Actin cytoskeleton organization                       | 0.90 | 0.001       | S1113 | 1.79 | 0.016    |
| Sorbin and SH3 domain-containing protein 2 | <i>Sorbs2</i>  | Cytoskeleton       | Actin cytoskeleton organization                       | 0.90 | 0.001       | S1114 | 1.60 | 0.011    |
| Sorbin and SH3 domain-containing protein 2 | <i>Sorbs2</i>  | Cytoskeleton       | Actin cytoskeleton organization                       | 0.90 | 0.001       | S130  | 1.69 | 0.003    |
| Sorbin and SH3 domain-containing protein 2 | <i>Sorbs2</i>  | Cytoskeleton       | Actin cytoskeleton organization                       | 0.90 | 0.001       | S133  | 1.89 | 3.36E-04 |
| Sorbin and SH3 domain-containing protein 2 | <i>Sorbs2</i>  | Cytoskeleton       | Actin cytoskeleton organization                       | 0.90 | 0.001       | T136  | 1.52 | 0.010    |
| Sorbin and SH3 domain-containing protein 2 | <i>Sorbs2</i>  | Cytoskeleton       | Actin cytoskeleton organization                       | 0.90 | 0.001       | S143  | 1.72 | 0.006    |
| Sorbin and SH3 domain-containing protein 2 | <i>Sorbs2</i>  | Cytoskeleton       | Actin cytoskeleton organization                       | 0.90 | 0.001       | T147  | 2.06 | 0.013    |
| Sorbin and SH3 domain-containing protein 2 | <i>Sorbs2</i>  | Cytoskeleton       | Actin cytoskeleton organization                       | 0.90 | 0.001       | S334  | 1.49 | 0.035    |
| Sorbin and SH3 domain-containing protein 2 | <i>Sorbs2</i>  | Cytoskeleton       | Actin cytoskeleton organization                       | 0.90 | 0.001       | S340  | 1.89 | 0.022    |
| Sorbin and SH3 domain-containing protein 2 | <i>Sorbs2</i>  | Cytoskeleton       | Actin cytoskeleton organization                       | 0.90 | 0.001       | S343  | 1.89 | 0.022    |
| Sorbin and SH3 domain-containing protein 2 | <i>Sorbs2</i>  | Cytoskeleton       | Actin cytoskeleton organization                       | 0.90 | 0.001       | S341  | 1.23 | 0.031    |
| Sorbin and SH3 domain-containing protein 2 | <i>Sorbs2</i>  | Cytoskeleton       | Actin cytoskeleton organization                       | 0.90 | 0.001       | S343  | 1.61 | 0.052    |
| Sorbin and SH3 domain-containing protein 2 | <i>Sorbs2</i>  | Cytoskeleton       | Actin cytoskeleton organization                       | 0.90 | 0.001       | S38   | 1.19 | 0.012    |
| Sorbin and SH3 domain-containing protein 2 | <i>Sorbs2</i>  | Cytoskeleton       | Actin cytoskeleton organization                       | 0.90 | 0.001       | S399  | 1.66 | 0.024    |
| Sorbin and SH3 domain-containing protein 2 | <i>Sorbs2</i>  | Cytoskeleton       | Actin cytoskeleton organization                       | 0.90 | 0.001       | S340  | 2.02 | 0.041    |
| Striatin-interacting protein 1             | <i>Strip1</i>  |                    | Cytoskeletal organization                             | NA   | NA          | S335  | 1.00 | 0.050    |
| Supervillin                                | <i>Svil</i>    | Actin cytoskeleton | Actin filament binding                                | NA   | NA          | S240  | 0.63 | 0.028    |
| Supervillin                                | <i>Svil</i>    | Actin cytoskeleton | Actin filament binding                                | NA   | NA          | S242  | 0.79 | 0.023    |
| Supervillin                                | <i>Svil</i>    | Actin cytoskeleton | Actin filament binding                                | NA   | NA          | S866  | 1.05 | 0.022    |
| Supervillin                                | <i>Svil</i>    | Actin cytoskeleton | Actin filament binding                                | NA   | NA          | S728  | 1.61 | 0.042    |
| Synaptopodin                               | <i>Synpo</i>   | Actin cytoskeleton | Positive regulation of actin filament bundle assembly | 0.61 | 6.05045E-05 | S258  | 0.79 | 0.021    |
| Synaptopodin 2-like protein                | <i>Synpo2l</i> | Z disc             | Positive regulation of actin filament bundle assembly | 0.64 | 1.09E-04    | T141  | 1.95 | 0.020    |

|                             |                |                     |                                                                             |      |          |        |      |       |
|-----------------------------|----------------|---------------------|-----------------------------------------------------------------------------|------|----------|--------|------|-------|
| Synaptopodin 2-like protein | <i>Synpo2l</i> | Z disc              | Positive regulation of actin filament bundle assembly                       | 0.64 | 1.09E-04 | S143   | 1.95 | 0.020 |
| Synaptopodin 2-like protein | <i>Synpo2l</i> | Z disc              | Positive regulation of actin filament bundle assembly                       | 0.64 | 1.09E-04 | S929   | 0.80 | 0.044 |
| Synaptopodin 2-like protein | <i>Synpo2l</i> | Z disc              | Positive regulation of actin filament bundle assembly                       | 0.64 | 1.09E-04 | S95    | 0.99 | 0.029 |
| Synaptopodin 2-like protein | <i>Synpo2l</i> | Z disc              | Positive regulation of actin filament bundle assembly                       | 0.64 | 1.09E-04 | S97    | 0.95 | 0.029 |
| Synaptopodin-2              | <i>Synpo2</i>  | Z disc              | Assembly and stabilization of the Z lines                                   | 0.43 | 1.09E-04 | S895   | 0.78 | 0.054 |
| Syncoilin                   | <i>Sync</i>    | Z disc              | Coupling of mechanical stress between the myofibril and fiber exterior      | NC   | NS       | S314   | 0.92 | 0.025 |
| Synemin                     | <i>Synm</i>    | Z disc              | Structural constituent of muscle                                            | NA   | NA       | S780   | 0.89 | 0.027 |
| Synemin                     | <i>Synm</i>    | Z disc              | Structural constituent of muscle                                            | NA   | NA       | S1041  | 1.08 | 0.043 |
| Synemin                     | <i>Synm</i>    | Z disc              | Structural constituent of muscle                                            | NA   | NA       | S1042  | 1.06 | 0.032 |
| Synemin                     | <i>Synm</i>    | Z disc              | Structural constituent of muscle                                            | NA   | NA       | S1047  | 1.08 | 0.043 |
| Synemin                     | <i>Synm</i>    | Z disc              | Structural constituent of muscle                                            | NA   | NA       | S1047  | 1.06 | 0.032 |
| Synemin                     | <i>Synm</i>    | Z disc              | Structural constituent of muscle                                            | NA   | NA       | T1104  | 1.00 | 0.010 |
| Synemin                     | <i>Synm</i>    | Z disc              | Structural constituent of muscle                                            | NA   | NA       | S1105  | 0.79 | 0.043 |
| Synemin                     | <i>Synm</i>    | Z disc              | Structural constituent of muscle                                            | NA   | NA       | T1107  | 1.11 | 0.006 |
| Talin-1                     | <i>Tln1</i>    | Cytoskeleton        | Structural constituent of cytoskeleton, actin filament binding              | 0.39 | 5.11E-05 | S981   | 0.94 | 0.035 |
| Talin-1                     | <i>Tln1</i>    | Cytoskeleton        | Structural constituent of cytoskeleton, actin filament binding              | 0.39 | 5.11E-05 | S979   | 0.98 | 0.033 |
| Telethonin                  | <i>Tcap</i>    | Z disc              | Detection of muscle stretch, titin Z domain binding, sarcomere organization | 0.61 | 0.071    | S161   | 2.17 | 0.017 |
| Tensin 2                    | <i>Tns2</i>    | Actin stress fibers | Response to muscle activity                                                 | NA   | NA       | S455   | 0.84 | 0.045 |
| Tensin-1                    | <i>Tns1</i>    | Cytoskeleton        | Actin binding                                                               | NA   | NA       | S1032  | 1.39 | 0.049 |
| Tensin-1                    | <i>Tns1</i>    | Cytoskeleton        | Actin binding                                                               | NA   | NA       | S1081  | 0.77 | 0.042 |
| Tensin-1                    | <i>Tns1</i>    | Cytoskeleton        | Actin binding                                                               | NA   | NA       | S1222  | 0.99 | 0.058 |
| Tensin-1                    | <i>Tns1</i>    | Cytoskeleton        | Actin binding                                                               | NA   | NA       | S1480  | 1.28 | 0.051 |
| Tensin-1                    | <i>Tns1</i>    | Cytoskeleton        | Actin binding                                                               | NA   | NA       | T1501  | 1.07 | 0.027 |
| Tensin-1                    | <i>Tns1</i>    | Cytoskeleton        | Actin binding                                                               | NA   | NA       | S949   | 0.87 | 0.052 |
| Tensin-1                    | <i>Tns1</i>    | Cytoskeleton        | Actin binding                                                               | NA   | NA       | Y951   | 0.87 | 0.052 |
| Tensin-3                    | <i>Tns3</i>    |                     | Actin remodeling                                                            | NC   | NS       | S773   | 0.67 | 0.057 |
| Titin                       | <i>Ttn</i>     | Z disc              | Regulation of relaxation of cardiac muscle                                  | NC   | NS       | T299   | 3.30 | 0.078 |
| Titin                       | <i>Ttn</i>     | Z disc              | Regulation of relaxation of cardiac muscle                                  | NC   | NS       | S301   | 3.30 | 0.078 |
| Titin                       | <i>Ttn</i>     | Z disc              | Regulation of relaxation of cardiac muscle                                  | NC   | NS       | T812   | 1.85 | 0.060 |
| Titin                       | <i>Ttn</i>     | Z disc              | Regulation of relaxation of cardiac muscle                                  | NC   | NS       | S814   | 1.85 | 0.060 |
| Titin                       | <i>Ttn</i>     | Z disc              | Regulation of relaxation of cardiac muscle                                  | NC   | NS       | S17984 | 1.04 | 0.056 |
| Titin                       | <i>Ttn</i>     | Z disc              | Regulation of relaxation of cardiac muscle                                  | NC   | NS       | S20869 | 1.51 | 0.003 |
| Titin                       | <i>Ttn</i>     | Z disc              | Regulation of relaxation of cardiac muscle                                  | NC   | NS       | S22797 | 1.31 | 0.070 |
| Titin                       | <i>Ttn</i>     | Z disc              | Regulation of relaxation of cardiac muscle                                  | NC   | NS       | S33927 | 2.48 | 0.006 |
| Titin                       | <i>Ttn</i>     | Z disc              | Regulation of relaxation of cardiac muscle                                  | NC   | NS       | S33961 | 1.73 | 0.045 |
| Titin                       | <i>Ttn</i>     | Z disc              | Regulation of relaxation of cardiac muscle                                  | NC   | NS       | T33962 | 1.76 | 0.011 |
| Titin                       | <i>Ttn</i>     | Z disc              | Regulation of relaxation of cardiac muscle                                  | NC   | NS       | T34067 | 1.84 | 0.080 |

|                                               |               |              |                                                                                       |      |          |        |      |          |
|-----------------------------------------------|---------------|--------------|---------------------------------------------------------------------------------------|------|----------|--------|------|----------|
| Titin                                         | <i>Ttn</i>    | Z disc       | Regulation of relaxation of cardiac muscle                                            | NC   | NS       | Y34068 | 1.84 | 0.080    |
| Titin N2B                                     | <i>Ttn</i>    |              | Regulation of relaxation of cardiac muscle                                            | NC   | NS       | T4117  | 1.58 | 0.043    |
| Utrophin                                      | <i>Utrn</i>   | Cytoskeleton | Muscle contraction, actin filament binding                                            | NA   | NA       | S933   | 0.79 | 0.032    |
| Utrophin                                      | <i>Utrn</i>   | Cytoskeleton | Muscle contraction, actin filament binding                                            | NA   | NA       | S935   | 1.00 | 0.035    |
| Vasodilator-stimulated phosphoprotein         | <i>Vasp</i>   | Cytoskeleton | Actin cytoskeleton organization, positive regulation of actin filament polymerization | NA   | NA       | S236   | 1.65 | 0.040    |
| Vinculin                                      | <i>Vcl</i>    | Z disc       | Actin binding                                                                         | 0.22 | 2.18E-07 | S290   | 0.95 | 0.011    |
| Vinculin                                      | <i>Vcl</i>    | Z disc       | Actin binding                                                                         | 0.22 | 2.18E-07 | T602   | 1.01 | 0.013    |
| Vinculin                                      | <i>Vcl</i>    | Z disc       | Actin binding                                                                         | 0.22 | 2.18E-07 | T719   | 1.41 | 0.018    |
| Vinculin                                      | <i>Vcl</i>    | Z disc       | Actin binding                                                                         | 0.22 | 2.18E-07 | S721   | 1.35 | 0.016    |
| Vinculin                                      | <i>Vcl</i>    | Z disc       | Actin binding                                                                         | 0.22 | 2.18E-07 | S579   | 1.24 | 0.031    |
| Vinculin                                      | <i>Vcl</i>    | Z disc       | Actin binding                                                                         | 0.22 | 2.18E-07 | S795   | 1.63 | 0.007    |
| Vinculin                                      | <i>Vcl</i>    | Z disc       | Actin binding                                                                         | 0.22 | 2.18E-07 | S97    | 1.09 | 0.022    |
| WASH complex subunit 2                        | <i>Washc2</i> |              | Negative regulation of barbed-end actin filament capping                              | NA   | NA       | S387   | 0.79 | 0.037    |
| WASH complex subunit 2                        | <i>Washc2</i> |              | Negative regulation of barbed-end actin filament capping                              | NA   | NA       | S611   | 1.28 | 0.028    |
| Xin actin-binding repeat-containing protein 1 | <i>Xirp1</i>  | Z disc       | Protects actin filaments from depolymerization                                        | NA   | NA       | S532   | 1.38 | 0.017    |
| Xin actin-binding repeat-containing protein 1 | <i>Xirp1</i>  | Z disc       | Protects actin filaments from depolymerization                                        | NA   | NA       | S726   | 1.45 | 1.54E-04 |
| Xin actin-binding repeat-containing protein 1 | <i>Xirp1</i>  | Z disc       | Protects actin filaments from depolymerization                                        | NA   | NA       | S295   | 1.48 | 0.001    |
| Xin actin-binding repeat-containing protein 1 | <i>Xirp1</i>  | Z disc       | Protects actin filaments from depolymerization                                        | NA   | NA       | S332   | 2.23 | 0.002    |
| Xin actin-binding repeat-containing protein 2 | <i>Xirp2</i>  | Z disc       | Actin cytoskeleton organization, Protects actin filaments from depolymerization       | NA   | NA       | S2211  | 1.95 | 0.009    |
| Xin actin-binding repeat-containing protein 2 | <i>Xirp2</i>  | Z disc       | Actin cytoskeleton organization, Protects actin filaments from depolymerization       | NA   | NA       | S3246  | 1.41 | 0.057    |
| Xin actin-binding repeat-containing protein 2 | <i>Xirp2</i>  | Z disc       | Actin cytoskeleton organization, Protects actin filaments from depolymerization       | NA   | NA       | S1573  | 1.38 | 0.037    |
| Xin actin-binding repeat-containing protein 2 | <i>Xirp2</i>  | Z disc       | Actin cytoskeleton organization, Protects actin filaments from depolymerization       | NA   | NA       | S2198  | 2.60 | 0.003    |
| Xin actin-binding repeat-containing protein 2 | <i>Xirp2</i>  | Z disc       | Actin cytoskeleton organization, Protects actin filaments from depolymerization       | NA   | NA       | S2254  | 1.51 | 0.033    |
| Xin actin-binding repeat-containing protein 2 | <i>Xirp2</i>  | Z disc       | Actin cytoskeleton organization, Protects actin filaments from depolymerization       | NA   | NA       | S2970  | 0.97 | 0.029    |
| Xin actin-binding repeat-containing protein 2 | <i>Xirp2</i>  | Z disc       | Actin cytoskeleton organization, Protects actin filaments from depolymerization       | NA   | NA       | S3246  | 1.16 | 0.027    |
| Xin actin-binding repeat-containing protein 2 | <i>Xirp2</i>  | Z disc       | Actin cytoskeleton organization, Protects actin filaments from depolymerization       | NA   | NA       | S565   | 1.99 | 0.012    |



|                                               |              |        |                                                                                                                 |    |    |       |      |       |
|-----------------------------------------------|--------------|--------|-----------------------------------------------------------------------------------------------------------------|----|----|-------|------|-------|
| Xin actin-binding repeat-containing protein 2 | <i>Xirp2</i> | Z disc | filaments from depolymerization Actin cytoskeleton organization, Protects actin filaments from depolymerization | NA | NA | S813  | 1.95 | 0.004 |
| Xin actin-binding repeat-containing protein 2 | <i>Xirp2</i> | Z disc | Actin cytoskeleton organization, Protects actin filaments from depolymerization                                 | NA | NA | S1210 | 1.69 | 0.013 |
| Xin actin-binding repeat-containing protein 2 | <i>Xirp2</i> | Z disc | Actin cytoskeleton organization, Protects actin filaments from depolymerization                                 | NA | NA | S2252 | 2.53 | 0.008 |
| Xin actin-binding repeat-containing protein 2 | <i>Xirp2</i> | Z disc | Actin cytoskeleton organization, Protects actin filaments from depolymerization                                 | NA | NA | S2255 | 1.80 | 0.043 |
| Xin actin-binding repeat-containing protein 2 | <i>Xirp2</i> | Z disc | Actin cytoskeleton organization, Protects actin filaments from depolymerization                                 | NA | NA | S2258 | 1.90 | 0.033 |
| Xin actin-binding repeat-containing protein 2 | <i>Xirp2</i> | Z disc | Actin cytoskeleton organization, Protects actin filaments from depolymerization                                 | NA | NA | S2260 | 1.80 | 0.056 |
| Xin actin-binding repeat-containing protein 2 | <i>Xirp2</i> | Z disc | Actin cytoskeleton organization, Protects actin filaments from depolymerization                                 | NA | NA | S2291 | 2.03 | 0.021 |
| Xin actin-binding repeat-containing protein 2 | <i>Xirp2</i> | Z disc | Actin cytoskeleton organization, Protects actin filaments from depolymerization                                 | NA | NA | S2873 | 2.03 | 0.019 |
| Xin actin-binding repeat-containing protein 2 | <i>Xirp2</i> | Z disc | Actin cytoskeleton organization, Protects actin filaments from depolymerization                                 | NA | NA | T2875 | 1.63 | 0.016 |
| Xin actin-binding repeat-containing protein 2 | <i>Xirp2</i> | Z disc | Actin cytoskeleton organization, Protects actin filaments from depolymerization                                 | NA | NA | S2987 | 1.28 | 0.007 |
| Xin actin-binding repeat-containing protein 2 | <i>Xirp2</i> | Z disc | Actin cytoskeleton organization, Protects actin filaments from depolymerization                                 | NA | NA | S2957 | 0.94 | 0.055 |

Blank spaces represent proteins or phospho-sites, that weren't identified or were unchanged between treatment groups.

**Supplemental Table I B:** MS data of significant and trended changed phosphorylation sites for CDC treated animals compared to placebo (n=6) of sarcomeric proteins, their location, known function, and information about the changed phosphorylation site are listed. Total protein and phosphorylation changes are presented in log2 foldchanges (log2FC). Listed p-values were calculated using the linear mixed effects model built into MSSTATs.

| Protein Name                     | Gene Name     | Location           | Role                                     | CDC vs Placebo |         | Phospho-site | CDC vs Placebo |         |
|----------------------------------|---------------|--------------------|------------------------------------------|----------------|---------|--------------|----------------|---------|
|                                  |               |                    |                                          | log2FC         | p-value |              | log2FC         | p-value |
| Actin-binding LIM protein 1      | <i>Ablim1</i> | Actin cytoskeleton | Cytoskeletal organization, actin binding | -0.40          | 0.005   | S496         | -1.16          | 0.064   |
| Actin-binding LIM protein 1      | <i>Ablim1</i> | Actin cytoskeleton | Cytoskeletal organization, actin binding | -0.40          | 0.005   | S475         | 1.31           | 0.041   |
| Actin-binding LIM protein 1      | <i>Ablim1</i> | Actin cytoskeleton | Cytoskeletal organization, actin binding | -0.40          | 0.005   | S499         | -2.06          | 0.024   |
| Actin-binding LIM protein 1      | <i>Ablim1</i> | Actin cytoskeleton | Cytoskeletal organization, actin binding | -0.40          | 0.005   | S499         | -1.16          | 0.064   |
| Actin-binding LIM protein 1      | <i>Ablim1</i> | Actin cytoskeleton | Cytoskeletal organization, actin binding | -0.40          | 0.005   | T495         | -2.06          | 0.024   |
| Fructose-bisphosphate aldolase A | <i>Aldoa</i>  | M band, Z disc     | Muscle contraction                       | NC             | NS      | T37          | -2.10          | 0.035   |
| Fructose-bisphosphate aldolase A | <i>Aldoa</i>  | M band, Z disc     | Muscle contraction                       | NC             | NS      | S36          | -0.50          | 0.074   |

|                                                        |                 |                    |                                                                                 |       |         |       |       |       |
|--------------------------------------------------------|-----------------|--------------------|---------------------------------------------------------------------------------|-------|---------|-------|-------|-------|
| Fructose-bisphosphate aldolase A                       | <i>Aldoa</i>    | M band, Z disc     | Muscle contraction                                                              | NC    | NS      | T52   | -2.32 | 0.075 |
| Cdc42 effector protein 1                               | <i>Cdc42ep1</i> | Cytoskeleton       | Positive regulation of actin filament polymerization                            | NA    | NA      | S347  | -1.36 | 0.083 |
| Cdc42 effector protein 1                               | <i>Cdc42ep1</i> | Cytoskeleton       | Positive regulation of actin filament polymerization                            | NA    | NA      | S350  | -1.36 | 0.083 |
| Catenin alpha-1                                        | <i>Ctnna1</i>   | Actin cytoskeleton | Actin filament assembly, actin binding                                          | -0.22 | 0.033   | T647  | -1.80 | 0.062 |
| Catenin alpha-1                                        | <i>Ctnna1</i>   | Actin cytoskeleton | Actin filament assembly, actin binding                                          | -0.22 | 0.033   | S643  | -1.80 | 0.062 |
| Desmin                                                 | <i>Des</i>      | Z disc             | Muscle-specific type III intermediate filament                                  | NC    | NS      | S31   | -2.22 | 0.033 |
| Desmin                                                 | <i>Des</i>      | Z disc             | Muscle-specific type III intermediate filament                                  | NC    | NS      | S32   | -2.22 | 0.033 |
| Desmin                                                 | <i>Des</i>      | Z disc             | Muscle-specific type III intermediate filament                                  | NC    | NS      | S28   | -2.65 | 0.051 |
| Desmin                                                 | <i>Des</i>      | Z disc             | Muscle-specific type III intermediate filament                                  | NC    | NS      | S25   | -1.67 | 0.027 |
| Desmin                                                 | <i>Des</i>      | Z disc             | Muscle-specific type III intermediate filament                                  | NC    | NS      | S31   | -1.67 | 0.027 |
| Desmin                                                 | <i>Des</i>      | Z disc             | Muscle-specific type III intermediate filament                                  | NC    | NS      | S25   | -2.65 | 0.051 |
| Filamin-C LIM domain and actin-binding protein 1       | <i>Finc</i>     | Z disc             | Actin-cross-linking protein                                                     | NC    | NS      | S2633 | 0.94  | 0.057 |
| LIM and calponin homology domains-containing protein 1 | <i>Lima1</i>    | Actin cytoskeleton | Bundles actin filaments                                                         | NA    | NA      | S488  | 0.61  | 0.058 |
| LIM and calponin homology domains-containing protein 1 | <i>Limch1</i>   |                    | Actomyosin structure organization, actin binding                                | NC    | NS      | S217  | -1.72 | 0.089 |
| LIM and calponin homology domains-containing protein 1 | <i>Limch1</i>   |                    | Actomyosin structure organization, actin binding                                | NC    | NS      | T215  | -1.72 | 0.089 |
| Leiomodlin-2                                           | <i>Lmod2</i>    | M band             | Actin polymerization, sarcomere organization                                    | NC    | NS      | S394  | -0.90 | 0.048 |
| Leiomodlin-2                                           | <i>Lmod2</i>    | M band             | Actin polymerization, sarcomere organization                                    | NC    | NS      | S394  | -3.45 | 0.013 |
| Leiomodlin-2                                           | <i>Lmod2</i>    | M band             | Actin polymerization, sarcomere organization                                    | NC    | NS      | S514  | -2.05 | 0.015 |
| Leiomodlin-2                                           | <i>Lmod2</i>    | M band             | Actin polymerization, sarcomere organization                                    | NC    | NS      | S514  | -1.74 | 0.057 |
| Leiomodlin-2                                           | <i>Lmod2</i>    | M band             | Actin polymerization, sarcomere organization                                    | NC    | NS      | S517  | -1.74 | 0.057 |
| Leiomodlin-2                                           | <i>Lmod2</i>    | M band             | Actin polymerization, sarcomere organization                                    | NC    | NS      | S517  | -0.93 | 0.067 |
| Leiomodlin-2                                           | <i>Lmod2</i>    | M band             | Actin polymerization, sarcomere organization                                    | NC    | NS      | T518  | -2.05 | 0.015 |
| Leiomodlin-2                                           | <i>Lmod2</i>    | M band             | Actin polymerization, sarcomere organization                                    | NC    | NS      | Y396  | -3.45 | 0.013 |
| Myosin-binding protein C, cardiac-type                 | <i>Mybpc3</i>   | M band, Z disc     | Actin filament organization, cardiac muscle contraction                         | -0.26 | 0.024   | S302  | -2.27 | 0.075 |
| Myosin-6                                               | <i>Myh6</i>     | Z disc             | Sarcomere organization, striated muscle contraction                             | -0.51 | 2.4E-05 | S1270 | -0.98 | 0.089 |
| Myosin-6                                               | <i>Myh6</i>     | Z disc             | Sarcomere organization, striated muscle contraction                             | -0.51 | 2.4E-05 | S1089 | -1.90 | 0.088 |
| Myosin-7                                               | <i>Myh7</i>     | Z disc             | Sarcomere organization, striated muscle contraction                             | NA    | NA      | S560  | -1.10 | 0.100 |
| Myosin-7                                               | <i>Myh7</i>     | Z disc             | Sarcomere organization, striated muscle contraction                             | NA    | NA      | T1605 | -1.50 | 0.072 |
| Myosin-7                                               | <i>Myh7</i>     | Z disc             | Sarcomere organization, striated muscle contraction                             | NA    | NA      | Y410  | -2.29 | 0.043 |
| Myosin-9                                               | <i>Myh9</i>     | Actin cytoskeleton | Actomyosin structure organization                                               | NC    | NS      | S1944 | -1.20 | 0.071 |
| Myomesin-1                                             | <i>Myom1</i>    | M band, Z disc     | Sarcomere organization, striated muscle contraction                             | -0.22 | 0.019   | Y118  | 1.86  | 0.071 |
| Obscurin                                               | <i>Obscn</i>    | M band, Z disc     | Structural constituent of muscle, titin binding, protein localization to M-band | NC    | NS      | S454  | -2.13 | 0.068 |

|                                                   |                |                    |                                                       |       |          |        |       |       |
|---------------------------------------------------|----------------|--------------------|-------------------------------------------------------|-------|----------|--------|-------|-------|
| Septin-7                                          | <i>Sept7</i>   |                    | Organization of the actin cytoskeleton                | -0.24 | 0.001    | T425   | -1.13 | 0.046 |
| SH3 and multiple ankyrin repeat domains protein 3 | <i>Shank3</i>  |                    | Negative regulation of actin filament bundle assembly | NC    | NS       | T1235  | -1.88 | 0.063 |
| Shroom family member 3                            | <i>Shroom3</i> | Cytoskeleton       | Actin cytoskeleton organization                       | NA    | NA       | S763   | 1.06  | 0.099 |
| Sorbin and SH3 domain-containing protein 2        | <i>Sorbs2</i>  | Cytoskeleton       | Actin cytoskeleton organization                       | -0.40 | 0.029    | S143   | -1.43 | 0.081 |
| Sorbin and SH3 domain-containing protein 2        | <i>Sorbs2</i>  | Cytoskeleton       | Actin cytoskeleton organization                       | -0.40 | 0.029    | S340   | -1.46 | 0.077 |
| Sorbin and SH3 domain-containing protein 2        | <i>Sorbs2</i>  | Cytoskeleton       | Actin cytoskeleton organization                       | -0.40 | 0.029    | S343   | -1.46 | 0.077 |
| Sorbin and SH3 domain-containing protein 2        | <i>Sorbs2</i>  | Cytoskeleton       | Actin cytoskeleton organization                       | -0.40 | 0.029    | S394   | 1.91  | 0.025 |
| Sorbin and SH3 domain-containing protein 2        | <i>Sorbs2</i>  | Cytoskeleton       | Actin cytoskeleton organization                       | -0.40 | 0.029    | T136   | -1.43 | 0.081 |
| Spectrin alpha chain, non-erythrocytic 1          | <i>Sptan1</i>  |                    | Actin cytoskeleton reorganization                     | NC    | NS       | S1029  | -0.48 | 0.072 |
| Synaptopodin                                      | <i>Synpo</i>   | Actin cytoskeleton | Positive regulation of actin filament bundle assembly | -0.46 | 0.001    | S525   | -1.67 | 0.025 |
| Synaptopodin-2                                    | <i>Synpo2</i>  | Z disc             | Assembly and stabilization of the Z lines             | -0.28 | 0.004    | S546   | -2.61 | 0.014 |
| Synaptopodin-2                                    | <i>Synpo2</i>  | Z disc             | Assembly and stabilization of the Z lines             | -0.28 | 0.004    | S548   | -2.61 | 0.014 |
| Synaptopodin 2-like protein                       | <i>Synpo2l</i> | Z disc             | Positive regulation of actin filament bundle assembly | NC    | NS       | S143   | -2.21 | 0.042 |
| Synaptopodin 2-like protein                       | <i>Synpo2l</i> | Z disc             | Positive regulation of actin filament bundle assembly | NC    | NS       | S143   | -1.70 | 0.046 |
| Synaptopodin 2-like protein                       | <i>Synpo2l</i> | Z disc             | Positive regulation of actin filament bundle assembly | NC    | NS       | T141   | -1.70 | 0.046 |
| Synaptopodin 2-like protein                       | <i>Synpo2l</i> | Z disc             | Positive regulation of actin filament bundle assembly | NC    | NS       | Y138   | -2.21 | 0.042 |
| Tropomyosin alpha-1 chain                         | <i>Tpm1</i>    | Actin cytoskeleton | Muscle contraction                                    | -1.42 | 1.82E-08 | S283   | -0.92 | 0.021 |
| Tropomyosin alpha-1 chain                         | <i>Tpm1</i>    | Actin cytoskeleton | Muscle contraction                                    | -1.42 | 1.82E-08 | T282   | -1.95 | 0.044 |
| Titin                                             | <i>Ttn</i>     | M band             | Regulation of relaxation of cardiac muscle            | NC    | NS       | S34488 | -2.00 | 0.020 |
| Titin                                             | <i>Ttn</i>     | Z disc             | Regulation of relaxation of cardiac muscle            | NC    | NS       | S1444  | -2.52 | 0.087 |
| Titin                                             | <i>Ttn</i>     |                    | Regulation of relaxation of cardiac muscle            | NC    | NS       | S16620 | 1.21  | 0.026 |
| Titin                                             | <i>Ttn</i>     |                    | Regulation of relaxation of cardiac muscle            | NC    | NS       | S20869 | -0.95 | 0.017 |
| Titin                                             | <i>Ttn</i>     | Z disc             | Regulation of relaxation of cardiac muscle            | NC    | NS       | S322   | -1.72 | 0.012 |
| Titin                                             | <i>Ttn</i>     | M band             | Regulation of relaxation of cardiac muscle            | NC    | NS       | S33927 | -1.34 | 0.077 |
| Titin                                             | <i>Ttn</i>     | M band             | Regulation of relaxation of cardiac muscle            | NC    | NS       | T34067 | -1.23 | 0.090 |
| Titin                                             | <i>Ttn</i>     | M band             | Regulation of relaxation of cardiac muscle            | NC    | NS       | T34067 | -2.18 | 0.034 |
| Titin                                             | <i>Ttn</i>     | M band             | Regulation of relaxation of cardiac muscle            | NC    | NS       | Y34068 | -2.18 | 0.034 |
| Titin                                             | <i>Ttn</i>     | M band             | Regulation of relaxation of cardiac muscle            | NC    | NS       | Y34068 | -1.69 | 0.014 |
| Vinculin                                          | <i>Vcl</i>     | Z disc             | Actin binding                                         | -0.14 | 3.54E-05 | S346   | -0.56 | 0.069 |
| Whirlin                                           | <i>Whrn</i>    | Actin filament     |                                                       | NA    | NA       | S637   | -1.26 | 0.035 |
| Xin actin-binding repeat-containing protein 1     | <i>Xirp1</i>   | Z disc             | Protects actin filaments from depolymerization        | NA    | NA       | S745   | 0.63  | 0.044 |

Blank spaces represent proteins or phospho-sites, that weren't identified or were unchanged between treatment groups.

**Supplemental Table II A:** MS data of upstream kinases and their regulators. Shown are the fold change values (log<sub>2</sub>) of HFpEF compared to control for total protein concentration (n=3-4) and phosphorylation of S/T/Y residues (B, n=6). Total protein and phosphorylation changes are presented in log<sub>2</sub> foldchanges (log<sub>2</sub>FC). Listed p-values were calculated using the linear mixed effects model built into MSSTATs.

| Protein Name                                    | Gene Name     | Regulates Upstream Kinase | Phospho-site | HFpEF vs control (log <sub>2</sub> FC) | p-value  |
|-------------------------------------------------|---------------|---------------------------|--------------|----------------------------------------|----------|
| Cyclin-H                                        | <i>Ccnh</i>   | CDK2                      |              | -3.45                                  | 5.09E-05 |
| Casein kinase I isoform delta                   | <i>Csnk1d</i> | CK1                       |              | 2.22                                   | 0.033    |
| 5'-AMP-activated protein kinase subunit gamma-2 | <i>Prkag2</i> | PHK                       | S196         | 1.02                                   | 0.046    |
| A-kinase anchor protein 12                      | <i>Akap12</i> | PKC                       |              | -1.19                                  | 0.001    |
| Cysteine and glycine-rich protein 3             | <i>Csrp3</i>  | PKC                       |              | 1.54                                   | 6.9E-12  |
| Cysteine and glycine-rich protein 3             | <i>Csrp3</i>  | PKC                       | S111         | 1.43                                   | 0.019    |
| Heat shock protein beta-1                       | <i>Hspb1</i>  | PKC                       |              | 1.41                                   | 4.22E-11 |
| Heat shock protein beta-1                       | <i>Hspb1</i>  | PKC                       | S13          | 1.05                                   | 0.034    |
| Heat shock protein beta-1                       | <i>Hspb1</i>  | PKC                       | S86          | 1.18                                   | 0.002    |
| Heat shock protein beta-1                       | <i>Hspb1</i>  | PKC                       | S15          | 1.20                                   | 0.006    |
| LIM domain-binding protein 3                    | <i>Ldb3</i>   | PKC                       |              | 0.71                                   | 5.59E-05 |
| LIM domain-binding protein 3                    | <i>Ldb3</i>   | PKC                       | S121         | 1.10                                   | 0.017    |
| LIM domain-binding protein 3                    | <i>Ldb3</i>   | PKC                       | S123         | 1.11                                   | 0.018    |
| LIM domain-binding protein 3                    | <i>Ldb3</i>   | PKC                       | S98          | 1.55                                   | 0.013    |
| LIM domain-binding protein 3                    | <i>Ldb3</i>   | PKC                       | S44          | 0.86                                   | 0.054    |
| PDZ and LIM domain protein 5                    | <i>Pdlim5</i> | PKC                       |              | 1.19                                   | 1.55E-05 |
| Protein kinase C delta type                     | <i>Prkcd</i>  | PKC                       | S643         | 1.44                                   | 0.042    |
| Receptor of activated protein C kinase 1        | <i>Rack1</i>  | PKC                       |              | 0.49                                   | 2.98E-04 |
| Sequestosome-1                                  | <i>Sqstm1</i> | PKC                       |              | 0.44                                   | 0.048    |
| Neutral alpha-glucosidase AB                    | <i>Ganab</i>  | PKD1                      |              | 0.36                                   | 0.043    |
| Serine/threonine-protein kinase D1              | <i>Prkd1</i>  | PKD1                      |              | 1.74                                   | 2.10E-04 |
| A-kinase anchor protein 13                      | <i>Akap13</i> | PKD1                      | S1891        | 1.11                                   | 0.001    |
| A-kinase anchor protein 13                      | <i>Akap13</i> | PKD1                      | S1583        | 1.27                                   | 0.006    |
| A-kinase anchor protein 13                      | <i>Akap13</i> | PKD1                      | T1590        | 1.17                                   | 0.049    |
| A-kinase anchor protein 13                      | <i>Akap13</i> | PKD1                      | S1520        | 0.94                                   | 0.020    |
| A-kinase anchor protein 13                      | <i>Akap13</i> | PKD1                      | S1585        | 1.39                                   | 0.012    |

\* Kinase is not regulated in the direction of its potential targets according to MS data and thus were not considered as relevant upstream kinase.

**Supplemental Table II B:** MS data of upstream kinases and their regulators. Shown are the fold change values (log<sub>2</sub>) of CDC treatment compared to placebo for total protein concentration (n=4) and phosphorylation of S/T/Y residues (B, n=6). Total protein and phosphorylation changes are presented in log<sub>2</sub> foldchanges (log<sub>2</sub>FC). Listed p-values were calculated using the linear mixed effects model built into MSSTATs.

| Protein Name                             | Gene Name     | Regulates Upstream Kinase | Phospho-site | CDC vs Placebo (log <sub>2</sub> FC) | p-value  |
|------------------------------------------|---------------|---------------------------|--------------|--------------------------------------|----------|
| Cyclin-H                                 | <i>Ccnh</i>   | CDK2                      |              | 2.63                                 | 4.89E-04 |
| A-kinase anchor protein 12               | <i>Akap12</i> | PKC                       |              | 0.86                                 | 0.005    |
| Cysteine and glycine-rich protein 3      | <i>Csrp3</i>  | PKC                       |              | -0.63                                | 8.36E-06 |
| PDZ and LIM domain protein 5             | <i>Pdlim5</i> | PKC                       | S228         | -2.63                                | 0.059    |
| PDZ and LIM domain protein 5             | <i>Pdlim5</i> | PKC                       |              | -0.43                                | 0.042    |
| Protein kinase C delta type              | <i>Prkcd</i>  | PKC                       |              | -1.81                                | 1.01E-07 |
| Receptor of activated protein C kinase 1 | <i>Rack1</i>  | PKC                       |              | -0.29                                | 0.012    |

**Supplemental table III A:** Confirmed PKC phosphorylation sites by recombinant kinase assay. Phosphorylated residues uniquely detected in the group of cell lysate receiving recombinant kinase are labeled with Inf. Phosphorylation changes are presented in log2 foldchanges (log2FC). Listed p-values were calculated using the linear mixed effects model built into MSSTATs.

| Protein Name                                             | Gene Name       | Phospho-site | PKC $\alpha$ vs Control |         | PKC $\beta$ vs Control |         | PKC $\delta$ vs Control |         |
|----------------------------------------------------------|-----------------|--------------|-------------------------|---------|------------------------|---------|-------------------------|---------|
|                                                          |                 |              | log2FC                  | p-value | log2FC                 | p-value | log2FC                  | p-value |
| A-kinase anchor protein 13                               | <i>Akap13</i>   | S1585        | 1.28                    | 0.069   | NC                     | NS      | NC                      | NS      |
| Alpha-crystallin B chain                                 | <i>Cryab</i>    | S59          | NC                      | NS      | NC                     | NS      | 1.18                    | 0.052   |
| Catenin alpha-1                                          | <i>Ctnna1</i>   | S643         | NC                      | NS      | 0.54                   | 0.088   | NC                      | NS      |
| Desmin                                                   | <i>Des</i>      | S28          | 2.43                    | 0.073   | 0.94                   | 0.044   | 1.76                    | 0.016   |
| Drebrin                                                  | <i>Dbn1</i>     | S142         | 0.73                    | 0.077   | NC                     | NS      | NC                      | NS      |
| E3 ubiquitin-protein ligase UBR4                         | <i>Ubr4</i>     | S2715        | 0.83                    | 0.072   | NC                     | NS      | NC                      | NS      |
| E3 ubiquitin-protein ligase UBR4                         | <i>Ubr4</i>     | S2719        | 0.83                    | 0.072   | NC                     | NS      | NC                      | NS      |
| Filamin-A-interacting protein 1                          | <i>Filip1</i>   | S979         | 0.33                    | 0.048   | NC                     | NS      | 0.51                    | 0.006   |
| Filamin-C                                                | <i>Fln</i>      | S2234        | 0.63                    | 0.054   | NC                     | NS      | 0.50                    | 0.056   |
| Filamin-C                                                | <i>Fln</i>      | S2237        | NC                      | NS      | Inf                    |         | NC                      | NS      |
| Fructose-bisphosphate aldolase A                         | <i>Aldoa</i>    | T37          | 1.25                    | 0.005   | NC                     | NS      | 0.77                    | 0.022   |
| Heat shock protein beta-1                                | <i>Hspb1</i>    | S86          | 0.83                    | 0.050   | NC                     | NS      | 0.70                    | 0.092   |
| Leiomodin-2                                              | <i>Lmod2</i>    | S394         | 1.24                    | 0.049   | NC                     | NS      | NC                      | NS      |
| Leiomodin-2                                              | <i>Lmod2</i>    | S405         | 0.74                    | 0.104   | NC                     | NS      | 0.75                    | 0.102   |
| LIM domain-binding protein 3                             | <i>Ldb3</i>     | S44          | NC                      | NS      | NC                     | NS      | 1.66                    | 0.014   |
| Misshapen-like kinase 1                                  | <i>Mink1</i>    | S765         | NC                      | NS      | NC                     | NS      | 1.41                    | 0.023   |
| Myosin-1                                                 | <i>Myh1</i>     | S1373        | 1.07                    | 0.072   | NC                     | NS      | 1.11                    | 0.063   |
| Myosin-6                                                 | <i>Myh6</i>     | S1270        | 1.02                    | 0.039   | NC                     | NS      | 0.89                    | 0.042   |
| Myosin-6                                                 | <i>Myh6</i>     | S649         | 2.39                    | 0.000   | 1.31                   | 0.007   | 1.99                    | 0.000   |
| Myosin-7                                                 | <i>Myh7</i>     | S1222        | NC                      | NS      | NC                     | NS      | 2.29                    | 0.077   |
| Myosin-7                                                 | <i>Myh7</i>     | S1478        | NC                      | NS      | NC                     | NS      | 0.82                    | 0.045   |
| Myosin-7                                                 | <i>Myh7</i>     | S1491        | 1.30                    | 0.026   | NC                     | NS      | 1.07                    | 0.057   |
| Myosin-7                                                 | <i>Myh7</i>     | S560         | Inf                     |         | Inf                    |         | Inf                     |         |
| Myosin-7                                                 | <i>Myh7</i>     | S642         | 2.39                    | 0.000   | 1.31                   | 0.007   | 1.99                    | 0.000   |
| Myosin-7                                                 | <i>Myh7</i>     | S643         | 2.30                    | 0.000   | 1.18                   | 0.008   | 2.01                    | 0.000   |
| Phosphatidylinositol 3,4,5-trisphosphate 5-phosphatase 2 | <i>Inpp1</i>    | S132         | NC                      | NS      | -3.08                  | 0.025   | NC                      | NS      |
| Plectin                                                  | <i>Plec</i>     | S4388        | 1.41                    | 0.034   | 0.75                   | 0.055   | NC                      | NS      |
| Plectin                                                  | <i>Plec</i>     | S4389        | 1.41                    | 0.034   | 0.75                   | 0.055   | NC                      | NS      |
| Plectin                                                  | <i>Plec</i>     | S4629        | Inf                     |         | NC                     | NS      | Inf                     |         |
| Rho GTPase-activating protein 35                         | <i>Arhgap35</i> | S1179        | 0.81                    | 0.095   | NC                     | NS      | 1.15                    | 0.025   |
| Sorbin and SH3 domain-containing protein 2               | <i>Sorbs2</i>   | S396         | NC                      | NS      | 0.99                   | 0.029   | 0.96                    | 0.033   |
| Sorbin and SH3 domain-containing protein 2               | <i>Sorbs2</i>   | S397         | 0.85                    | 0.006   | 0.96                   | 0.003   | 0.97                    | 0.003   |
| Sorbin and SH3 domain-containing protein 2               | <i>Sorbs2</i>   | S40          | NC                      | NS      | NC                     | NS      | 0.95                    | 0.088   |
| Talin-1                                                  | <i>Tln1</i>     | S979         | NC                      | NS      | 0.65                   | 0.025   | NC                      | NS      |
| Talin-1                                                  | <i>Tln1</i>     | S981         | NC                      | NS      | 1.18                   | 0.021   | NC                      | NS      |
| Titin                                                    | <i>Ttn</i>      | S301         | NC                      | NS      | 0.47                   | 0.087   | NC                      | NS      |
| Titin                                                    | <i>Ttn</i>      | S34488       | NC                      | NS      | 0.75                   | 0.105   | NC                      | NS      |
| Titin                                                    | <i>Ttn</i>      | T299         | NC                      | NS      | 0.47                   | 0.087   | NC                      | NS      |
| Vinculin                                                 | <i>Vcl</i>      | S346         | 1.20                    | 0.058   | NC                     | NS      | NC                      | NS      |

|                                               |               |       |      |       |    |    |    |    |
|-----------------------------------------------|---------------|-------|------|-------|----|----|----|----|
| WASH complex subunit 2                        | <i>Washc2</i> | S387  | 0.89 | 0.069 | NA | NA | NC | NS |
| Xin actin-binding repeat-containing protein 2 | <i>Xirp2</i>  | S2211 | 1.02 | 0.092 | NA | NA | NC | NS |

Blank spaces represent proteins or phospho-sites, that weren't identified or were not statistical different between treatment groups.

**Supplemental table III B:** Confirmed PKC phosphorylation sites by kinase inhibition. Phosphorylation changes are presented in log2 foldchanges (log2FC). Listed p-values were calculated using the linear mixed effects model built into MSSTATs.

| Protein Name                                                      | Gene Name     | Phospho-site | PKC $\alpha$ vs Control |         | PKC $\beta$ vs Control |         | PKC $\delta$ vs Control |         | PKC vs Control |         |
|-------------------------------------------------------------------|---------------|--------------|-------------------------|---------|------------------------|---------|-------------------------|---------|----------------|---------|
|                                                                   |               |              | log2FC                  | p-value | log2FC                 | p-value | log2FC                  | p-value | log2FC         | p-value |
| Filamin-C                                                         | <i>Fln</i>    | S2234        | NC                      | NS      | NC                     | NS      | -0.99                   | 0.03    | NC             | NS      |
| Filamin-C                                                         | <i>Fln</i>    | S2237        | NC                      | NS      | NC                     | NS      | -0.99                   | 0.03    | NA             | NA      |
| Filamin-C                                                         | <i>Fln</i>    | S2633        | NC                      | NS      | -0.89                  | 0.02    | NC                      | NS      | NC             | NS      |
| Phosphatidylinositol 3,4,5-trisphosphate 5-phosphatase 2          | <i>Inpp1</i>  | S132         | NC                      | NS      | NC                     | NS      | NC                      | NS      | -2.67          | 0.018   |
| Myosin-9                                                          | <i>Myh9</i>   | S1944        | NC                      | NS      | -1.03                  | 0.057   | NC                      | NS      | -0.97          | 0.074   |
| Nexilin                                                           | <i>Nexn</i>   | S544         | -2.15                   | 0.022   | NC                     | NS      | -2.13                   | 0.019   | -2.51          | 0.034   |
| Paxillin                                                          | <i>Pxn</i>    | S317         | NC                      | NS      | -0.92                  | 0.095   | NC                      | NS      | NC             | NS      |
| Plectin                                                           | <i>Plec</i>   | S4388        | NC                      | NS      | NC                     | NS      | NC                      | NS      | -0.73          | 0.054   |
| Plectin                                                           | <i>Plec</i>   | S4389        | NC                      | NS      | NC                     | NS      | NC                      | NS      | -0.73          | 0.054   |
| Plectin                                                           | <i>Plec</i>   | S4409        | NC                      | NS      | NC                     | NS      | NC                      | NS      | -1.19          | 0.094   |
| Plectin                                                           | <i>Plec</i>   | S4411        | NC                      | NS      | NC                     | NS      | NC                      | NS      | -1.73          | 0.019   |
| Septin-7                                                          | <i>Sept7</i>  | T425         | NC                      | NS      | NC                     | NS      | NC                      | NS      | -1.11          | 0.011   |
| SH3 domain-binding protein 1                                      | <i>Sh3bp1</i> | S539         | NC                      | NS      | NC                     | NS      | NC                      | NS      | -2.08          | 0.083   |
| Sorbin and SH3 domain-containing Sorbin and SH3 domain-containing | <i>Sorbs2</i> | S38          | NC                      | NS      | NC                     | NS      | -1.91                   | 0.01    | NC             | NS      |
| Spectrin alpha chain                                              | <i>Sorbs2</i> | S397         | -1.5                    | 0.01    | NC                     | NS      | NC                      | NS      | NC             | NS      |
| E3 ubiquitin-protein ligase UBR4                                  | <i>Sptan1</i> | S1029        | -2.15                   | 0.01    | -2.00                  | 0.016   | -2.15                   | 0.01    | NC             | NS      |
| Vinculin                                                          | <i>Ubr4</i>   | S2897        | NC                      | NS      | NC                     | NS      | NC                      | NS      | -1.08          | 0.07    |
| Vinculin                                                          | <i>Vcl</i>    | S290         | NC                      | NS      | NC                     | NS      | NC                      | NS      | -1.36          | 0.080   |
| Vinculin                                                          | <i>Vcl</i>    | S346         | NC                      | NS      | NC                     | NS      | NC                      | NS      | -1.36          | 0.0     |
| WASH complex subunit 2                                            | <i>Washc2</i> | S387         | NC                      | NS      | NC                     | NS      | NC                      | NS      | -0.82          | 0.018   |
| WASH complex subunit 2                                            | <i>Washc2</i> | S611         | NC                      | NS      | NC                     | NS      | NC                      | NS      | -0.85          | 0.072   |

Blank spaces represent proteins or phospho-sites, that weren't identified or were not statistical different between treatment groups.

**Supplemental table 3C:** Confirmed PKC phosphorylation sites by kinase and kinase regulator overexpression. Phosphorylation changes are presented in log2 foldchanges (log2FC). Listed p-values were calculated using the linear mixed effects model built into MSSTATs.

| Protein Name              | Gene Name    | Phospho-site | PKC $\alpha$ + Ldb3 vs control |         | PKC $\alpha$ + Pdlim5 vs control |          | PKC $\beta$ + Ldb3 vs control |         | PKC $\beta$ + Pdlim5 vs control |         |
|---------------------------|--------------|--------------|--------------------------------|---------|----------------------------------|----------|-------------------------------|---------|---------------------------------|---------|
|                           |              |              | log2FC                         | p-value | log2FC                           | p-values | log2FC                        | p-value | log2FC                          | p-value |
| Heat shock protein beta-1 | <i>Hspb1</i> | S13          | NC                             | NS      | 2.44                             | 0.034    | 0.67                          | 0.055   | NC                              | NS      |
| Vinculin                  | <i>Vcl</i>   | S290         | NC                             | NS      | 0.91                             | 0.079    | NC                            | NS      | 0.99                            | 0.059   |

Blank spaces represent proteins or phospho-sites, that weren't identified or were not statistical different between treatment groups.

**Supplemental Table IV A:** MS data of significantly changed phosphatases in HFpEF animals compared to control for total protein (n=3-4) and phosphorylation (n=6). Total protein and phosphorylation changes are presented in log2 foldchanges (log2FC). Listed p-values were calculated using the linear mixed effects model built into MSSTATs.

| Protein Name                                                                      | Gene Name       | Phospho-site | HFpEF vs control |          |
|-----------------------------------------------------------------------------------|-----------------|--------------|------------------|----------|
|                                                                                   |                 |              | log2FC           | p-value  |
| [Pyruvate dehydrogenase [acetyl-transferring]]-phosphatase 1, mitochondrial       | <i>Pdp1</i>     |              | -0.36            | 1.91E-06 |
| [Pyruvate dehydrogenase [acetyl-transferring]]-phosphatase 2, mitochondrial       | <i>Pdp2</i>     |              | 8.10             | 1.65E-09 |
| 3'(2'),5'-bisphosphate nucleotidase 1                                             | <i>Bpnt1</i>    |              | 0.51             | 2.30E-06 |
| 6-phosphofructo-2-kinase/fructose-2,6-bisphosphatase 2                            | <i>Pfkfb2</i>   | S469         | 0.76             | 0.060    |
| Diphosphoinositol polyphosphate phosphohydrolase 1                                | <i>Nudt3</i>    |              | 0.28             | 0.044    |
| Diphosphoinositol polyphosphate phosphohydrolase 2                                | <i>Nudt4</i>    |              | 1.95             | 0.001    |
| Dual specificity protein phosphatase 3                                            | <i>Dusp3</i>    |              | 0.59             | 2.33E-06 |
| Haloacid dehalogenase-like hydrolase domain-containing protein 2                  | <i>Hdhd2</i>    |              | -1.74            | 0.005    |
| Inactive dual specificity phosphatase 27                                          | <i>Dusp27</i>   | S32          | 0.99             | 0.037    |
| Inactive dual specificity phosphatase 27                                          | <i>Dusp27</i>   | S965         | 1.00             | 0.050    |
| Inactive phospholipid phosphatase 7                                               | <i>Plpp7</i>    |              | -1.89            | 0.050    |
| Inorganic pyrophosphatase 2, mitochondrial                                        | <i>Ppa2</i>     |              | -0.65            | 0.001    |
| Magnesium-dependent phosphatase 1                                                 | <i>Mdp1</i>     |              | 1.93             | 0.001    |
| Myotubularin-related protein 3                                                    | <i>Mtmr3</i>    |              | -1.21            | 0.036    |
| PH domain leucine-rich repeat protein phosphatase 1                               | <i>Phlpp1</i>   | S1598        | 2.27             | 0.007    |
| Phosphatidate phosphatase LPIN1                                                   | <i>Lpin1</i>    |              | 0.54             | 7.67E-07 |
| Phosphatidylinositol phosphatase SAC1                                             | <i>Sacm1l</i>   |              | -0.35            | 0.004    |
| Phosphatidylinositol 3,4,5-trisphosphate 5-phosphatase 2                          | <i>Inpp1l</i>   | S132         | 2.41             | 0.037    |
| Phosphoethanolamine/phosphocholine phosphatase                                    | <i>Phospho1</i> |              | -0.46            | 0.007    |
| Protein phosphatase 1 regulatory subunit 12A                                      | <i>Ppp1r12a</i> |              | 0.53             | 2.74E-04 |
| Protein phosphatase 1 regulatory subunit 12A                                      | <i>Ppp1r12a</i> | S873         | 0.81             | 0.041    |
| Protein phosphatase 1 regulatory subunit 12B                                      | <i>Ppp1r12b</i> |              | 0.38             | 0.011    |
| Protein phosphatase 1 regulatory subunit 14A                                      | <i>Ppp1r14a</i> |              | -0.91            | 5.77E-07 |
| Protein phosphatase 1 regulatory subunit 14B                                      | <i>Ppp1r14b</i> |              | 1.08             | 0.043    |
| Protein phosphatase 1 regulatory subunit 32                                       | <i>Ppp1r32</i>  | Y335         | 1.26             | 0.026    |
| Protein phosphatase 1 regulatory subunit 3A                                       | <i>Ppp1r3a</i>  |              | -2.75            | 0.001    |
| Protein phosphatase 1A                                                            | <i>Ppm1a</i>    |              | 0.37             | 0.042    |
| Protein phosphatase 1L                                                            | <i>Ppm1l</i>    |              | 2.19             | 1.49E-09 |
| Serine/threonine-protein phosphatase 2A 55 kDa regulatory subunit B alpha isoform | <i>Ppp2r2a</i>  |              | 0.36             | 0.004    |
| Serine/threonine-protein phosphatase 2A 56 kDa regulatory subunit epsilon isoform | <i>Ppp2r5e</i>  |              | 0.52             | 0.009    |
| Serine/threonine-protein phosphatase 2A 65 kDa regulatory subunit A beta isoform  | <i>Ppp2r1b</i>  |              | 0.47             | 0.002    |
| Serine/threonine-protein phosphatase 2B catalytic subunit alpha isoform           | <i>Ppp3ca</i>   |              | -0.55            | 4.54E-04 |
| Serine/threonine-protein phosphatase 5                                            | <i>Ppp5c</i>    |              | 0.41             | 0.001    |
| Serine/threonine-protein phosphatase 6 catalytic subunit                          | <i>Ppp6c</i>    |              | -1.45            | 0.009    |
| Serine/threonine-protein phosphatase 6 regulatory subunit 2                       | <i>Ppp6r2</i>   | S628         | 1.13             | 0.008    |
| Serine/threonine-protein phosphatase CPPED1                                       | <i>Cpped1</i>   |              | 1.09             | 0.001    |
| Serine/threonine-protein phosphatase PP1-alpha catalytic subunit                  | <i>Ppp1ca</i>   |              | -1.19            | 5.52E-05 |
| Serine/threonine-protein phosphatase PP1-beta catalytic subunit                   | <i>Ppp1cb</i>   |              | 0.42             | 4.88E-04 |
| Serine/threonine-protein phosphatase PP1-gamma catalytic subunit                  | <i>Ppp1cc</i>   |              | 0.38             | 0.004    |
| Tyrosine-protein phosphatase non-receptor type 11                                 | <i>Ptpn11</i>   |              | 0.38             | 0.010    |
| Tyrosine-protein phosphatase non-receptor type 21                                 | <i>Ptpn21</i>   |              | 0.94             | 0.001    |
| Tyrosine-protein phosphatase non-receptor type 23                                 | <i>Ptpn23</i>   | S985         | 2.22             | 0.009    |
| Tyrosine-protein phosphatase non-receptor type 23                                 | <i>Ptpn23</i>   | S986         | 1.72             | 0.013    |
| Tyrosine-protein phosphatase non-receptor type 23                                 | <i>Ptpn23</i>   | S1179        | 2.72             | 3.15E-05 |
| Uridine phosphorylase 2                                                           | <i>Upp2</i>     |              | 0.65             | 3.97E-04 |

**Supplemental Table IV B:** MS data of significantly changed phosphatases in CDC treated animals compared to placebo for total protein (n=3-4) and phosphorylation (n=6). Total protein and phosphorylation changes are presented in log2 foldchanges (log2FC). Listed p-values were calculated using the linear mixed effects model built into MSSTATs.

| Protein Name                                                                    | Gene Name       | Phospho-site | CDC vs placebo |          |
|---------------------------------------------------------------------------------|-----------------|--------------|----------------|----------|
|                                                                                 |                 |              | log2FC         | p-value  |
| [Pyruvate dehydrogenase [acetyl-transferring]]-phosphatase 1, mitochondrial     | <i>Pdp1</i>     |              | 0.14           | 0.001    |
| Diphosphoinositol polyphosphate phosphohydrolase 2                              | <i>Nudt4</i>    |              | -1.37          | 0.006    |
| Haloacid dehalogenase-like hydrolase domain-containing protein 2                | <i>Hdhd2</i>    |              | 1.58           | 0.006    |
| Inactive phospholipid phosphatase 7                                             | <i>Plpp7</i>    |              | 1.97           | 0.028    |
| Laforin                                                                         | <i>Epm2a</i>    |              | 0.59           | 0.009    |
| PH domain leucine-rich repeat protein phosphatase 1                             | <i>Phlpp1</i>   | S1598        | -1.57          | 0.041    |
| Phosphatidate phosphatase LPIN1                                                 | <i>Lpin1</i>    |              | -0.42          | 7.67E-07 |
| Phosphatidylinositol phosphatase SAC1                                           | <i>Sacm1l</i>   |              | 0.34           | 0.003    |
| Protein phosphatase 1 regulatory subunit 12A                                    | <i>Ppp1r12a</i> |              | -0.41          | 0.002    |
| Protein phosphatase 1 regulatory subunit 14A                                    | <i>Ppp1r14a</i> |              | 0.55           | 0.000    |
| Protein phosphatase 1 regulatory subunit 14B                                    | <i>Ppp1r14b</i> |              | -1.21          | 0.018    |
| Protein phosphatase 1 regulatory subunit 3A                                     | <i>Ppp1r3a</i>  |              | 2.36           | 0.003    |
| Protein phosphatase 1 regulatory subunit 7                                      | <i>Ppp1r7</i>   |              | 0.36           | 0.006    |
| Protein phosphatase 1L                                                          | <i>Ppm1l</i>    |              | -2.26          | 0.000    |
| Serine/threonine-protein phosphatase 2A 56 kDa regulatory subunit gamma isoform | <i>Ppp2r5c</i>  |              | -0.74          | 0.001    |

|                                                                         |               |      |       |          |
|-------------------------------------------------------------------------|---------------|------|-------|----------|
| Serine/threonine-protein phosphatase 2B catalytic subunit alpha isoform | <i>Ppp3ca</i> |      | 0.52  | 0.000    |
| Serine/threonine-protein phosphatase 6 catalytic subunit                | <i>Ppp6c</i>  |      | 1.07  | 0.025    |
| Serine/threonine-protein phosphatase 6 catalytic subunit                | <i>Ppp6c</i>  |      | 1.04  | 0.020    |
| Serine/threonine-protein phosphatase PP1-alpha catalytic subunit        | <i>Ppp1ca</i> |      | 0.58  | 0.002    |
| Serine/threonine-protein phosphatase PP1-alpha catalytic subunit        | <i>Ppp1ca</i> |      | 1.17  | 5.52E-05 |
| Serine/threonine-protein phosphatase PP1-beta catalytic subunit         | <i>Ppp1cb</i> |      | -0.28 | 0.008    |
| Tyrosine-protein phosphatase non-receptor type 21                       | <i>Ptpn21</i> |      | -0.72 | 0.006    |
| Tyrosine-protein phosphatase non-receptor type 23                       | <i>Ptpn23</i> | S986 | -0.95 | 0.038    |

**Supplemental Table V:** Output data of the GPS3.0 consensus sequence analysis of significant changed phosphor-peptides of HFpEF versus control and CDC versus placebo comparisons. Shown are the analyzed sequences and their score and cutoff values for shared consensus sequences with PKC and PKC isoforms.

| Protein Name                | Gene Name     | Phos pho-site | Peptide Modified Sequence                 | Input Sequence          | Posit ion | Co de | Kinase | Peptide          | Score  | Cutoff |
|-----------------------------|---------------|---------------|-------------------------------------------|-------------------------|-----------|-------|--------|------------------|--------|--------|
| Actin, aortic smooth muscle | <i>Acta2</i>  | S241          | S[+80]YELPDGQVITIGN ER                    | TAASSSLEKSYELPDG QVIT   | 11        | S     | PRKCA  | SSSSLEKSYELPDGQ  | 14.657 | 7.372  |
| Actin, aortic smooth muscle | <i>Acta2</i>  | S241          | S[+80]YELPDGQVITIGN ER                    | TAASSSLEKSYELPDG QVIT   | 11        | S     | PRKCB  | SSSSLEKSYELPDGQ  | 11.172 | 10.858 |
| Actin-binding LIM protein 1 | <i>Ablim1</i> | S499          | ST[+80]SQGS[+80]INSP VYSR                 | DVRDRMIHRSTSQGSINS PVY  | 11        | T     | PKC    | DRMIHRSTSQGSINS  | 1.855  | 1.416  |
| Actin-binding LIM protein 1 | <i>Ablim1</i> | S499          | ST[+80]SQGS[+80]INSP VYSR                 | RMIHRSTSQGSINSPV YSRHS  | 11        | S     | PKC    | HRSTSQGSINSPVYS  | 1.512  | 1.416  |
| Actin-binding LIM protein 1 | <i>Ablim1</i> | S499          | ST[+80]SQGS[+80]INSP VYSR                 | DVRDRMIHRSTSQGSINS PVY  | 11        | T     | PKCa   | DRMIHRSTSQGSINS  | 7.913  | 4.803  |
| Actin-binding LIM protein 1 | <i>Ablim1</i> | S499          | ST[+80]SQGS[+80]INSP VYSR                 | RMIHRSTSQGSINSPV YSRHS  | 11        | S     | PKCa   | HRSTSQGSINSPVYS  | 9.091  | 4.803  |
| Actin-binding LIM protein 1 | <i>Ablim1</i> | S499          | ST[+80]SQGS[+80]INSP VYSR                 | DVRDRMIHRSTSQGSINS PVY  | 11        | T     | PRKCA  | DRMIHRSTSQGSINS  | 14.808 | 7.372  |
| Actin-binding LIM protein 1 | <i>Ablim1</i> | S499          | ST[+80]SQGS[+80]INSP VYSR                 | RMIHRSTSQGSINSPV YSRHS  | 11        | S     | PRKCA  | HRSTSQGSINSPVYS  | 19.116 | 7.372  |
| Actin-binding LIM protein 1 | <i>Ablim1</i> | S499          | ST[+80]SQGS[+80]INSP VYSR                 | DVRDRMIHRSTSQGSINS PVY  | 11        | T     | PRKCD  | DRMIHRSTSQGSINS  | 3      | 2.514  |
| Actin-binding LIM protein 1 | <i>Ablim1</i> | S496          | STS[+80]QGS[+80]INSP VYSR                 | RMIHRSTSQGSINSPV YSRH   | 11        | S     | PKC    | HRSTSQGSINSPVYS  | 1.645  | 1.416  |
| Actin-binding LIM protein 1 | <i>Ablim1</i> | S496          | STS[+80]QGS[+80]INSP VYSR                 | QDVRDRMIHRSTSQGSINS PVY | 11        | S     | PKCa   | RDRMIHRSTSQGSIN  | 6.174  | 4.803  |
| Actin-binding LIM protein 1 | <i>Ablim1</i> | S496          | STS[+80]QGS[+80]INSP VYSR                 | RMIHRSTSQGSINSPV YSRH   | 11        | S     | PKCa   | HRSTSQGSINSPVYS  | 8.761  | 4.803  |
| Actin-binding LIM protein 1 | <i>Ablim1</i> | S496          | STS[+80]QGS[+80]INSP VYSR                 | QDVRDRMIHRSTSQGSINS PVY | 11        | S     | PRKCA  | RDRMIHRSTSQGSIN  | 15.465 | 7.372  |
| Actin-binding LIM protein 1 | <i>Ablim1</i> | S496          | STS[+80]QGS[+80]INSP VYSR                 | RMIHRSTSQGSINSPV YSRH   | 11        | S     | PRKCA  | HRSTSQGSINSPVYS  | 20.268 | 7.372  |
| Actin-binding LIM protein 1 | <i>Ablim1</i> | S475          | TLS[+80]PTPSAEGFQD GR                     | QSLGESPRTLSPTPSAEG FQD  | 11        | S     | PKC    | GESPRTLSPTPSAEG  | 1.644  | 1.416  |
| Actin-binding LIM protein 1 | <i>Ablim1</i> | S475          | TLS[+80]PTPSAEGFQD GR                     | QSLGESPRTLSPTPSAEG FQD  | 11        | S     | PKCa   | GESPRTLSPTPSAEG  | 7.287  | 4.803  |
| Actin-binding LIM protein 1 | <i>Ablim1</i> | S475          | TLS[+80]PTPSAEGFQD GR                     | QSLGESPRTLSPTPSAEG FQD  | 11        | S     | PRKCA  | GESPRTLSPTPSAEG  | 12.066 | 7.372  |
| A-kinase anchor protein 13  | <i>Akap1</i>  | S189          | 1 FLSHS[+80]TDSL NK                       | MSNTWKFLSHSTDSL NKICKV  | 11        | S     | PKC    | TWKFLSHSTDSL NKI | 2.214  | 1.416  |
| A-kinase anchor protein 13  | <i>Akap1</i>  | S189          | 1 FLSHS[+80]TDSL NK                       | MSNTWKFLSHSTDSL NKICKV  | 11        | S     | PRKCA  | TWKFLSHSTDSL NKI | 10.904 | 7.372  |
| A-kinase anchor protein 13  | <i>Akap1</i>  | S158          | 5 SFS[+80]LEGLTGGGGV GNKPSSSLEISSANSSEL R | LNADFNIRSFLEGLTGG GGV   | 11        | S     | PKCa   | DFNIRSFLEGLTGG   | 7.122  | 4.803  |
| A-kinase anchor protein 13  | <i>Akap1</i>  | S158          | 5 SFS[+80]LEGLTGGGGV GNKPSSSLEISSANSSEL R | LNADFNIRSFLEGLTGG GGV   | 11        | S     | PRKCA  | DFNIRSFLEGLTGG   | 15.985 | 7.372  |
| A-kinase anchor protein 13  | <i>Akap1</i>  | S152          | 3 SLS[+80]PFRR                            | SFLRNSMRSLSPFRRH SWGPG  | 11        | S     | PKC    | RNSMRSLSPFRRH W  | 1.765  | 1.416  |
| A-kinase anchor protein 13  | <i>Akap1</i>  | S152          | 3 SLS[+80]PFRR                            | SFLRNSMRSLSPFRRH SWGPG  | 11        | S     | PKCa   | RNSMRSLSPFRRH W  | 10.491 | 4.803  |
| A-kinase anchor protein 13  | <i>Akap1</i>  | S152          | 3 SLS[+80]PFRR                            | SFLRNSMRSLSPFRRH SWGPG  | 11        | S     | PRKCA  | RNSMRSLSPFRRH W  | 15.707 | 7.372  |
| A-kinase anchor protein 13  | <i>Akap1</i>  | S158          | 3 SFSLEGLT[+80]GGGGV GNKPSSSLEISSANSSEL R | AALNADFNIRSFLEGLT GGG   | 11        | S     | PRKCA  | NADFNIRSFLEGLT   | 14.702 | 7.372  |
| A-kinase anchor protein 13  | <i>Akap1</i>  | T159          | 0 SFSLEGLT[+80]GGGGV GNKPSSSLEISSANSSEL R | NIRSFLEGLTGGGGV GNKPS   | 11        | T     | PRKCA  | SFSLEGLTGGGGVGN  | 9.677  | 7.372  |
| A-kinase anchor protein 2   | <i>Akap2</i>  | S730          | TLS[+80]MIEEEIR                           | KLSRKQRTLMIIEEI RAAQ    | 11        | S     | PKC    | SRKQRTLMIIEEI R  | 5.154  | 1.416  |



|                                     |                 |      |                                                |                                                           |    |   |       |                                        |        |        |
|-------------------------------------|-----------------|------|------------------------------------------------|-----------------------------------------------------------|----|---|-------|----------------------------------------|--------|--------|
| A-kinase anchor protein 2           | <i>Akap2</i>    | S730 | TLS[+80]MIEEEIR                                | KLRSRKQRTLSMIEEEI<br>RAAQ                                 | 11 | S | PKCa  | SRKQRTLSMIEEEIR                        | 4.961  | 4.803  |
| A-kinase anchor protein 2           | <i>Akap2</i>    | S730 | TLS[+80]MIEEEIR<br>ATLPEADGERQS[+80]IL         | KLRSRKQRTLSMIEEEI<br>RAAQ<br>TLPEADGERQSILAIQN            | 11 | S | PRKCA | SRKQRTLSMIEEEIR                        | 14.758 | 7.372  |
| Alpha-actinin-2                     | <i>Actn2</i>    | S574 | AIQNEVEK<br>ATLPEADGERQS[+80]IL                | EVEK<br>TLPEADGERQSILAIQN                                 | 11 | S | PKC   | EADGERQSILAIQNE                        | 1.97   | 1.416  |
| Alpha-actinin-2                     | <i>Actn2</i>    | S574 | AIQNEVEK<br>ATLPEADGERQS[+80]IL                | EVEK<br>TLPEADGERQSILAIQN                                 | 11 | S | PKCa  | EADGERQSILAIQNE                        | 5.226  | 4.803  |
| Alpha-actinin-2                     | <i>Actn2</i>    | S574 | AIQNEVEK<br>ATLPEADGERQS[+80]IL                | EVEK<br>TLPEADGERQSILAIQN                                 | 11 | S | PRKCA | EADGERQSILAIQNE                        | 15.354 | 7.372  |
| Alpha-actinin-2                     | <i>Actn2</i>    | S574 | AIQNEVEK                                       | EVEK                                                      | 11 | S | PRKCB | EADGERQSILAIQNE                        | 12.828 | 10.858 |
| Alpha-crystallin B chain            | <i>Cryab</i>    | S59  | APS[+80]WIDTGLSEMR                             | LRPPSFLRAPSWIDTGL<br>SEMR                                 | 11 | S | PKC   | PSFLRAPSWIDTGLS                        | 2.581  | 1.416  |
| Alpha-crystallin B chain            | <i>Cryab</i>    | S59  | APS[+80]WIDTGLSEMR                             | LRPPSFLRAPSWIDTGL<br>SEMR                                 | 11 | S | PRKCA | PSFLRAPSWIDTGLS                        | 15.944 | 7.372  |
| Alpha-crystallin B chain            | <i>Cryab</i>    | S19  | RPFFPFHS[+80]PSR                               | WIRRPFFPFHSPSRLFD<br>QFFG                                 | 11 | S | PRKCA | RPFFPFHSPSRLFDQ                        | 9.556  | 7.372  |
| Band 4.1-like protein 1             | <i>Epb41l1</i>  | S782 | SLS[+80]PIIGK                                  | QTVATEIRSLSPIIGKDV<br>LTS                                 | 11 | S | PRKCA | ATEIRSLSPIIGKDV                        | 8.015  | 7.372  |
| CapZ-interacting protein            | <i>Rcsd1</i>    | S90  | AMVSPFHGS[+80]PPSTP<br>SSPGIR                  | GLKAMVSPFHSPSTP<br>SSPGI                                  | 11 | S | PRKCA | AMVSPFHSPSTPSS<br>SKSKDPGSPQPNQE       | 9.717  | 7.372  |
| CapZ-interacting protein            | <i>Rcsd1</i>    | S186 | SKDPGS[+80]PQPQNQE<br>AGADR                    | VFPKSKDPGSPQPNQ<br>EAGAD                                  | 11 | S | PKC   | A<br>SKSKDPGSPQPNQE                    | 1.687  | 1.416  |
| CapZ-interacting protein            | <i>Rcsd1</i>    | S186 | SKDPGS[+80]PQPQNQE<br>AGADR                    | VFPKSKDPGSPQPNQ<br>EAGAD                                  | 11 | S | PKCa  | A                                      | 6.265  | 4.803  |
| CapZ-interacting protein            | <i>Rcsd1</i>    | S186 | SKDPGS[+80]PQPQNQE<br>AGADR                    | VFPKSKDPGSPQPNQ<br>EAGAD                                  | 11 | S | PRKCA | A                                      | 14.571 | 7.372  |
| CapZ-interacting protein            | <i>Rcsd1</i>    | S68  | VELGQNGEEKS[+80]PS<br>STSHPPK                  | VELGQNGEEKSPSSTS<br>HPPKI                                 | 11 | S | PKCa  | GQNGEEKSPSSTSHP                        | 7.761  | 4.803  |
| CapZ-interacting protein            | <i>Rcsd1</i>    | S68  | VELGQNGEEKS[+80]PS<br>STSHPPK                  | VELGQNGEEKSPSSTS<br>HPPKI                                 | 11 | S | PRKCA | GQNGEEKSPSSTSHP                        | 14.46  | 7.372  |
| CapZ-interacting protein            | <i>Rcsd1</i>    | S68  | VELGQNGEEKS[+80]PS<br>STSHPPK                  | VELGQNGEEKSPSSTS<br>HPPKI                                 | 11 | S | PRKCB | GQNGEEKSPSSTSHP                        | 18.914 | 10.858 |
| CapZ-interacting protein            | <i>Rcsd1</i>    | S53  | VKSS[+80]PLIEK<br>SRTS[+80]VQTEDDQLI           | SHPPKIKVKSSPLIEKLQ<br>ANL<br>TEDFDVRSRTSVQTED<br>DQLIA    | 11 | S | PRKCA | PKIKVKSSPLIEKLQ<br>FDVRSRTSVQTEDD<br>Q | 11.404 | 7.372  |
| Catenin alpha-1                     | <i>Ctnna1</i>   | S657 | AGQSAR<br>SRTS[+80]VQTEDDQLI                   | Q<br>TEDFDVRSRTSVQTED<br>DQLIA                            | 11 | S | PKC   | Q<br>FDVRSRTSVQTEDD<br>Q               | 2.108  | 1.416  |
| Catenin alpha-1                     | <i>Ctnna1</i>   | S657 | AGQSAR<br>SRTS[+80]VQTEDDQLI                   | Q<br>TEDFDVRSRTSVQTED<br>DQLIA                            | 11 | S | PKCa  | Q<br>FDVRSRTSVQTEDD<br>Q               | 10.104 | 4.803  |
| Catenin alpha-1                     | <i>Ctnna1</i>   | S657 | AGQSAR<br>SRTS[+80]VQTEDDQLI                   | Q<br>TEDFDVRSRTSVQTED<br>DQLIA                            | 11 | S | PRKCA | Q<br>FDVRSRTSVQTEDD<br>Q               | 19.409 | 7.372  |
| Catenin alpha-1                     | <i>Ctnna1</i>   | S657 | AGQSAR<br>T[+80]SVQT[+80]EDDQ                  | Q<br>ETEDFDVRSRTSVQTE<br>DDQLI                            | 11 | S | PRKCD | Q                                      | 2.772  | 2.514  |
| Catenin alpha-1                     | <i>Ctnna1</i>   | T654 | LIAGQSAR<br>T[+80]SVQT[+80]EDDQ                | DDQLI<br>ETEDFDVRSRTSVQTE<br>DDQLI                        | 11 | T | PKC   | DFDVRRTSVQTEDD                         | 1.59   | 1.416  |
| Catenin alpha-1                     | <i>Ctnna1</i>   | T654 | LIAGQSAR<br>T[+80]SVQT[+80]EDDQ                | DDQLI<br>ETEDFDVRSRTSVQTE<br>DDQLI                        | 11 | T | PKCa  | DFDVRRTSVQTEDD                         | 9.461  | 4.803  |
| Catenin alpha-1                     | <i>Ctnna1</i>   | T654 | LIAGQSAR<br>T[+80]SVQT[+80]EDDQ                | DDQLI<br>ETEDFDVRSRTSVQTE<br>DDQLI                        | 11 | T | PRKCA | DFDVRRTSVQTEDD                         | 14.172 | 7.372  |
| Catenin alpha-1                     | <i>Ctnna1</i>   | T654 | LIAGQSAR<br>TPEELDDSD[+80]DFET[+80]EDFDVR      | FDVRSRTSVQTEDDQL<br>IAGQSAR<br>MIRTPPEELDDSDFETE<br>DFDVR | 11 | T | PRKCA | RSRTSVQTEDDQLIA                        | 9.354  | 7.372  |
| Catenin alpha-1                     | <i>Ctnna1</i>   | S643 | ELAGVLPQVHGS[+80]<br>WES[+80]LNEEWSAPP<br>ASSR | DFDVR<br>LAGVLPQVHGSWESL<br>NEEWSA                        | 11 | S | PRKCA | TPEELDDSDFETEDF<br>VLPQVHGSWESLNE<br>E | 8.081  | 7.372  |
| Cdc42 effector protein 1            | <i>Cdc42ep1</i> | S347 | ELAGVLPQVHGS[+80]<br>WES[+80]LNEEWSAPP<br>ASSR | LAGVLPQVHGSWESL<br>NEEWSA                                 | 11 | S | PRKCA | VLPQVHGSWESLNE<br>E                    | 8.49   | 7.372  |
| Cdc42 effector protein 1            | <i>Cdc42ep1</i> | S347 | ELAGVLPQVHGS[+80]<br>WES[+80]LNEEWSAPP<br>ASSR | VLPQVHGSWESLNEE<br>WSAPP                                  | 11 | S | PRKCA | QVHGSWESLNEEWS<br>A                    | 16.606 | 7.372  |
| CLIP-associating protein 2          | <i>Clasp2</i>   | S581 | VLNTGS[+80]DVEEAVA<br>DALK                     | VSAMRVLNTGSDVEE<br>AVADAL                                 | 11 | S | PRKCA | MRVLNTGSDVEEAV<br>A                    | 11.364 | 7.372  |
| Cordon-bleu protein-like 1          | <i>Cobll1</i>   | S666 | ENHLTAS[+80]PGPDQK                             | KSSRENHLTASPGPDQ<br>KLNQP                                 | 11 | S | PRKCA | RENHLTASPGPDQKL                        | 9.263  | 7.372  |
| Cordon-bleu protein-like 1          | <i>Cobll1</i>   | S666 | ENHLTAS[+80]PGPDQK                             | QSSRENHLTASPGPD<br>QKSNQP                                 | 11 | S | PRKCA | RENHLTASPGPDQKS                        | 8.742  | 7.372  |
| Cysteine and glycine-rich protein 3 | <i>Csrp3</i>    | S111 | AATTSNPSKFS[+80]AK                             | AATTSNPSKFSKAFGE<br>SEKCP                                 | 11 | S | PKC   | TSNPSKFSKAFGESE                        | 4.432  | 1.416  |
| Cysteine and glycine-rich protein 3 | <i>Csrp3</i>    | S111 | AATTSNPSKFS[+80]AK                             | AATTSNPSKFSKAFGE<br>SEKCP                                 | 11 | S | PKCa  | TSNPSKFSKAFGESE                        | 10.63  | 4.803  |

|                                              |                |       |                       |                        |    |   |       |                   |        |        |
|----------------------------------------------|----------------|-------|-----------------------|------------------------|----|---|-------|-------------------|--------|--------|
| Cysteine and glycine-rich protein 3          | <i>Csrp3</i>   | S111  | AATTSNPSKFS[+80]AK    | AATSNPSKFSKFAKFGSEKCP  | 11 | S | PKCd  | TSNPSKFSKFAKFGESE | 3.824  | 3.771  |
| Cysteine and glycine-rich protein 3          | <i>Csrp3</i>   | S111  | AATTSNPSKFS[+80]AK    | AATSNPSKFSKFAKFGSEKCP  | 11 | S | PRKCA | TSNPSKFSKFAKFGESE | 18.924 | 7.372  |
| Cysteine and glycine-rich protein 3          | <i>Csrp3</i>   | S111  | AATTSNPSKFS[+80]AK    | AATSNPSKFSKFAKFGSEKCP  | 11 | S | PRKCB | TSNPSKFSKFAKFGESE | 14.362 | 10.858 |
| Cytoplasmic linker-associated protein 1      | <i>Clasp1</i>  | S1088 | NSSNAGVGS[+80]PSNTIGR | LKNSSNAGVGSPTSNTIGRTPS | 11 | S | PRKCA | SSNAGVGSPTSNTIGR  | 15.566 | 7.372  |
| Desmin                                       | <i>Des</i>     | S25   | RTFGGAPGFS[+80]LGS    | FGGAPGFSLGSPLSSPVFPRA  | 11 | S | PKC   | EKSAVRPSPSPERS    | 1.813  | 1.416  |
| Desmin                                       | <i>Des</i>     | S25   | RTFGGAPGFS[+80]LGS    | RRTFGGAPGFSLGSPLSSPVF  | 11 | S | PKCa  | APGFSLGSPLSSPVF   | 5.152  | 4.803  |
| Desmin                                       | <i>Des</i>     | S25   | RTFGGAPGFS[+80]LGS    | FGGAPGFSLGSPLSSPVFPRA  | 11 | S | PKCa  | EKSAVRPSPSPERS    | 7.743  | 4.803  |
| Desmin                                       | <i>Des</i>     | S25   | RTFGGAPGFS[+80]LGS    | RRTFGGAPGFSLGSPLSSPVF  | 11 | S | PRKCA | APGFSLGSPLSSPVF   | 12.48  | 7.372  |
| Desmin                                       | <i>Des</i>     | S25   | RTFGGAPGFS[+80]LGS    | FGGAPGFSLGSPLSSPVFPRA  | 11 | S | PRKCA | EKSAVRPSPSPERS    | 11.374 | 7.372  |
| Desmin                                       | <i>Des</i>     | S25   | RTFGGAPGFS[+80]LGS    | FGGAPGFSLGSPLSSPVFPRA  | 11 | S | PRKCB | EKSAVRPSPSPERS    | 15.224 | 10.858 |
| Desmin                                       | <i>Des</i>     | S300  | S[+80]KVS[+80]DLTQAN  | EAEWYKSKVSDLTQAN       | 11 | S | PKC   | EWYKSKVSDLTQAN    | 2.097  | 1.416  |
| Desmin                                       | <i>Des</i>     | S300  | S[+80]KVS[+80]DLTQAN  | EAEWYKSKVSDLTQAN       | 11 | S | PKCa  | EWYKSKVSDLTQAN    | 6.287  | 4.803  |
| Desmin                                       | <i>Des</i>     | S300  | S[+80]KVS[+80]DLTQAN  | NISEAEWYKSKVSDLTQAN    | 11 | S | PRKCA | EAEWYKSKVSDLTQAN  | 13.904 | 7.372  |
| Desmin                                       | <i>Des</i>     | S300  | S[+80]KVS[+80]DLTQAN  | EAEWYKSKVSDLTQAN       | 11 | S | PRKCA | EWYKSKVSDLTQAN    | 11.46  | 7.372  |
| Desmin                                       | <i>Des</i>     | S25   | TFGGAPGFS[+80]LGSP    | APGFSLGSPLSSPVFPRA     | 11 | S | PRKCA | FSLGSPLSSPVFPRA   | 8.591  | 7.372  |
| Drebrin                                      | <i>Dbn1</i>    | S142  | LSS[+80]PVLHR         | RLSNGLARLSSPVLHRL      | 11 | S | PKC   | NGLARLSSPVLHRL    | 2.057  | 1.416  |
| Drebrin                                      | <i>Dbn1</i>    | S142  | LSS[+80]PVLHR         | RLSNGLARLSSPVLHRL      | 11 | S | PRKCA | NGLARLSSPVLHRL    | 7.707  | 7.372  |
| Erythrocyte membrane protein band 4.1-like 2 | <i>Epb41l2</i> | S57   | ASQPGPTAESQS[+80]S    | SQPGPTAESQSSPHRRKRGKD  | 11 | S | PKC   | GPTAESQSSPHRRKR   | 1.682  | 1.416  |
| Erythrocyte membrane protein band 4.1-like 2 | <i>Epb41l2</i> | S57   | ASQPGPTAESQS[+80]S    | SQPGPTAESQSSPHRRKRGKD  | 11 | S | PKCa  | GPTAESQSSPHRRKR   | 11.196 | 4.803  |
| Erythrocyte membrane protein band 4.1-like 2 | <i>Epb41l2</i> | S57   | ASQPGPTAESQS[+80]S    | SQPGPTAESQSSPHRRKRGKD  | 11 | S | PRKCA | GPTAESQSSPHRRKR   | 12.732 | 7.372  |
| Erythrocyte membrane protein band 4.1-like 2 | <i>Epb41l2</i> | S57   | ASQPGPTAESQS[+80]S    | SQPGPTAESQSSPHRRKRGKD  | 11 | S | PRKCB | GPTAESQSSPHRRKR   | 13.672 | 10.858 |
| FH1/FH2 domain-containing protein 1          | <i>Fhod1</i>   | S141  | RSLFS[+80]LK          | EDKD                   | 11 | S | PKC   | ELRRSLFLSKQIFQE   | 4.333  | 1.416  |
| FH1/FH2 domain-containing protein 1          | <i>Fhod1</i>   | S141  | RSLFS[+80]LK          | SGPELRRSLFLSKQIFQ      | 11 | S | PKCa  | ELRRSLFLSKQIFQE   | 9.661  | 4.803  |
| FH1/FH2 domain-containing protein 1          | <i>Fhod1</i>   | S141  | RSLFS[+80]LK          | EDKD                   | 11 | S | PRKCA | ELRRSLFLSKQIFQE   | 23.859 | 7.372  |
| Filamin-A-interacting protein 1              | <i>Filip1</i>  | S979  | AMS[+80]PVTITTISR     | DPTLGPAMSPVTITISRE     | 11 | S | PKCa  | LGPAMSPVTITTI     | 6.104  | 4.803  |
| Filamin-A-interacting protein 1              | <i>Filip1</i>  | S979  | AMS[+80]PVTITTISR     | DPTLGPAMSPVTITISRE     | 11 | S | PRKCA | LGPAMSPVTITTI     | 11.652 | 7.372  |
| Filamin-C                                    | <i>Finc</i>    | S2234 | ERLGS[+80]FGSITR      | GDFLGRERLGSFGSITR      | 11 | S | PKC   | LGRERLGSFGSITRQ   | 2.103  | 1.416  |
| Filamin-C                                    | <i>Finc</i>    | S2234 | ERLGS[+80]FGSITR      | GDFLGRERLGSFGSITR      | 11 | S | PKCa  | LGRERLGSFGSITRQ   | 7.961  | 4.803  |
| Filamin-C                                    | <i>Finc</i>    | S2234 | ERLGS[+80]FGSITR      | GDFLGRERLGSFGSITR      | 11 | S | PRKCA | LGRERLGSFGSITRQ   | 16.01  | 7.372  |
| Filamin-C                                    | <i>Finc</i>    | S2237 | LGSFGS[+80]ITR        | LGRERLGSFGSITRQQ       | 11 | S | PKC   | ERLGSFGSITRQQEG   | 1.968  | 1.416  |
| Filamin-C                                    | <i>Finc</i>    | S2237 | LGSFGS[+80]ITR        | LGRERLGSFGSITRQQ       | 11 | S | PKCa  | ERLGSFGSITRQQEG   | 10.7   | 4.803  |
| Filamin-C                                    | <i>Finc</i>    | S2237 | LGSFGS[+80]ITR        | LGRERLGSFGSITRQQ       | 11 | S | PRKCA | ERLGSFGSITRQQEG   | 19.641 | 7.372  |

|                                              |                  |       |                                    |                           |    |   |       |                     |        |        |
|----------------------------------------------|------------------|-------|------------------------------------|---------------------------|----|---|-------|---------------------|--------|--------|
| Filamin-C                                    | <i>Fln</i>       | S2633 | GASYSSIPKFS[+80]SDASK              | GASYSSIPKFSSDASKV<br>VTRG | 11 | S | PKCa  | YSSIPKFSSDASKVV     | 7.074  | 4.803  |
| Filamin-C                                    | <i>Fln</i>       | S2633 | GASYSSIPKFS[+80]SDASK              | GASYSSIPKFSSDASKV<br>VTRG | 11 | S | PRKCA | YSSIPKFSSDASKVV     | 14.773 | 7.372  |
| Filamin-C                                    | <i>Fln</i>       | S2633 | GASYSSIPKFS[+80]SDASK              | GASYSSIPKFSSDASKV<br>VTRG | 11 | S | PRKCB | YSSIPKFSSDASKVV     | 12.897 | 10.858 |
| Formin-like protein 1                        | <i>Fmn1</i>      | S965  | EAAADTSGREPPAPKS<br>[+80]PPK       | SGREPPAPKSPPKAR<br>RQQMD  | 11 | S | PKC   | EPPAPKSPPKARRQ      | 3.024  | 1.416  |
| Formin-like protein 1                        | <i>Fmn1</i>      | S965  | EAAADTSGREPPAPKS<br>[+80]PPK       | SGREPPAPKSPPKAR<br>RQQMD  | 11 | S | PKCa  | EPPAPKSPPKARRQ      | 8.652  | 4.803  |
| Formin-like protein 1                        | <i>Fmn1</i>      | S965  | EAAADTSGREPPAPKS<br>[+80]PPK       | SGREPPAPKSPPKAR<br>RQQMD  | 11 | S | PRKCA | EPPAPKSPPKARRQ      | 15.874 | 7.372  |
| Fructose-bisphosphate aldolase A             | <i>Aldoa</i>     | S36   | IVAPGKGILAADES[+80]<br>TGSIAK      | PGKGILAADESTGSIK<br>RLQS  | 11 | S | PKC   | GILAADESTGSIK       | 2.899  | 1.416  |
| Fructose-bisphosphate aldolase A             | <i>Aldoa</i>     | S36   | IVAPGKGILAADES[+80]<br>TGSIAK      | PGKGILAADESTGSIK<br>RLQS  | 11 | S | PRKCA | GILAADESTGSIK       | 9.828  | 7.372  |
| Fructose-bisphosphate aldolase A             | <i>Aldoa</i>     | T37   | IVAPGKGILAADEST[+80]<br>]GSIK      | GKGILAADESTGSIK<br>LQSI   | 11 | T | PKC   | ILAADESTGSIK        | 2.107  | 1.416  |
| Fructose-bisphosphate aldolase A             | <i>Aldoa</i>     | T37   | IVAPGKGILAADEST[+80]<br>]GSIK      | GKGILAADESTGSIK<br>LQSI   | 11 | T | PRKCA | ILAADESTGSIK        | 8.879  | 7.372  |
| Fructose-bisphosphate aldolase A             | <i>Aldoa</i>     | T52   | RLQSIGTENT[+80]EEN<br>RR           | KRLQSIGTENTEENRRF<br>YRQL | 11 | T | PKCa  | QSIGTENTEENRRF      | 4.948  | 4.803  |
| Fructose-bisphosphate aldolase A             | <i>Aldoa</i>     | T52   | RLQSIGTENT[+80]EEN<br>RR           | KRLQSIGTENTEENRRF<br>YRQL | 11 | T | PRKCA | QSIGTENTEENRRF      | 13.682 | 7.372  |
| Heat shock protein beta-1                    | <i>Hspb1</i>     | S86   | QLS[+80]SGVSEIR                    | AFSRALNRQLSSGVSEI<br>RQTA | 11 | S | PKC   | RALNRQLSSGVSEIR     | 1.985  | 1.416  |
| Heat shock protein beta-1                    | <i>Hspb1</i>     | S86   | QLS[+80]SGVSEIR                    | AFSRALNRQLSSGVSEI<br>RQTA | 11 | S | PKCa  | RALNRQLSSGVSEIR     | 5.23   | 4.803  |
| Heat shock protein beta-1                    | <i>Hspb1</i>     | S86   | QLS[+80]SGVSEIR                    | AFSRALNRQLSSGVSEI<br>RQTA | 11 | S | PRKCA | RALNRQLSSGVSEIR     | 13.596 | 7.372  |
| Heat shock protein beta-1                    | <i>Hspb1</i>     | S13   | S[+80]PSWEPFRDWYP<br>AHSR          | ERRVPFLLRSPSWEPF<br>RDWY  | 11 | S | PRKCA | VPFLLRSPSWEPFR      | 8.672  | 7.372  |
| Heat shock protein beta-1                    | <i>Hspb1</i>     | S15   | SPS[+80]WEPFR                      | RVPFLLRSPSWEPFR<br>DWYPA  | 11 | S | PKC   | FLLRSPSWEPFRDW      | 2.445  | 1.416  |
| Heat shock protein beta-1                    | <i>Hspb1</i>     | S15   | SPS[+80]WEPFR                      | RVPFLLRSPSWEPFR<br>DWYPA  | 11 | S | PKCa  | FLLRSPSWEPFRDW      | 6.591  | 4.803  |
| Heat shock protein beta-1                    | <i>Hspb1</i>     | S15   | SPS[+80]WEPFR                      | RVPFLLRSPSWEPFR<br>DWYPA  | 11 | S | PRKCA | FLLRSPSWEPFRDW      | 15.414 | 7.372  |
| Heat shock protein beta-3                    | <i>Hspb3</i>     | T64   | ALAEDSDSAGT[+80]PP<br>GEGK         | ALAEDSDSAGTPPEG<br>KSRFQ  | 11 | T | PRKCA | EDSDSAGTPPEGK       | 9.192  | 7.372  |
| Influenza virus NS1A-binding protein homolog | <i>Ivns1a bp</i> | S246  | LLDGNPLDGQAEVFGS[+80]<br>]DDHIFVQK | PLDGQAEVFGSDDHIF<br>QVQK  | 11 | S | PRKCA | GQAEVFGSDDHIF       | 9.101  | 7.372  |
| Influenza virus NS1A-binding protein homolog | <i>Ivns1a bp</i> | S336  | S[+80]LSFEMQPDELLE<br>KPMSPMQYAR   | SPTSTPKLSKLSFEMQ<br>PDEL  | 11 | S | PKCa  | STPKLSKLSFEMQ       | 7.448  | 4.803  |
| Influenza virus NS1A-binding protein homolog | <i>Ivns1a bp</i> | S336  | S[+80]LSFEMQPDELLE<br>KPMSPMQYAR   | SPTSTPKLSKLSFEMQ<br>PDEL  | 11 | S | PRKCA | STPKLSKLSFEMQ       | 14.99  | 7.372  |
| Influenza virus NS1A-binding protein homolog | <i>Ivns1a bp</i> | S338  | SLS[+80]FEMQPDELLE<br>KPMSPMQYAR   | TSTPKLSKLSFEMQ<br>DELLE   | 11 | S | PKC   | PKLSKLSFEMQPDE      | 2.957  | 1.416  |
| Influenza virus NS1A-binding protein homolog | <i>Ivns1a bp</i> | S338  | SLS[+80]FEMQPDELLE<br>KPMSPMQYAR   | TSTPKLSKLSFEMQ<br>DELLE   | 11 | S | PKCa  | PKLSKLSFEMQPDE      | 7.9    | 4.803  |
| Influenza virus NS1A-binding protein homolog | <i>Ivns1a bp</i> | S338  | SLS[+80]FEMQPDELLE<br>KPMSPMQYAR   | TSTPKLSKLSFEMQ<br>DELLE   | 11 | S | PRKCA | PKLSKLSFEMQPDE      | 20.081 | 7.372  |
| Influenza virus NS1A-binding protein homolog | <i>Ivns1a bp</i> | S338  | SLS[+80]FEMQPDELLE<br>KPMSPMQYAR   | TSTPKLSKLSFEMQ<br>DELLE   | 11 | S | PRKCB | PKLSKLSFEMQPDE      | 12.655 | 10.858 |
| Junction plakoglobin                         | <i>Jup</i>       | T78   | KTTYTQGVPSQGDLE<br>YQMST[+80]TAR   | SQGDLEYQMSTTARA<br>KRVREA | 11 | T | PKC   | DLEYQMSTTARAKR<br>V | 3.206  | 1.416  |
| Junction plakoglobin                         | <i>Jup</i>       | T78   | KTTYTQGVPSQGDLE<br>YQMST[+80]TAR   | SQGDLEYQMSTTARA<br>KRVREA | 11 | T | PKCa  | DLEYQMSTTARAKR<br>V | 11.648 | 4.803  |
| Junction plakoglobin                         | <i>Jup</i>       | T78   | KTTYTQGVPSQGDLE<br>YQMST[+80]TAR   | SQGDLEYQMSTTARA<br>KRVREA | 11 | T | PRKCA | DLEYQMSTTARAKR<br>V | 15.884 | 7.372  |

|                                                         |               |      |                                                  |                                                        |    |   |       |                 |        |        |
|---------------------------------------------------------|---------------|------|--------------------------------------------------|--------------------------------------------------------|----|---|-------|-----------------|--------|--------|
| KN motif and ankyrin repeat domain-containing protein 1 | <i>Kank1</i>  | S323 | SYS[+80]AGNASQLELLS<br>R                         | EACGVRKRSYSAGNAS<br>QLELL                              | 11 | S | PKC   | GVRKRSYSAGNASQL | 3.912  | 1.416  |
| KN motif and ankyrin repeat domain-containing protein 1 | <i>Kank1</i>  | S323 | SYS[+80]AGNASQLELLS<br>R                         | EACGVRKRSYSAGNAS<br>QLELL                              | 11 | S | PKCa  | GVRKRSYSAGNASQL | 7.757  | 4.803  |
| KN motif and ankyrin repeat domain-containing protein 1 | <i>Kank1</i>  | S323 | SYS[+80]AGNASQLELLS<br>R                         | EACGVRKRSYSAGNAS<br>QLELL<br>KVWQRGTPGSSPYAS<br>PRQSPW | 11 | S | PRKCA | GVRKRSYSAGNASQL | 13.758 | 7.372  |
| Leiomodlin-2                                            | <i>Lmod2</i>  | S394 | GTPGSS[+80]PYASPR                                | KVWQRGTPGSSPYAS<br>PRQSPW                              | 11 | S | PKCa  | QRGTPGSSPYASPRQ | 5.278  | 4.803  |
| Leiomodlin-2                                            | <i>Lmod2</i>  | S394 | GTPGSS[+80]PYASPR                                | KVWQRGTPGSSPYAS<br>PRQSPW                              | 11 | S | PRKCA | QRGTPGSSPYASPRQ | 10.742 | 7.372  |
| Leiomodlin-2                                            | <i>Lmod2</i>  | S399 | GTPGSSPYAS[+80]PR                                | RGTPGSSPYASPRQSP<br>WSSPK                              | 11 | S | PKCa  | PGSSPYASPRQSPWS | 5.47   | 4.803  |
| Leiomodlin-2                                            | <i>Lmod2</i>  | S399 | GTPGSSPYAS[+80]PR                                | RGTPGSSPYASPRQSP<br>WSSPK                              | 11 | S | PRKCA | PGSSPYASPRQSPWS | 19.338 | 7.372  |
| Leiomodlin-2                                            | <i>Lmod2</i>  | S514 | MEESS[+80]RPS[+80]T<br>PQR                       | SVQEKKMEESSRPSTP<br>QRSAH                              | 11 | S | PKC   | EKKMEESSRPSTPQR | 2.181  | 1.416  |
| Leiomodlin-2                                            | <i>Lmod2</i>  | S514 | MEESS[+80]RPS[+80]T<br>PQR                       | EKKMEESSRPSTPQRS<br>AHENL                              | 11 | S | PKC   | MEESSRPSTPQRS   | 3.361  | 1.416  |
| Leiomodlin-2                                            | <i>Lmod2</i>  | S514 | MEESS[+80]RPS[+80]T<br>PQR                       | SVQEKKMEESSRPSTP<br>QRSAH                              | 11 | S | PKCa  | EKKMEESSRPSTPQR | 7.087  | 4.803  |
| Leiomodlin-2                                            | <i>Lmod2</i>  | S514 | MEESS[+80]RPS[+80]T<br>PQR                       | EKKMEESSRPSTPQRS<br>AHENL                              | 11 | S | PKCa  | MEESSRPSTPQRS   | 13.861 | 4.803  |
| Leiomodlin-2                                            | <i>Lmod2</i>  | S514 | MEESS[+80]RPS[+80]T<br>PQR                       | SVQEKKMEESSRPSTP<br>QRSAH                              | 11 | S | PRKCA | EKKMEESSRPSTPQR | 14.247 | 7.372  |
| Leiomodlin-2                                            | <i>Lmod2</i>  | S514 | MEESS[+80]RPS[+80]T<br>PQR                       | EKKMEESSRPSTPQRS<br>AHENL                              | 11 | S | PRKCA | MEESSRPSTPQRS   | 22.434 | 7.372  |
| Leiomodlin-2                                            | <i>Lmod2</i>  | S514 | MEESS[+80]RPS[+80]T<br>PQR                       | SVQEKKMEESSRPSTP<br>QRSAH                              | 11 | S | PRKCB | EKKMEESSRPSTPQR | 14.414 | 10.858 |
| Leiomodlin-2                                            | <i>Lmod2</i>  | S514 | MEESS[+80]RPS[+80]T<br>PQR                       | EKKMEESSRPSTPQRS<br>AHENL                              | 11 | S | PRKCB | MEESSRPSTPQRS   | 12.414 | 10.858 |
| Leiomodlin-2                                            | <i>Lmod2</i>  | S514 | MEESS[+80]RPST[+80]<br>PQR                       | KKMEESSRPSTPQRSA<br>HENLM                              | 11 | T | PKC   | EESSRPSTPQRSAHE | 2.341  | 1.416  |
| Leiomodlin-2                                            | <i>Lmod2</i>  | S514 | MEESS[+80]RPST[+80]<br>PQR                       | KKMEESSRPSTPQRSA<br>HENLM                              | 11 | T | PKCa  | EESSRPSTPQRSAHE | 9.443  | 4.803  |
| Leiomodlin-2                                            | <i>Lmod2</i>  | S514 | MEESS[+80]RPST[+80]<br>PQR                       | KKMEESSRPSTPQRSA<br>HENLM                              | 11 | T | PRKCA | EESSRPSTPQRSAHE | 18.556 | 7.372  |
| Leiomodlin-2                                            | <i>Lmod2</i>  | S405 | QSPWS[+80]SPK                                    | YASPRQSPWSSPKVSK<br>KVHTG                              | 10 | S | PKC   | SPRQSPWSSPKVSKK | 1.438  | 1.416  |
| Leiomodlin-2                                            | <i>Lmod2</i>  | S405 | QSPWS[+80]SPK                                    | YASPRQSPWSSPKVSK<br>KVHTG                              | 10 | S | PKCa  | SPRQSPWSSPKVSKK | 6.757  | 4.803  |
| Leiomodlin-2                                            | <i>Lmod2</i>  | S405 | QSPWS[+80]SPK                                    | YASPRQSPWSSPKVSK<br>KVHTG                              | 10 | S | PRKCA | SPRQSPWSSPKVSKK | 10.778 | 7.372  |
| Leiomodlin-2                                            | <i>Lmod2</i>  | S406 | QSPWSS[+80]PK                                    | YASPRQSPWSSPKVSK<br>KVHTG                              | 11 | S | PKC   | PRQSPWSSPKVSKKV | 2.884  | 1.416  |
| Leiomodlin-2                                            | <i>Lmod2</i>  | S406 | QSPWSS[+80]PK                                    | YASPRQSPWSSPKVSK<br>KVHTG                              | 11 | S | PKCa  | PRQSPWSSPKVSKKV | 7.826  | 4.803  |
| Leiomodlin-2                                            | <i>Lmod2</i>  | S406 | QSPWSS[+80]PK                                    | YASPRQSPWSSPKVSK<br>KVHTG                              | 11 | S | PRKCA | PRQSPWSSPKVSKKV | 14.111 | 7.372  |
| Leiomodlin-2                                            | <i>Lmod2</i>  | S422 | SRPPS[+80]PVAPPPPP<br>PPPPLPHMLPPPPPP<br>APPLPEK | KVHTGRSRPPSPVAPP<br>PPPPP                              | 11 | S | PKCa  | TGRSRPPSPVAPPP  | 6.739  | 4.803  |
| Leiomodlin-2                                            | <i>Lmod2</i>  | S422 | SRPPS[+80]PVAPPPPP<br>PPPPLPHMLPPPPPP<br>APPLPEK | KVHTGRSRPPSPVAPP<br>PPPPP                              | 11 | S | PRKCA | TGRSRPPSPVAPPP  | 13.51  | 7.372  |
| LIM and calponin homology domains-containing protein 1  | <i>Limch1</i> | S752 | MPETDQLHLPNLSQA<br>DS[+80]PSSEK                  | HLPNLSQADSPSSEK<br>SPAST                               | 11 | S | PKCa  | NLNSQADSPSSEKSP | 6.143  | 4.803  |
| LIM and calponin homology domains-containing protein 1  | <i>Limch1</i> | S752 | MPETDQLHLPNLSQA<br>DS[+80]PSSEK                  | HLPNLSQADSPSSEK<br>SPAST                               | 11 | S | PRKCA | NLNSQADSPSSEKSP | 14.015 | 7.372  |
| LIM and calponin homology domains-containing protein 1  | <i>Limch1</i> | T215 | SRQT[+80]PS[+80]PDV<br>VLR                       | SFGSRSRQTSPDVVL<br>RGSSD                               | 9  | T | PKC   | FGRSRQTSPDVVL   | 1.468  | 1.416  |
| LIM and calponin homology domains-containing protein 1  | <i>Limch1</i> | T215 | SRQT[+80]PS[+80]PDV<br>VLR                       | LDSFGSRSRQTSPDV<br>VLRG                                | 13 | S | PKCa  | SRSRQTSPDVVLRG  | 5.491  | 4.803  |

|                                                        |               |      |                                         |                        |    |   |       |                 |        |        |
|--------------------------------------------------------|---------------|------|-----------------------------------------|------------------------|----|---|-------|-----------------|--------|--------|
| LIM and calponin homology domains-containing protein 1 | <i>Limch1</i> | T215 | SRQT[+80]PS[+80]PDV VLR                 | SFGSRSRQTSPDVVL RGSSD  | 9  | T | PRKCA | FGSRSRQTSPDVVL  | 8.737  | 7.372  |
| LIM and calponin homology domains-containing protein 1 | <i>Limch1</i> | T215 | SRQT[+80]PS[+80]PDV VLR                 | LDSFGSRSRQTSPDV VLRG   | 13 | S | PRKCA | SRSRQTSPDVVLRG  | 14.884 | 7.372  |
| LIM and calponin homology domains-containing protein 1 | <i>Limch1</i> | S303 | SWSTATS[+80]PLGGER PFR                  | EFRKSWSTATSPLGGE RPFY  | 11 | S | PKCa  | KSWSTATSPLGGERP | 5.983  | 4.803  |
| LIM and calponin homology domains-containing protein 1 | <i>Limch1</i> | S303 | SWSTATS[+80]PLGGER PFR                  | EYRKSWSTATSPLGGE RPFY  | 11 | S | PKCa  | KSWSTATSPLGGERP | 5.983  | 4.803  |
| LIM and calponin homology domains-containing protein 1 | <i>Limch1</i> | S303 | SWSTATS[+80]PLGGER PFR                  | EFRKSWSTATSPLGGE RPFY  | 11 | S | PRKCA | KSWSTATSPLGGERP | 10.192 | 7.372  |
| LIM and calponin homology domains-containing protein 1 | <i>Limch1</i> | S303 | SWSTATS[+80]PLGGER PFR                  | EYRKSWSTATSPLGGE RPFY  | 11 | S | PRKCA | KSWSTATSPLGGERP | 10.192 | 7.372  |
| LIM domain and actin-binding protein 1                 | <i>Lima1</i>  | S488 | GENEETLGRPAQPPSAG ETPHS[+80]PGVEDAPI AK | QPPSAGETPHSPGVED APIAK | 11 | S | PRKCA | SAGETPHSPGVEDAP | 8.379  | 7.372  |
| LIM domain-binding protein 3                           | <i>Ldb3</i>   | S44  | AAQSQLS[+80]QGDLV VAIDGVNTDTMTHLEA QNK  | PGSKAAQSQLSQGDL VVAIDG | 11 | S | PRKCA | KAAQSQLSQGDLV A | 11.237 | 7.372  |
| LIM domain-binding protein 3                           | <i>Ldb3</i>   | S121 | DPSLDTNSSLATPS[+80] PSPEAR              | LDTNSSLATPSPEAR ASPG   | 11 | S | PKC   | NSSLATPSPEARA   | 1.783  | 1.416  |
| LIM domain-binding protein 3                           | <i>Ldb3</i>   | S121 | DPSLDTNSSLATPS[+80] PSPEAR              | LDTNSSLATPSPEAR ASPG   | 11 | S | PKCa  | NSSLATPSPEARA   | 7.6    | 4.803  |
| LIM domain-binding protein 3                           | <i>Ldb3</i>   | S121 | DPSLDTNSSLATPS[+80] PSPEAR              | LDTNSSLATPSPEAR ASPG   | 11 | S | PRKCA | NSSLATPSPEARA   | 13.212 | 7.372  |
| LIM domain-binding protein 3                           | <i>Ldb3</i>   | S123 | DPSLDTNSSLATPSPS[+ 80]PEAR              | TNSSLATPSPEARAS PGTS   | 11 | S | PKCa  | SLATPSPEARASP   | 6.591  | 4.803  |
| LIM domain-binding protein 3                           | <i>Ldb3</i>   | S123 | DPSLDTNSSLATPSPS[+ 80]PEAR              | TNSSLATPSPEARAS PGTS   | 11 | S | PRKCA | SLATPSPEARASP   | 14.535 | 7.372  |
| LIM domain-binding protein 3                           | <i>Ldb3</i>   | S123 | DPSLDTNSSLATPSPS[+ 80]PEAR              | TNSSLATPSPEARAS PGTS   | 11 | S | PRKCB | SLATPSPEARASP   | 11.569 | 10.858 |
| Macrophage-capping protein                             | <i>Capg</i>   | S341 | YSPNTQVEILPQGRES[+ 80]PIFK              | QVEILPQGRESPIFKQF FKNW | 11 | S | PKC   | ILPQGRESPIFKQFF | 1.938  | 1.416  |
| Macrophage-capping protein                             | <i>Capg</i>   | S341 | YSPNTQVEILPQGRES[+ 80]PIFK              | QVEILPQGRESPIFKQF FKNW | 11 | S | PRKCA | ILPQGRESPIFKQFF | 10.662 | 7.372  |
| Misshapen-like kinase 1                                | <i>Mink1</i>  | S765 | SDSVLPASHGHLQAGS [+80]LER               | ASHGHLQAGSLERN RNRVGA  | 11 | S | PKC   | GHLQAGSLERNRN R | 1.417  | 1.416  |
| Misshapen-like kinase 1                                | <i>Mink1</i>  | S765 | SDSVLPASHGHLQAGS [+80]LER               | ASHGHLQAGSLERN RNRVGA  | 11 | S | PKCa  | GHLQAGSLERNRN R | 12.252 | 4.803  |
| Misshapen-like kinase 1                                | <i>Mink1</i>  | S765 | SDSVLPASHGHLQAGS [+80]LER               | ASHGHLQAGSLERN RNRVGA  | 11 | S | PRKCA | GHLQAGSLERNRN R | 22.222 | 7.372  |
| Misshapen-like kinase 1                                | <i>Mink1</i>  | S765 | SDSVLPASHGHLQAGS [+80]LER               | ASHGHLQAGSLERN RNRVGA  | 11 | S | PRKCB | GHLQAGSLERNRN R | 13.586 | 10.858 |
| Myomesin-2                                             | <i>Myom 2</i> | S535 | NYVVLWDPPS[+80]PR                       | NYVVLWDPPSPRGK EPLMYF  | 11 | S | PKC   | VLSWDPPSPRGKEPL | 2.173  | 1.416  |
| Myomesin-2                                             | <i>Myom 2</i> | S535 | NYVVLWDPPS[+80]PR                       | NYVVLWDPPSPRGK EPLMYF  | 11 | S | PKCa  | VLSWDPPSPRGKEPL | 7.857  | 4.803  |
| Myomesin-2                                             | <i>Myom 2</i> | S535 | NYVVLWDPPS[+80]PR                       | NYVVLWDPPSPRGK EPLMYF  | 11 | S | PRKCA | VLSWDPPSPRGKEPL | 19.232 | 7.372  |
| Myopalladin                                            | <i>Mybn</i>   | S622 | ISEPS[+80]SPVKEPPP V LAKPK              | NGQEARISEPSSPVKE PPPVL | 11 | S | PKC   | EARISEPSSPVKEPP | 1.461  | 1.416  |
| Myopalladin                                            | <i>Mybn</i>   | S622 | ISEPS[+80]SPVKEPPP V LAKPK              | NGQEARISEPSSPVKE PPPVL | 11 | S | PKCa  | EARISEPSSPVKEPP | 7.422  | 4.803  |
| Myopalladin                                            | <i>Mybn</i>   | S622 | ISEPS[+80]SPVKEPPP V LAKPK              | NGQEARISEPSSPVKE PPPVL | 11 | S | PRKCA | EARISEPSSPVKEPP | 14.253 | 7.372  |
| Myopalladin                                            | <i>Mybn</i>   | S622 | ISEPS[+80]SPVKEPPP V LAKPK              | NGQEARISEPSSPVKE PPPVL | 11 | S | PRKCB | EARISEPSSPVKEPP | 12.603 | 10.858 |
| Myopalladin                                            | <i>Mybn</i>   | S623 | ISEPSS[+80]PVKEPPP V LAKPK              | GQEARISEPSSPVKEPP PVLA | 11 | S | PKCa  | ARISEPSSPVKEPPP | 6.083  | 4.803  |
| Myopalladin                                            | <i>Mybn</i>   | S623 | ISEPSS[+80]PVKEPPP V LAKPK              | GQEARISEPSSPVKEPP PVLA | 11 | S | PRKCA | ARISEPSSPVKEPPP | 12.409 | 7.372  |
| Myopalladin                                            | <i>Mybn</i>   | S737 | TVS[+80]KESLLMTHPS TQGR                 | NTPQTIQRTVSKESSL MTHPS | 11 | S | PKC   | QTIQRTVSKESSLMT | 1.54   | 1.416  |
| Myopalladin                                            | <i>Mybn</i>   | S737 | TVS[+80]KESLLMTHPS TQGR                 | NTPQTIQRTVSKESSL MTHPS | 11 | S | PKCa  | QTIQRTVSKESSLMT | 5.73   | 4.803  |
| Myopalladin                                            | <i>Mybn</i>   | S737 | TVS[+80]KESLLMTHPS TQGR                 | NTPQTIQRTVSKESSL MTHPS | 11 | S | PRKCA | QTIQRTVSKESSLMT | 16.773 | 7.372  |

|               |               |       |                                       |                            |    |   |       |                                  |        |        |
|---------------|---------------|-------|---------------------------------------|----------------------------|----|---|-------|----------------------------------|--------|--------|
| Myosin XVIIIb | <i>Myo18b</i> | S2298 | VKS[+80]PLGAEGNAG<br>ATGGLSR          | GDLSLRTRVKSPLGAE<br>GNAGA  | 11 | S | PKC   | SLRTRVKSPLGAEGN                  | 1.575  | 1.416  |
| Myosin XVIIIb | <i>Myo18b</i> | S2298 | VKS[+80]PLGAEGNAG<br>ATGGLSR          | GDLSLRTRVKSPLGAE<br>GNAGA  | 11 | S | PKCa  | SLRTRVKSPLGAEGN                  | 6.409  | 4.803  |
| Myosin XVIIIb | <i>Myo18b</i> | S2298 | VKS[+80]PLGAEGNAG<br>ATGGLSR          | GDLSLRTRVKSPLGAE<br>GNAGA  | 11 | S | PRKCA | SLRTRVKSPLGAEGN<br>RAMSKANSEVAQW | 16.035 | 7.372  |
| Myosin-1      | <i>Myh1</i>   | S1373 | ANS[+80]EVAQWR                        | ELQRAMSKANSEVAQ<br>WRTKYE  | 11 | S | PKC   | RT<br>RAMSKANSEVAQW              | 1.79   | 1.416  |
| Myosin-1      | <i>Myh1</i>   | S1373 | ANS[+80]EVAQWR                        | ELQRAMSKANSEVAQ<br>WRTKYE  | 11 | S | PKCa  | RT<br>RAMSKANSEVAQW              | 6.526  | 4.803  |
| Myosin-1      | <i>Myh1</i>   | S1373 | ANS[+80]EVAQWR                        | ELQRAMSKANSEVAQ<br>WRTKYE  | 11 | S | PRKCA | RT                               | 16.04  | 7.372  |
| Myosin-11     | <i>Myh11</i>  | S1951 | RVIENTDGS[+80]EEEM<br>DAR             | GRRVIENTDGSEEM<br>DARDSD   | 11 | S | PRKCA | VIENTDGSEEMDAR                   | 13.51  | 7.372  |
| Myosin-6      | <i>Myh6</i>   | S1089 | EFDIS[+80]QQNSK                       | EKLKKEFDISQQNSKI<br>EDEQ   | 11 | S | PKC   | KKKEFDISQQNSKIE                  | 3.119  | 1.416  |
| Myosin-6      | <i>Myh6</i>   | S1089 | EFDIS[+80]QQNSK                       | EKLKKEFDISQQNSKI<br>EDEQ   | 11 | S | PRKCA | KKKEFDISQQNSKIE                  | 18.343 | 7.372  |
| Myosin-6      | <i>Myh6</i>   | S1235 | EKSEFKLELDDVTS[+80]<br>NMEQIIK        | EFKLELDDVTSNMEQII<br>KAKA  | 11 | S | PRKCA | LELDDVTSNMEQIIK                  | 14.778 | 7.372  |
| Myosin-6      | <i>Myh6</i>   | S1270 | VKLEEAQRS[+80]LNDF<br>TTQR            | YRVKLEEAQRSLNDF<br>TQRAK   | 11 | S | PKC   | KLEEAQRSLNDFTTQ                  | 2.097  | 1.416  |
| Myosin-6      | <i>Myh6</i>   | S1270 | VKLEEAQRS[+80]LNDF<br>TTQR            | YRVKLEEAQRSLNDF<br>TQRAK   | 11 | S | PKCa  | KLEEAQRSLNDFTTQ                  | 7.978  | 4.803  |
| Myosin-6      | <i>Myh6</i>   | S1270 | VKLEEAQRS[+80]LNDF<br>TTQR            | YRVKLEEAQRSLNDF<br>TQRAK   | 11 | S | PRKCA | KLEEAQRSLNDFTTQ                  | 21.475 | 7.372  |
| Myosin-7      | <i>Myh7</i>   | T1019 | ALQEAHQALDDLQAE<br>EDKVNT[+80]LTK     | DLQAEEDKVNTLTAK<br>VKLEQ   | 11 | T | PKC   | AEEDKVNTLTAKVK                   | 3.141  | 1.416  |
| Myosin-7      | <i>Myh7</i>   | T1019 | ALQEAHQALDDLQAE<br>EDKVNT[+80]LTK     | DLQAEEDKVNTLTAK<br>VKLEQ   | 11 | T | PKC   | AEEDKVNTLTAKVK                   | 2.714  | 1.416  |
| Myosin-7      | <i>Myh7</i>   | T1019 | ALQEAHQALDDLQAE<br>EDKVNT[+80]LTK     | DLQAEEDKVNTLTAK<br>VKLEQ   | 11 | T | PKCa  | AEEDKVNTLTAKVK                   | 7.896  | 4.803  |
| Myosin-7      | <i>Myh7</i>   | T1019 | ALQEAHQALDDLQAE<br>EDKVNT[+80]LTK     | DLQAEEDKVNTLTAK<br>VKLEQ   | 11 | T | PKCa  | AEEDKVNTLTAKVK                   | 9.578  | 4.803  |
| Myosin-7      | <i>Myh7</i>   | T1019 | ALQEAHQALDDLQAE<br>EDKVNT[+80]LTK     | DLQAEEDKVNTLTAK<br>VKLEQ   | 11 | T | PRKCA | AEEDKVNTLTAKVK                   | 17.783 | 7.372  |
| Myosin-7      | <i>Myh7</i>   | T1019 | ALQEAHQALDDLQAE<br>EDKVNT[+80]LTK     | DLQAEEDKVNTLTAK<br>VKLEQ   | 11 | T | PRKCA | AEEDKVNTLTAKVK                   | 19.207 | 7.372  |
| Myosin-7      | <i>Myh7</i>   | T210  | DQT[+80]PGKGTLEDQI<br>IQANPALEAFGNAK  | AIGDRSKKQTPGKGT<br>LEDQI   | 11 | T | PKC   | DRSKKQTPGKGTLE                   | 2.899  | 1.416  |
| Myosin-7      | <i>Myh7</i>   | T210  | DQT[+80]PGKGTLEDQI<br>IQANPALEAFGNAK  | AIGDRSKKQTPGKGT<br>LEDQI   | 11 | T | PRKCA | DRSKKQTPGKGTLE                   | 13.268 | 7.372  |
| Myosin-7      | <i>Myh7</i>   | S1222 | EKS[+80]EFKLELDDVTS<br>NMEQIIK        | RVKQKLEKEKSEFKLEL<br>DDVT  | 11 | S | PKC   | QKLEKEKSEFKLEL                   | 2.704  | 1.416  |
| Myosin-7      | <i>Myh7</i>   | S1222 | EKS[+80]EFKLELDDVTS<br>NMEQIIK        | RVKQKLEKEKSEFKLEL<br>DDVT  | 11 | S | PKCa  | QKLEKEKSEFKLEL                   | 6.796  | 4.803  |
| Myosin-7      | <i>Myh7</i>   | S1222 | EKS[+80]EFKLELDDVTS<br>NMEQIIK        | RVKQKLEKEKSEFKLEL<br>DDVT  | 11 | S | PRKCA | QKLEKEKSEFKLEL                   | 18.051 | 7.372  |
| Myosin-7      | <i>Myh7</i>   | S1222 | EKS[+80]EFKLELDDVTS<br>NMEQIIK        | RVKQKLEKEKSEFKLEL<br>DDVT  | 11 | S | PRKCB | QKLEKEKSEFKLEL                   | 11.569 | 10.858 |
| Myosin-7      | <i>Myh7</i>   | T1309 | GKLTYT[+80]QQLEDL<br>K R              | SQLTRGKLTYYQQLED<br>LKRQL  | 11 | T | PKC   | TRGKLTYYQQLEDL                   | 2.005  | 1.416  |
| Myosin-7      | <i>Myh7</i>   | T1309 | GKLTYT[+80]QQLEDL<br>K R              | SQLTRGKLTYYQQLED<br>LKRQL  | 11 | T | PRKCA | TRGKLTYYQQLEDL                   | 10.838 | 7.372  |
| Myosin-7      | <i>Myh7</i>   | S1102 | IEDEQALGS[+80]QLQK                    | ARIEDEQALGSQKQK<br>LKEQ    | 11 | S | PKC   | EDEQALGSQKQK                     | 2.904  | 1.416  |
| Myosin-7      | <i>Myh7</i>   | S1102 | IEDEQALGS[+80]QLQK                    | ARIEDEQALGSQKQK<br>LKEQ    | 11 | S | PKCa  | EDEQALGSQKQK                     | 5.313  | 4.803  |
| Myosin-7      | <i>Myh7</i>   | S1102 | IEDEQALGS[+80]QLQK                    | ARIEDEQALGSQKQK<br>LKEQ    | 11 | S | PRKCA | EDEQALGSQKQK                     | 13.217 | 7.372  |
| Myosin-7      | <i>Myh7</i>   | T215  | KDQTPGKGT[+80]LED<br>QIIQANPALEAFGNAK | SKKDQTPGKGTLEDQII<br>QANP  | 11 | T | PKC   | DQTPGKGTLEDQII                   | 2.605  | 1.416  |
| Myosin-7      | <i>Myh7</i>   | T215  | KDQTPGKGT[+80]LED<br>QIIQANPALEAFGNAK | SKKDQTPGKGTLEDQII<br>QANP  | 11 | T | PRKCA | DQTPGKGTLEDQII                   | 17.146 | 7.372  |
| Myosin-7      | <i>Myh7</i>   | S642  | KGS[+80]SFQTVSALHR                    | DKGKGGKAKKSSSFQT<br>VSALHR | 11 | S | PKC   | KGKAKKSSSFQTVSA                  | 7.796  | 1.416  |
| Myosin-7      | <i>Myh7</i>   | S642  | KGS[+80]SFQTVSALHR                    | DKGKGGKAKKSSSFQT<br>VSALHR | 11 | S | PKC   | KGGKKKSSSFQTVSA                  | 6.778  | 1.416  |
| Myosin-7      | <i>Myh7</i>   | S642  | KGS[+80]SFQTVSALHR                    | DKGKGGKAKKSSSFQT<br>VSALHR | 11 | S | PKCa  | KGKAKKSSSFQTVSA                  | 10.013 | 4.803  |
| Myosin-7      | <i>Myh7</i>   | S642  | KGS[+80]SFQTVSALHR                    | DKGKGGKAKKSSSFQT<br>VSALHR | 11 | S | PKCa  | KGGKKKSSSFQTVSA                  | 10.013 | 4.803  |

|                                        |               |      |                            |                         |    |   |       |                   |        |        |
|----------------------------------------|---------------|------|----------------------------|-------------------------|----|---|-------|-------------------|--------|--------|
| Myosin-7                               | <i>Myh7</i>   | S642 | KGSS[+80]SFQTVSALHR        | DKGKGKAKKGGSSFQTVSALHR  | 11 | S | PRKCA | KGKAKKGGSSFQTVSA  | 19.455 | 7.372  |
| Myosin-7                               | <i>Myh7</i>   | S642 | KGSS[+80]SFQTVSALHR        | GKGGKGGKKKGGSSFQTVSALHR | 11 | S | PRKCA | KGKGGKGGSSFQTVSA  | 19.455 | 7.372  |
| Myosin-7                               | <i>Myh7</i>   | S643 | KGSS[+80]FQTVSALHR         | KGKKGKAKKGGSSFQTVSALHRE | 11 | S | PKC   | GKAKKGGSSFQTVSAL  | 7.548  | 1.416  |
| Myosin-7                               | <i>Myh7</i>   | S643 | KGSS[+80]FQTVSALHR         | KGKGGKGGKGGSSFQTVSALHRE | 11 | S | PKC   | GGKGGKGGSSFQTVSAL | 9.417  | 1.416  |
| Myosin-7                               | <i>Myh7</i>   | S643 | KGSS[+80]FQTVSALHR         | KGKKGKAKKGGSSFQTVSALHRE | 11 | S | PKCa  | GKAKKGGSSFQTVSAL  | 10.922 | 4.803  |
| Myosin-7                               | <i>Myh7</i>   | S643 | KGSS[+80]FQTVSALHR         | KGKGGKGGKGGSSFQTVSALHRE | 11 | S | PKCa  | GGKGGKGGSSFQTVSAL | 10.922 | 4.803  |
| Myosin-7                               | <i>Myh7</i>   | S643 | KGSS[+80]FQTVSALHR         | KGKKGKAKKGGSSFQTVSALHRE | 11 | S | PKCd  | GKAKKGGSSFQTVSAL  | 4.514  | 3.771  |
| Myosin-7                               | <i>Myh7</i>   | S643 | KGSS[+80]FQTVSALHR         | KGKGGKGGKGGSSFQTVSALHRE | 11 | S | PKCd  | GGKGGKGGSSFQTVSAL | 4.514  | 3.771  |
| Myosin-7                               | <i>Myh7</i>   | S643 | KGSS[+80]FQTVSALHR         | KGKKGKAKKGGSSFQTVSALHRE | 11 | S | PRKCA | GKAKKGGSSFQTVSAL  | 24.783 | 7.372  |
| Myosin-7                               | <i>Myh7</i>   | S643 | KGSS[+80]FQTVSALHR         | KGKGGKGGKGGSSFQTVSALHRE | 11 | S | PRKCA | GGKGGKGGSSFQTVSAL | 24.783 | 7.372  |
| Myosin-7                               | <i>Myh7</i>   | S643 | KGSS[+80]FQTVSALHR         | KGKKGKAKKGGSSFQTVSALHRE | 11 | S | PRKCB | GKAKKGGSSFQTVSAL  | 11.224 | 10.858 |
| Myosin-7                               | <i>Myh7</i>   | S643 | KGSS[+80]FQTVSALHR         | KGKGGKGGKGGSSFQTVSALHRE | 11 | S | PRKCB | GGKGGKGGSSFQTVSAL | 11.224 | 10.858 |
| Myosin-7                               | <i>Myh7</i>   | S643 | KGSS[+80]FQTVSALHR         | KGKKGKAKKGGSSFQTVSALHRE | 11 | S | PRKCD | GKAKKGGSSFQTVSAL  | 2.895  | 2.514  |
| Myosin-7                               | <i>Myh7</i>   | S643 | KGSS[+80]FQTVSALHR         | KGKGGKGGKGGSSFQTVSALHRE | 11 | S | PRKCD | GGKGGKGGSSFQTVSAL | 2.895  | 2.514  |
| Myosin-7                               | <i>Myh7</i>   | S149 | LKNAYEES[+80]LEHLET        | LFKLNAYEESLEHLET        | 11 | S | PRKCA | LKNAYEESLEHLET    | 12.975 | 7.372  |
| Myosin-7                               | <i>Myh7</i>   | 1    | FKR                        | FKRE                    | 11 | S | PRKCB | LKNAYEESLEHLET    | 15.466 | 10.858 |
| Myosin-7                               | <i>Myh7</i>   | S149 | LKNAYEES[+80]LEHLET        | LFKLNAYEESLEHLET        | 11 | S | PRKCB | YDNHLGKSNNFQKPR   | 15.838 | 7.372  |
| Myosin-7                               | <i>Myh7</i>   | 1    | FKR                        | FKRE                    | 11 | S | PRKCB | YDNHLGKSNNFQKPR   | 15.838 | 7.372  |
| Myosin-7                               | <i>Myh7</i>   | S560 | QKPR                       | AKLYDNHLGKSNNFQKPRNIK   | 11 | S | PRKCA | R                 | 15.838 | 7.372  |
| Myosin-7                               | <i>Myh7</i>   | S114 | SDLS[+80]RELEEISER         | AKVEKLRSDLSRELEEISERL   | 11 | S | PKC   | EKLRSDLSRELEEIS   | 1.949  | 1.416  |
| Myosin-7                               | <i>Myh7</i>   | 0    | SDLS[+80]RELEEISER         | AKAEKQRSDLRSRELEEISERL  | 11 | S | PKC   | EKQRSDLRSRELEEIS  | 2.503  | 1.416  |
| Myosin-7                               | <i>Myh7</i>   | S114 | SDLS[+80]RELEEISER         | AKVEKLRSDLSRELEEISERL   | 11 | S | PRKCA | EKLRSDLSRELEEIS   | 13.061 | 7.372  |
| Myosin-7                               | <i>Myh7</i>   | 0    | SDLS[+80]RELEEISER         | AKAEKQRSDLRSRELEEISERL  | 11 | S | PRKCA | EKQRSDLRSRELEEIS  | 13.061 | 7.372  |
| Myosin-7                               | <i>Myh7</i>   | S147 | SDLS[+80]RELEEISER         | ESSQKEARSLSTELFKLKNAY   | 11 | S | PKC   | QKEARSLSTELFKLK   | 1.808  | 1.416  |
| Myosin-7                               | <i>Myh7</i>   | 8    | SLS[+80]TELFK              | ESSQKEARSLSTELFKLKNAY   | 11 | S | PKCa  | QKEARSLSTELFKLK   | 5.452  | 4.803  |
| Myosin-7                               | <i>Myh7</i>   | S147 | SLS[+80]TELFK              | ESSQKEARSLSTELFKLKNAY   | 11 | S | PRKCA | QKEARSLSTELFKLK   | 12.101 | 7.372  |
| Myosin-7                               | <i>Myh7</i>   | 8    | SLS[+80]TELFK              | ESSQKEARSLSTELFKLKNAY   | 11 | S | PRKCA | QKEARSLSTELFKLK   | 12.101 | 7.372  |
| Myosin-7                               | <i>Myh7</i>   | T160 | VVDSLQTSLDAET[+80]         | DSLQTSLDAETRSRNEALRVK   | 11 | T | PKC   | QTSLDAETRSRNEAL   | 2.076  | 1.416  |
| Myosin-7                               | <i>Myh7</i>   | 5    | RSRNEALR                   | ALRVK                   | 11 | T | PKC   | QTSLDAETRSRNEAL   | 2.076  | 1.416  |
| Myosin-7                               | <i>Myh7</i>   | T160 | VVDSLQTSLDAET[+80]         | DSLQTSLDAETRSRNEALRVK   | 11 | T | PKCa  | QTSLDAETRSRNEAL   | 4.804  | 4.803  |
| Myosin-7                               | <i>Myh7</i>   | 5    | RSRNEALR                   | ALRVK                   | 11 | T | PKCa  | QTSLDAETRSRNEAL   | 4.804  | 4.803  |
| Myosin-7                               | <i>Myh7</i>   | T160 | VVDSLQTSLDAET[+80]         | DSLQTSLDAETRSRNEALRVK   | 11 | T | PRKCA | QTSLDAETRSRNEAL   | 16.545 | 7.372  |
| Myosin-7                               | <i>Myh7</i>   | 5    | RSRNEALR                   | ALRVK                   | 11 | T | PRKCA | QTSLDAETRSRNEAL   | 16.545 | 7.372  |
| Myosin-7                               | <i>Myh7</i>   | S194 | KGTGDCS[+80]DEEVD          | RIVRKGTDGDCSDEEVDGKADG  | 11 | S | PRKCA | RKGTGDCSDEEVDGK   | 7.884  | 7.372  |
| Myosin-9                               | <i>Myh9</i>   | 4    | GKADGADAK                  | GKADG                   | 11 | S | PRKCA | K                 | 7.884  | 7.372  |
| Myosin-binding protein C, cardiac-type | <i>Mybpc3</i> | S302 | DS[+80]FRRDSKLEAPEEDVWEILR | DFSSLLKKRDSFRRDSKLEAP   | 11 | S | PKC   | SLLKKRDSFRRDSKL   | 14.263 | 1.416  |
| Myosin-binding protein C, cardiac-type | <i>Mybpc3</i> | S302 | DS[+80]FRRDSKLEAPEEDVWEILR | DFSSLLKKRDSFRRDSKLEAP   | 11 | S | PKCa  | SLLKKRDSFRRDSKL   | 26.913 | 4.803  |
| Myosin-binding protein C, cardiac-type | <i>Mybpc3</i> | S302 | DS[+80]FRRDSKLEAPEEDVWEILR | DFSSLLKKRDSFRRDSKLEAP   | 11 | S | PKCd  | SLLKKRDSFRRDSKL   | 6.027  | 3.771  |
| Myosin-binding protein C, cardiac-type | <i>Mybpc3</i> | S302 | DS[+80]FRRDSKLEAPEEDVWEILR | DFSSLLKKRDSFRRDSKLEAP   | 11 | S | PRKCA | SLLKKRDSFRRDSKL   | 35.813 | 7.372  |
| Myosin-binding protein C, cardiac-type | <i>Mybpc3</i> | S302 | DS[+80]FRRDSKLEAPEEDVWEILR | DFSSLLKKRDSFRRDSKLEAP   | 11 | S | PRKCB | SLLKKRDSFRRDSKL   | 23.621 | 10.858 |

|                                               |               |      |                                                                 |                                                                                    |    |   |       |                                       |        |        |
|-----------------------------------------------|---------------|------|-----------------------------------------------------------------|------------------------------------------------------------------------------------|----|---|-------|---------------------------------------|--------|--------|
| Myosin-binding protein C, cardiac-type        | <i>Mybpc3</i> | S302 | DS[+80]FRRDSKLEAPA<br>EEDVWEILR<br>IDGSNLEGGSQAPST[+80]PPNTPDPR | DFSSLLKKRDSFRRDSK<br>LEAP<br>LEGGSQAPSTPPNTP<br>DPRSP<br>SQQAPSTPPNTPDPRS<br>PPNPE | 11 | S | PRKCD | SLKKRDSFRRDSKL<br>GSQQAPSTPPNTPD<br>P | 4.719  | 2.514  |
| Myozenin-2                                    | <i>Myoz2</i>  | T107 | IDGSNLEGGSQAPST<br>PNT[+80]PDPR                                 | SQQAPSTPPNTPDPRS<br>PPNPE                                                          | 11 | T | PRKCA |                                       | 11.641 | 7.372  |
| Myozenin-2                                    | <i>Myoz2</i>  | T111 |                                                                 |                                                                                    | 11 | T | PRKCA | APSTPPNTPDPRSP                        | 10.187 | 7.372  |
| Myristoylated alanine-rich C-kinase substrate | <i>Marcks</i> | T143 | AEDGAAPSPSSET[+80]<br>PK                                        | DGAAPSPSSETPKKKK<br>KRFSF                                                          | 11 | T | PKC   | APSPSSETPKKKKKR                       | 5.719  | 1.416  |
| Myristoylated alanine-rich C-kinase substrate | <i>Marcks</i> | T143 | AEDGAAPSPSSET[+80]<br>PK                                        | DGAAPSPSSETPKKKK<br>KRFSF                                                          | 11 | T | PKCa  | APSPSSETPKKKKKR                       | 17.696 | 4.803  |
| Myristoylated alanine-rich C-kinase substrate | <i>Marcks</i> | T143 | AEDGAAPSPSSET[+80]<br>PK                                        | DGAAPSPSSETPKKKK<br>KRFSF                                                          | 11 | T | PRKCA | APSPSSETPKKKKKR                       | 18.51  | 7.372  |
| Nebulin-related-anchoring protein             | <i>Nrap</i>   | S275 | GVAS[+80]PVGAEGTM<br>TK                                         | QYHREMKGVASPVGA<br>EGTMTK                                                          | 11 | S | PRKCA | REMGKVASPVGAEG<br>T                   | 11.136 | 7.372  |
| Nebulin-related-anchoring protein             | <i>Nrap</i>   | S169 | RGLGIQGAS[+80]VETE<br>AVELGDHR                                  | NRRGLGIQGASVETEA<br>VELGD                                                          | 11 | S | PKCa  | GLGIQGASVETEAVE                       | 5.052  | 4.803  |
| Nebulin-related-anchoring protein             | <i>Nrap</i>   | S169 | RGLGIQGAS[+80]VETE<br>AVELGDHR                                  | NRRGLGIQGASVETEA<br>VELGD                                                          | 11 | S | PRKCA | GLGIQGASVETEAVE                       | 14.894 | 7.372  |
| Nexilin                                       | <i>Nexn</i>   | S345 | GVS[+80]QESLTPGK                                                | DDSPEIYKGVQSLETP<br>GKLE                                                           | 11 | S | PKCa  | PEIYKGVQSLETPG                        | 5.443  | 4.803  |
| Nexilin                                       | <i>Nexn</i>   | S345 | GVS[+80]QESLTPGK<br>GVSQES[+80]LTPGKLEI                         | DDSPEIYKGVQSLETP<br>GKLE<br>PEIYKGVQSLETPGKLE                                      | 11 | S | PRKCA | PEIYKGVQSLETPG                        | 14.869 | 7.372  |
| Nexilin                                       | <i>Nexn</i>   | S348 | NFEQLLR<br>GVSQES[+80]LTPGKLEI                                  | EINF<br>PEIYKGVQSLETPGKLE                                                          | 11 | S | PKCa  | YKGVQSLETPGKLE                        | 5.183  | 4.803  |
| Nexilin                                       | <i>Nexn</i>   | S348 | NFEQLLR<br>KREDEEEEGS[+80]IV                                    | EINF<br>KREDEEEEGSIVNGS                                                            | 11 | S | PRKCA | YKGVQSLETPGKLE                        | 12.96  | 7.372  |
| Nexilin                                       | <i>Nexn</i>   | S544 | NGSTTEDEEQTR<br>KREDEEEEGS[+80]IV                               | TTEDE<br>KREDEEEEGSIVNGS                                                           | 11 | S | PKC   | DDEEEEGSIVNGSTT                       | 2.038  | 1.416  |
| Nexilin                                       | <i>Nexn</i>   | S544 | NGSTTEDEEQTR<br>KREDEEEEGS[+80]IV                               | TTEDE<br>KREDEEEEGSIVNGS                                                           | 11 | S | PKCa  | DDEEEEGSIVNGSTT                       | 5.104  | 4.803  |
| Nexilin                                       | <i>Nexn</i>   | S544 | NGSTTEDEEQTR<br>KREDEEEEGS[+80]IV                               | TTEDE<br>KREDEEEEGSIVNGS                                                           | 11 | S | PRKCA | DDEEEEGSIVNGSTT                       | 16.732 | 7.372  |
| Nexilin                                       | <i>Nexn</i>   | S544 | NGSTTEDEEQTR                                                    | TTEDE<br>ARRSMVLDDDSPEIYK                                                          | 11 | S | PRKCB | DDEEEEGSIVNGSTT                       | 13.362 | 10.858 |
| Nexilin                                       | <i>Nexn</i>   | S330 | SMVLDDDS[+80]PEIYK<br>LKLS[+80]PEWGPTEAP                        | AVSQE<br>PAYLDKRLKLSPEWGP                                                          | 11 | S | PRKCA | SMVLDDDSPEIYKAV                       | 9.803  | 7.372  |
| Obscurin                                      | <i>Obscn</i>  | S660 | EFPGEA VSEDEYR                                                  | TEAPE                                                                              | 11 | S | PKC   | LDKRLKLSPEWGPTE                       | 2.124  | 1.416  |
| Obscurin                                      | <i>Obscn</i>  | S660 | LKLS[+80]PEWGPTEAP                                              | PAYLDKRLKLSPEWGP                                                                   | 11 | S | PRKCA | LDKRLKLSPEWGPTE                       | 9.253  | 7.372  |
| Obscurin                                      | <i>Obscn</i>  | S454 | EFPGEA VSEDEYR<br>S[+80]ASPRRPGLLAPE                            | TEAPE<br>KSPSRSPRRSASPRRP                                                          | 11 | S | PKC   | SRSPRRSASPRRPG                        | 3.617  | 1.416  |
| Obscurin                                      | <i>Obscn</i>  | S454 | EFPGEA VSEDEYR<br>S[+80]ASPRRPGLLAPE                            | TEAPE<br>KSPSRSPRRSASPRRP                                                          | 11 | S | PKCa  | SRSPRRSASPRRPG                        | 11.787 | 4.803  |
| Obscurin                                      | <i>Obscn</i>  | S454 | EFPGEA VSEDEYR<br>S[+80]ASPRRPGLLAPE                            | TEAPE<br>KSPSRSPRRSASPRRP                                                          | 11 | S | PKCd  | SRSPRRSASPRRPG                        | 4.365  | 3.771  |
| Obscurin                                      | <i>Obscn</i>  | S454 | EFPGEA VSEDEYR<br>S[+80]ASPRRPGLLAPE                            | TEAPE<br>KSPSRSPRRSASPRRP                                                          | 11 | S | PRKCA | SRSPRRSASPRRPG                        | 16.621 | 7.372  |
| Obscurin                                      | <i>Obscn</i>  | S454 | EFPGEA VSEDEYR<br>S[+80]ASPRRPGLLAPE                            | TEAPE<br>KSPSRSPRRSASPRRP                                                          | 11 | S | PRKCB | SRSPRRSASPRRPG                        | 12.603 | 10.858 |
| Obscurin                                      | <i>Obscn</i>  | S454 | EFPGEA VSEDEYR<br>S[+80]ASPRRPGLLAPE                            | TEAPE<br>KSPSRSPRRSASPRRP                                                          | 11 | S | PRKCD | SRSPRRSASPRRPG                        | 2.772  | 2.514  |
| Optineurin                                    | <i>Optn</i>   | S188 | LNSGGSSSEDS[+80]FVEI<br>R                                       | LNSGGSSSEDSFVEIRM<br>TEGE                                                          | 10 | S | PRKCA | SGGSSEDSFVEIRMT                       | 13.172 | 7.372  |
| Optineurin                                    | <i>Optn</i>   | S188 | LNSGGSSSEDS[+80]FVEI<br>R                                       | KLNSGGSSSEDSFVEIR<br>MTEGE                                                         | 11 | S | PRKCA | SGGSSEDSFVEIRMT                       | 13.172 | 7.372  |
| Optineurin                                    | <i>Optn</i>   | S188 | LNSGGSSSEDS[+80]FVEI<br>R                                       | LNSGGSSSEDSFVEIRM<br>TEGE                                                          | 10 | S | PRKCB | SGGSSEDSFVEIRMT                       | 16.017 | 10.858 |
| Optineurin                                    | <i>Optn</i>   | S188 | LNSGGSSSEDS[+80]FVEI<br>R                                       | KLNSGGSSSEDSFVEIR<br>MTEGE                                                         | 11 | S | PRKCB | SGGSSEDSFVEIRMT                       | 16.017 | 10.858 |
| Paxillin                                      | <i>Pxn</i>    | T313 | T[+80]GSSSPGGLSKP<br>GSQLDSMLGSLQSDLN<br>K                      | SDFKFMAQKGTGSSS<br>PPGGLS                                                          | 11 | T | PKCa  | KFMAQKGTGSSSP<br>G                    | 5.704  | 4.803  |
| Paxillin                                      | <i>Pxn</i>    | T313 | T[+80]GSSSPGGLSKP<br>GSQLDSMLGSLQSDLN<br>K                      | SDFKFMAQKGTGSSS<br>PPGGLS                                                          | 11 | T | PRKCA | KFMAQKGTGSSSP<br>G                    | 14.025 | 7.372  |
| Paxillin                                      | <i>Pxn</i>    | S320 | TGS[+80]SSPPGGLSKP<br>GSQLDSMLGSLQSDLN<br>K                     | FKFMAQKGTGSSSP<br>GGLSKP                                                           | 11 | S | PKCa  | MAQKGTGSSSPGG<br>L                    | 6.196  | 4.803  |



|                                                                |              |           |                                             |                             |    |   |       |                                   |        |        |
|----------------------------------------------------------------|--------------|-----------|---------------------------------------------|-----------------------------|----|---|-------|-----------------------------------|--------|--------|
| Paxillin                                                       | <i>Pxn</i>   | S320      | TGS[+80]SSPPGGLSKP<br>GSQLDSMLGSLQSDLN<br>K | GGFMAQGKTGSSSPP<br>GGLSKP   | 11 | S | PKCa  | MAQGKTGSSSPPGG<br>L               | 6.196  | 4.803  |
| Paxillin                                                       | <i>Pxn</i>   | S320      | TGS[+80]SSPPGGLSKP<br>GSQLDSMLGSLQSDLN<br>K | FKFMAQGKTGSSSPP<br>GGLSKP   | 11 | S | PKCd  | MAQGKTGSSSPPGG<br>L               | 3.973  | 3.771  |
| Paxillin                                                       | <i>Pxn</i>   | S320      | TGS[+80]SSPPGGLSKP<br>GSQLDSMLGSLQSDLN<br>K | GGFMAQGKTGSSSPP<br>GGLSKP   | 11 | S | PKCd  | MAQGKTGSSSPPGG<br>L               | 3.973  | 3.771  |
| Paxillin                                                       | <i>Pxn</i>   | S320      | TGS[+80]SSPPGGLSKP<br>GSQLDSMLGSLQSDLN<br>K | FKFMAQGKTGSSSPP<br>GGLSKP   | 11 | S | PRKCA | MAQGKTGSSSPPGG<br>L               | 18.01  | 7.372  |
| Paxillin                                                       | <i>Pxn</i>   | S320      | TGS[+80]SSPPGGLSKP<br>GSQLDSMLGSLQSDLN<br>K | GGFMAQGKTGSSSPP<br>GGLSKP   | 11 | S | PRKCA | MAQGKTGSSSPPGG<br>L               | 18.01  | 7.372  |
| Paxillin                                                       | <i>Pxn</i>   | S321      | TGSS[+80]SPPGGLSKP<br>GSQLDSMLGSLQSDLN<br>K | GFMAQGKTGSSSPPG<br>GLSKPG   | 11 | S | PRKCA | AQGKTGSSSPPGGLS                   | 12.46  | 7.372  |
| Paxillin                                                       | <i>Pxn</i>   | S321      | TGSS[+80]SPPGGLSKP<br>GSQLDSMLGSLQSDLN<br>K | KFMAQGKTGSSSPPG<br>GLSKPG   | 11 | S | PRKCA | AQGKTGSSSPPGGLS                   | 12.46  | 7.372  |
| Paxillin                                                       | <i>Pxn</i>   | S317      | TGSSS[+80]PPGGLSKP<br>GSQLDSMLGSLQSDLN<br>K | FMAQGKTGSSSPPGG<br>LSKPGS   | 11 | S | PRKCA | QGKTGSSSPPGGLSK                   | 11.303 | 7.372  |
| Paxillin                                                       | <i>Pxn</i>   | S328      | TGSSSPPGGLS[+80]KP<br>GSQLDSMLGSLQSDLN<br>K | TGSSSPPGGLSKPGSQ<br>LDSML   | 11 | S | PRKCA | SSPPGGLSKPGSQLD                   | 15.702 | 7.372  |
| Paxillin                                                       | <i>Pxn</i>   | S328      | TGSSSPPGGLS[+80]KP<br>GSQLDSMLGSLQSDLN<br>K | TGSSSPPGGLSKPGSQ<br>LDSM    | 11 | S | PRKCA | SSPPGGLSKPGSQLD                   | 17.045 | 7.372  |
| Paxillin                                                       | <i>Pxn</i>   | S327      | TGSSSPPGGLSKPGS[+8<br>0]QLDSMLGSLQSDLNK     | SPPGGLSKPGSQLDS<br>MLGSLQ   | 11 | S | PKCa  | GGLSKPGSQLDSML<br>G               | 5.378  | 4.803  |
| Paxillin                                                       | <i>Pxn</i>   | S327      | TGSSSPPGGLSKPGS[+8<br>0]QLDSMLGSLQSDLNK     | SPPGGLSKPGSQLDS<br>MLGSLQ   | 11 | S | PRKCA | GGLSKPGSQLDSML<br>G               | 17.682 | 7.372  |
| Phosphatidylinositol<br>3,4,5-trisphosphate<br>5-phosphatase 2 | <i>Inpp1</i> | S132      | DAS[+80]DVEDEKPLP<br>PR                     | EPDPPDRDASDVED<br>EKPLP     | 11 | S | PKC   | PPDDRASDVEDEK<br>P                | 3.065  | 1.416  |
| Phosphatidylinositol<br>3,4,5-trisphosphate<br>5-phosphatase 2 | <i>Inpp1</i> | S132      | DAS[+80]DVEDEKPLP<br>PR                     | EPDPPDRDASDVED<br>EKPLP     | 11 | S | PKCa  | PPDDRASDVEDEK<br>P                | 5.013  | 4.803  |
| Phosphatidylinositol<br>3,4,5-trisphosphate<br>5-phosphatase 2 | <i>Inpp1</i> | S132      | DAS[+80]DVEDEKPLP<br>PR                     | EPDPPDRDASDVED<br>EKPLP     | 11 | S | PRKCA | PPDDRASDVEDEK<br>P                | 10.035 | 7.372  |
| Plectin                                                        | <i>Plec</i>  | T462<br>6 | GYSPYSVSGSGST[+80<br>]AGSR                  | SPYSVSGSGSTAGSRT<br>GSR TG  | 11 | T | PRKCA | SVSGSGSTAGSRTGS                   | 11.04  | 7.372  |
| Plectin                                                        | <i>Plec</i>  | S438<br>8 | SS[+80]S[+80]VGSSSY<br>PISSAVPR             | GNAGGFRSRSSSVGSS<br>SSYPI   | 11 | S | PKC   | GGFRSRSSSVGSSSS                   | 1.924  | 1.416  |
| Plectin                                                        | <i>Plec</i>  | S438<br>8 | SS[+80]S[+80]VGSSSY<br>PISSAVPR             | NAGGFRSRSSSVGSSS<br>SYPIS   | 11 | S | PKC   | GFRSRSSSVGSSSSY                   | 2.988  | 1.416  |
| Plectin                                                        | <i>Plec</i>  | S438<br>8 | SS[+80]S[+80]VGSSSY<br>PISSAVPR             | GNAGGFRSRSSSVGSS<br>SSYPI   | 11 | S | PKCa  | GGFRSRSSSVGSSSS                   | 10.304 | 4.803  |
| Plectin                                                        | <i>Plec</i>  | S438<br>8 | SS[+80]S[+80]VGSSSY<br>PISSAVPR             | NAGGFRSRSSSVGSSS<br>SYPIS   | 11 | S | PKCa  | GFRSRSSSVGSSSSY                   | 10.443 | 4.803  |
| Plectin                                                        | <i>Plec</i>  | S438<br>8 | SS[+80]S[+80]VGSSSY<br>PISSAVPR             | GNAGGFRSRSSSVGSS<br>SSYPI   | 11 | S | PRKCA | GGFRSRSSSVGSSSS                   | 16.556 | 7.372  |
| Plectin                                                        | <i>Plec</i>  | S438<br>8 | SS[+80]S[+80]VGSSSY<br>PISSAVPR             | NAGGFRSRSSSVGSSS<br>SYPIS   | 11 | S | PRKCA | GFRSRSSSVGSSSSY                   | 20.313 | 7.372  |
| Plectin                                                        | <i>Plec</i>  | S438<br>8 | SS[+80]S[+80]VGSSSY<br>PISSAVPR             | GNAGGFRSRSSSVGSS<br>SSYPI   | 11 | S | PRKCB | GFRSRSSSVGSSSSY                   | 12.224 | 10.858 |
| Plectin                                                        | <i>Plec</i>  | S438<br>8 | SS[+80]S[+80]VGSSSY<br>PISSAVPR             | GNAGGFRSRSSSVGSS<br>SSYPI   | 11 | S | PRKCD | GGFRSRSSSVGSSSS                   | 3.333  | 2.514  |
| Plectin                                                        | <i>Plec</i>  | S438<br>8 | SS[+80]S[+80]VGSSSY<br>PISSAVPR             | NAGGFRSRSSSVGSSS<br>SYPIS   | 11 | S | PRKCD | GFRSRSSSVGSSSSY                   | 3.211  | 2.514  |
| Plectin                                                        | <i>Plec</i>  | S440<br>9 | TQLAS[+80]WSDPTEET<br>GPVAGILDTETLEK        | SSAVPRTQLASWSDPT<br>EETGP   | 11 | S | PRKCA | VPRTQLASWSDPTEE<br>RTQLASWSDPTEET | 12.187 | 7.372  |
| Plectin                                                        | <i>Plec</i>  | S441<br>1 | TQLASWS[+80]DPTEET<br>GPVAGILDTETLEK        | AVPRTQLASWSDPTEE<br>TGPVA   | 11 | S | PRKCA | G                                 | 7.783  | 7.372  |
| Plectin                                                        | <i>Plec</i>  | T441<br>4 | TQLASWSDPT[+80]EET<br>GPVAGILDTETLEK        | RTQLASWSDPTEETGP<br>VAGIL   | 11 | T | PRKCA | LASWSDPTEETGPVA                   | 8      | 7.372  |
| Plectin                                                        | <i>Plec</i>  | S462<br>9 | GYSPYSVSGSGSTAGS[<br>+80]R                  | SVSGSGSTAGSRTGSR<br>TGSRA   | 11 | S | PKC   | GSGSTAGSRTGSR TG                  | 2.896  | 1.416  |
| Plectin                                                        | <i>Plec</i>  | S462<br>9 | GYSPYSVSGSGSTAGS[<br>+80]R                  | YSVSGSGSTAGSRTGS<br>RTGSRAG | 12 | S | PKC   | GSGSTAGSRTGSR TG                  | 2.648  | 1.416  |

|                                                   |                  |           |                                             |                              |    |   |       |                      |        |        |
|---------------------------------------------------|------------------|-----------|---------------------------------------------|------------------------------|----|---|-------|----------------------|--------|--------|
| Plectin                                           | <i>Plec</i>      | S462<br>9 | GYSPYVSVSGSGSTAGS[+80]R                     | SVSGSGSTAGSRTGSR<br>TGSRA    | 11 | S | PKCa  | GSGSTAGSRTGSR        | 9.783  | 4.803  |
| Plectin                                           | <i>Plec</i>      | S462<br>9 | GYSPYVSVSGSGSTAGS[+80]R                     | YVSVSGSGSTAGSRTGS<br>RTGSRAG | 12 | S | PKCa  | GSGSTAGSRTGSR        | 9.239  | 4.803  |
| Plectin                                           | <i>Plec</i>      | S462<br>9 | GYSPYVSVSGSGSTAGS[+80]R                     | SVSGSGSTAGSRTGSR<br>TGSRA    | 11 | S | PRKCA | GSGSTAGSRTGSR        | 18.323 | 7.372  |
| Plectin                                           | <i>Plec</i>      | S462<br>9 | GYSPYVSVSGSGSTAGS[+80]R                     | YVSVSGSGSTAGSRTGS<br>RTGSRAG | 12 | S | PRKCA | GSGSTAGSRTGSR        | 16.394 | 7.372  |
| Plectin                                           | <i>Plec</i>      | S462<br>9 | GYSPYVSVSGSGSTAGS[+80]R                     | SVSGSGSTAGSRTGSR<br>TGSRA    | 11 | S | PRKCB | GSGSTAGSRTGSR        | 11.966 | 10.858 |
| Plectin                                           | <i>Plec</i>      | S462<br>9 | GYSPYVSVSGSGSTAGS[+80]R                     | YVSVSGSGSTAGSRTGS<br>RTGSRAG | 12 | S | PRKCB | GSGSTAGSRTGSR        | 11.793 | 10.858 |
| Protein enabled homolog                           | <i>Enah</i>      | S354      | NSRPS[+80]SPVNT PSS<br>QPPAAK               | PRPLNKNSRPSSPVNT<br>PSSQP    | 11 | S | PKC   | LNKNSRPSSPVNTPS      | 1.911  | 1.416  |
| Protein enabled homolog                           | <i>Enah</i>      | S354      | NSRPS[+80]SPVNT PSS<br>QPPAAK               | PRPLNKNSRPSSPVNT<br>PSSQP    | 11 | S | PKCa  | LNKNSRPSSPVNTPS      | 8.739  | 4.803  |
| Protein enabled homolog                           | <i>Enah</i>      | S354      | NSRPS[+80]SPVNT PSS<br>QPPAAK               | PRPLNKNSRPSSPVNT<br>PSSQP    | 11 | S | PRKCA | LNKNSRPSSPVNTPS      | 14.894 | 7.372  |
| Protein enabled homolog                           | <i>Enah</i>      | S354      | NSRPS[+80]SPVNT PSS<br>QPPAAK               | PRPLNKNSRPSSPVNT<br>PSSQP    | 11 | S | PRKCB | LNKNSRPSSPVNTPS      | 11.931 | 10.858 |
| Protein enabled homolog                           | <i>Enah</i>      | S355      | NSRPSS[+80]PVNT PSS<br>QPPAAK               | RPLNKNSRPSSPVNT<br>SSQPP     | 11 | S | PKC   | NKNSRPSSPVNT PSS     | 1.512  | 1.416  |
| Protein enabled homolog                           | <i>Enah</i>      | S355      | NSRPSS[+80]PVNT PSS<br>QPPAAK               | RPLNKNSRPSSPVNT<br>SSQPP     | 11 | S | PKCa  | NKNSRPSSPVNT PSS     | 7.674  | 4.803  |
| Protein enabled homolog                           | <i>Enah</i>      | S355      | NSRPSS[+80]PVNT PSS<br>QPPAAK               | RPLNKNSRPSSPVNT<br>SSQPP     | 11 | S | PRKCA | NKNSRPSSPVNT PSS     | 15.096 | 7.372  |
| Protein furry homolog                             | <i>Fry</i>       | S193<br>6 | NSDLFTVLS[+80]R                             | LKNSD<br>LFTVLSRSSSPDLSS     | 11 | S | PKCa  | SDLFTVLSRSSSPDL      | 6.209  | 4.803  |
| Protein furry homolog                             | <i>Fry</i>       | S193<br>6 | NSDLFTVLS[+80]R                             | LKNSD<br>LFTVLSRSSSPDLSS     | 11 | S | PRKCA | SDLFTVLSRSSSPDL      | 13.303 | 7.372  |
| Protein phosphatase 1 regulatory subunit 12A      | <i>Ppp1r1 2a</i> | S873      | STGVSFWTQDS DENEQ<br>ERQS[+80]DTE DGSKR     | DSDENEQERQSDTE D<br>GSSKRD   | 11 | S | PKC   | ENEQERQSDTE DGS<br>S | 3.119  | 1.416  |
| Protein phosphatase 1 regulatory subunit 12A      | <i>Ppp1r1 2a</i> | S873      | STGVSFWTQDS DENEQ<br>ERQS[+80]DTE DGSKR     | DSDENEQERQSDTE D<br>GSSKRD   | 11 | S | PKCa  | ENEQERQSDTE DGS<br>S | 7.439  | 4.803  |
| Protein phosphatase 1 regulatory subunit 12A      | <i>Ppp1r1 2a</i> | S873      | STGVSFWTQDS DENEQ<br>ERQS[+80]DTE DGSKR     | DSDENEQERQSDTE D<br>GSSKRD   | 11 | S | PRKCA | ENEQERQSDTE DGS<br>S | 13.788 | 7.372  |
| Protein phosphatase 1 regulatory subunit 12A      | <i>Ppp1r1 2a</i> | S873      | STGVSFWTQDS DENEQ<br>ERQS[+80]DTE DGSKR     | DSDENEQERQSDTE D<br>GSSKRD   | 11 | S | PRKCB | ENEQERQSDTE DGS<br>S | 11.621 | 10.858 |
| Rho GTPase-activating protein 35                  | <i>Arhgap 35</i> | S117<br>9 | TFSVGS[+80]DDEL GPI<br>R                    | ASYRTSFSVGS DDELG<br>PIRKK   | 11 | S | PRKCA | RTSFSVGS DDELGPI     | 12.359 | 7.372  |
| Septin-7                                          | <i>Sept7</i>     | T425      | ILEQQNSSRT[+80]LEK                          | RILEQQNSSRTLEKNKK<br>KGKI    | 11 | T | PKC   | EQQNSSRTLEKNKKK      | 3.024  | 1.416  |
| Septin-7                                          | <i>Sept7</i>     | T425      | ILEQQNSSRT[+80]LEK                          | RILEQQNSSRTLEKNKK<br>KGKI    | 11 | T | PKCa  | EQQNSSRTLEKNKKK      | 12.378 | 4.803  |
| Septin-7                                          | <i>Sept7</i>     | T425      | ILEQQNSSRT[+80]LEK                          | RILEQQNSSRTLEKNKK<br>KGKI    | 11 | T | PRKCA | EQQNSSRTLEKNKKK      | 18.904 | 7.372  |
| Septin-7                                          | <i>Sept7</i>     | T425      | ILEQQNSSRT[+80]LEK                          | RILEQQNSSRTLEKNKK<br>KGKI    | 11 | T | PRKCB | EQQNSSRTLEKNKKK      | 13.672 | 10.858 |
| SH3 and multiple ankyrin repeat domains protein 3 | <i>Shank3</i>    | T123<br>5 | LGAEERPGT[+80]PEL<br>APTPMQAAVAE PMP<br>SPR | RLGAEERPGTPELAP<br>TPMQA     | 11 | T | PRKCA | AEERPGTPELAPT        | 9.288  | 7.372  |
| SH3 domain-binding protein 1                      | <i>Sh3bp1</i>    | S539      | ERTESELPKPAS[+80]PK                         | RTESELPKPASPKVSR<br>SPTDT    | 11 | S | PKC   | SELPKPASPKVSRSP      | 4.591  | 1.416  |
| SH3 domain-binding protein 1                      | <i>Sh3bp1</i>    | S539      | ERTESELPKPAS[+80]PK                         | RTESELPKPASPKVSR<br>SPTDT    | 11 | S | PKCa  | SELPKPASPKVSRSP      | 10.204 | 4.803  |
| SH3 domain-binding protein 1                      | <i>Sh3bp1</i>    | S539      | ERTESELPKPAS[+80]PK                         | RTESELPKPASPKVSR<br>SPTDT    | 11 | S | PKCd  | SELPKPASPKVSRSP      | 4.014  | 3.771  |
| SH3 domain-binding protein 1                      | <i>Sh3bp1</i>    | S539      | ERTESELPKPAS[+80]PK                         | RTESELPKPASPKVSR<br>SPTDT    | 11 | S | PRKCA | SELPKPASPKVSRSP      | 18.864 | 7.372  |
| Shroom family member 3                            | <i>Shroom 3</i>  | S763      | RLS[+80]ASSTPALQYK                          | QTSGMSQRRLSASSTP<br>ALQYK    | 11 | S | PKC   | GMSQRRLSASSTPAL      | 3.809  | 1.416  |
| Shroom family member 3                            | <i>Shroom 3</i>  | S763      | RLS[+80]ASSTPALQYK                          | QTSGMSQRRLSASSTP<br>ALQYK    | 11 | S | PKCa  | GMSQRRLSASSTPAL      | 12.313 | 4.803  |

|                                                      |                |      |                               |                         |    |   |       |                  |        |       |
|------------------------------------------------------|----------------|------|-------------------------------|-------------------------|----|---|-------|------------------|--------|-------|
| Shroom family member 3                               | <i>Shroom3</i> | S763 | RLS[+80]ASSTPALQYK            | QTSGMSQRRLSASSTPALQYK   | 11 | S | PKCd  | GMSQRRLSASSTPAL  | 4.216  | 3.771 |
| Shroom family member 3                               | <i>Shroom3</i> | S763 | RLS[+80]ASSTPALQYK            | QTSGMSQRRLSASSTPALQYK   | 11 | S | PRKCA | GMSQRRLSASSTPAL  | 16.727 | 7.372 |
| Shroom family member 3                               | <i>Shroom3</i> | S763 | RLS[+80]ASSTPALQYK            | QTSGMSQRRLSASSTPALQYK   | 11 | S | PRKCD | GMSQRRLSASSTPAL  | 3.526  | 2.514 |
| Sorbin and SH3 domain-containing protein 1           | <i>Sorbs1</i>  | S345 | DIS[+80]PEEIDLK               | TNEKMSRDISPEEIDLKNEP    | 10 | S | PRKCA | EKMSRDISPEEIDLK  | 12.934 | 7.372 |
| Sorbin and SH3 domain-containing protein 1           | <i>Sorbs1</i>  | S345 | DIS[+80]PEEIDLK               | LTNEKMSRDISPEEIDLKNEP   | 11 | S | PRKCA | EKMSRDISPEEIDLK  | 12.934 | 7.372 |
| Sorbin and SH3 domain-containing protein 1           | <i>Sorbs1</i>  | S401 | ES[+80]DGTPGGLASLENER         | SSDFHAVKRES DGTPGGLASL  | 11 | S | PKC   | FHAVKRES DGTPGGL | 2.317  | 1.416 |
| Sorbin and SH3 domain-containing protein 1           | <i>Sorbs1</i>  | S401 | ES[+80]DGTPGGLASLENER         | SSDFHAVKRES DGTPGGLASL  | 11 | S | PKCa  | FHAVKRES DGTPGGL | 5.687  | 4.803 |
| Sorbin and SH3 domain-containing protein 1           | <i>Sorbs1</i>  | S401 | ES[+80]DGTPGGLASLENER         | SSDFHAVKRES DGTPGGLASL  | 11 | S | PKCd  | FHAVKRES DGTPGGL | 4      | 3.771 |
| Sorbin and SH3 domain-containing protein 1           | <i>Sorbs1</i>  | S401 | ES[+80]DGTPGGLASLENER         | SSDFHAVKRES DGTPGGLASL  | 11 | S | PRKCA | FHAVKRES DGTPGGL | 13.742 | 7.372 |
| Sorbin and SH3 domain-containing protein 1           | <i>Sorbs1</i>  | T404 | ESDGT[+80]PGGLASLENER         | FHAVKRES DGTPGGLASLENE  | 11 | T | PRKCA | VKRES DGTPGGLASL | 9.116  | 7.372 |
| Sorbin and SH3 domain-containing protein 1           | <i>Sorbs1</i>  | S92  | ETPSSSPVSPQES[+80]PKHENK      | PSSSPVSPQESPKHENKSDWEW  | 11 | S | PKC   | SPVSPQESPKHENKS  | 2.871  | 1.416 |
| Sorbin and SH3 domain-containing protein 1           | <i>Sorbs1</i>  | S92  | ETPSSSPVSPQES[+80]PKHENK      | PSSSPVSPQESPKHENKSDWEW  | 11 | S | PKCa  | SPVSPQESPKHENKS  | 10.548 | 4.803 |
| Sorbin and SH3 domain-containing protein 1           | <i>Sorbs1</i>  | S92  | ETPSSSPVSPQES[+80]PKHENK      | PSSSPVSPQESPKHENKSDWEW  | 11 | S | PRKCA | SPVSPQESPKHENKS  | 14.636 | 7.372 |
| Sorbin and SH3 domain-containing protein 1 Isoform 2 | <i>Sorbs1</i>  | S164 | LSSLS[+80]DPASER              | EQQKRLSSSLDPASER RAGE   | 10 | S | PKC   | QKRLSSSLDPASERR  | 1.965  | 1.416 |
| Sorbin and SH3 domain-containing protein 1 Isoform 2 | <i>Sorbs1</i>  | S164 | LSSLS[+80]DPASER              | REQQKRLSSSLDPASER RRVGE | 11 | S | PKC   | QKRLSSSLDPASERR  | 1.881  | 1.416 |
| Sorbin and SH3 domain-containing protein 1 Isoform 2 | <i>Sorbs1</i>  | S164 | LSSLS[+80]DPASER              | EQQKRLSSSLDPASER RAGE   | 10 | S | PKCa  | QKRLSSSLDPASERR  | 6.326  | 4.803 |
| Sorbin and SH3 domain-containing protein 1 Isoform 2 | <i>Sorbs1</i>  | S164 | LSSLS[+80]DPASER              | REQQKRLSSSLDPASER RRVGE | 11 | S | PKCa  | QKRLSSSLDPASERR  | 6.396  | 4.803 |
| Sorbin and SH3 domain-containing protein 1 Isoform 2 | <i>Sorbs1</i>  | S164 | LSSLS[+80]DPASER              | EQQKRLSSSLDPASER RAGE   | 10 | S | PRKCA | QKRLSSSLDPASERR  | 8.924  | 7.372 |
| Sorbin and SH3 domain-containing protein 1 Isoform 2 | <i>Sorbs1</i>  | S164 | LSSLS[+80]DPASER              | REQQKRLSSSLDPASER RRVGE | 11 | S | PRKCA | QKRLSSSLDPASERR  | 8.611  | 7.372 |
| Sorbin and SH3 domain-containing protein 2           | <i>Sorbs2</i>  | S394 | ADLPGSSSTFTTSFISSS[+80]PSSPSR | STFTTSFISSSPSSPSRAQGG   | 11 | S | PKCa  | TTSFISSSPSSPSRA  | 6.291  | 4.803 |
| Sorbin and SH3 domain-containing protein 2           | <i>Sorbs2</i>  | S394 | ADLPGSSSTFTTSFISSS[+80]PSSPSR | STFTTSFISSSPSSPSRAQGG   | 11 | S | PKCa  | TTSFISSSPSSPSRA  | 6.809  | 4.803 |
| Sorbin and SH3 domain-containing protein 2           | <i>Sorbs2</i>  | S394 | ADLPGSSSTFTTSFISSS[+80]PSSPSR | STFTTSFISSSPSSPSRAQGG   | 11 | S | PRKCA | TTSFISSSPSSPSRA  | 10.187 | 7.372 |
| Sorbin and SH3 domain-containing protein 2           | <i>Sorbs2</i>  | S394 | ADLPGSSSTFTTSFISSS[+80]PSSPSR | STFTTSFISSSPSSPSRAQGG   | 11 | S | PRKCA | TTSFISSSPSSPSRA  | 9.672  | 7.372 |
| Sorbin and SH3 domain-containing protein 2           | <i>Sorbs2</i>  | S396 | ADLPGSSSTFTTSFISSSP[+80]SPSR  | FTTSFISSSPSSPSRAQGGDD   | 11 | S | PKCa  | SFISSSPSSPSRAQGG | 10.996 | 4.803 |
| Sorbin and SH3 domain-containing protein 2           | <i>Sorbs2</i>  | S396 | ADLPGSSSTFTTSFISSSP[+80]SPSR  | FTTSFISSSPSSPSRAQGGDD   | 11 | S | PRKCA | SFISSSPSSPSRAQGG | 14.758 | 7.372 |

|                                            |               |       |                                   |                        |    |   |       |                  |        |        |
|--------------------------------------------|---------------|-------|-----------------------------------|------------------------|----|---|-------|------------------|--------|--------|
| Sorbin and SH3 domain-containing protein 2 | <i>Sorbs2</i> | S396  | ADLPGSSSTFTTSFISSP S[+80]SPSR     | FTTSFISSSPSSPRAQ GGDD  | 11 | S | PRKCB | SFISSSPSSPRAQG   | 12.31  | 10.858 |
| Sorbin and SH3 domain-containing protein 2 | <i>Sorbs2</i> | S266  | EAPS[+80]PVPPPHVPP RPR            | NGTDAFKEAPSPVPPP HVPPR | 11 | S | PRKCA | DAFKEAPSPVPPPHV  | 11.965 | 7.372  |
| Sorbin and SH3 domain-containing protein 2 | <i>Sorbs2</i> | S38   | ES[+80]HSPDSAQR                   | SPNLLAAGRESHSPDS AWRSY | 11 | S | PKCa  | LLAAGRESHSPDSA W | 6.713  | 4.803  |
| Sorbin and SH3 domain-containing protein 2 | <i>Sorbs2</i> | S38   | ES[+80]HSPDSAQR                   | SPNLLAAGRESHSPDS AWRSY | 11 | S | PRKCA | LLAAGRESHSPDSA W | 12.621 | 7.372  |
| Sorbin and SH3 domain-containing protein 2 | <i>Sorbs2</i> | S38   | ES[+80]HSPDSAQR                   | SPNLLAAGRESHSPDS AWRSY | 11 | S | PRKCB | LLAAGRESHSPDSA W | 11.724 | 10.858 |
| Sorbin and SH3 domain-containing protein 2 | <i>Sorbs2</i> | S40   | ESHS[+80]PDSAQR                   | NLLAAGRESHSPDSA WRSYNG | 11 | S | PRKCA | AAGRESHSPDSAQR S | 11.606 | 7.372  |
| Sorbin and SH3 domain-containing protein 2 | <i>Sorbs2</i> | S1111 | GSEDYDPPLPHS[+80] YSSDR           | EDYDPPLPHSYSSDR IYSL   | 11 | S | PRKCA | PDPPLPHSYSSDR IY | 12.273 | 7.372  |
| Sorbin and SH3 domain-containing protein 2 | <i>Sorbs2</i> | S1113 | GSEDYDPPLPHSYS[+80]SDR            | YDPPLPHSYSSDR IYSLSSN  | 11 | S | PKCa  | PPLPHSYSSDR IYSL | 6.178  | 4.803  |
| Sorbin and SH3 domain-containing protein 2 | <i>Sorbs2</i> | S1113 | GSEDYDPPLPHSYS[+80]SDR            | YDPPLPHSYSSDR IYSLSSN  | 11 | S | PRKCA | PPLPHSYSSDR IYSL | 15.556 | 7.372  |
| Sorbin and SH3 domain-containing protein 2 | <i>Sorbs2</i> | S1113 | GSEDYDPPLPHSYS[+80]SDR            | YDPPLPHSYSSDR IYSLSSN  | 11 | S | PRKCB | PPLPHSYSSDR IYSL | 14.5   | 10.858 |
| Sorbin and SH3 domain-containing protein 2 | <i>Sorbs2</i> | S1114 | GSEDYDPPLPHSYS[+80]DR             | PDPPLPHSYSSDR IYSLSSNK | 11 | S | PKC   | PLPHSYSSDR IYSL  | 1.885  | 1.416  |
| Sorbin and SH3 domain-containing protein 2 | <i>Sorbs2</i> | S1114 | GSEDYDPPLPHSYS[+80]DR             | PDPPLPHSYSSDR IYSLSSNK | 11 | S | PRKCA | PLPHSYSSDR IYSL  | 16.419 | 7.372  |
| Sorbin and SH3 domain-containing protein 2 | <i>Sorbs2</i> | S354  | KS[+80]EPAVGPPR                   | MAGDFRKRKSEPAV GPPRGL  | 11 | S | PKC   | DFRKRKSEPAVGPP   | 3.853  | 1.416  |
| Sorbin and SH3 domain-containing protein 2 | <i>Sorbs2</i> | S354  | KS[+80]EPAVGPPR                   | MAGDFRKRKSEPAV GPPRGL  | 11 | S | PKCa  | DFRKRKSEPAVGPP   | 11.078 | 4.803  |
| Sorbin and SH3 domain-containing protein 2 | <i>Sorbs2</i> | S354  | KS[+80]EPAVGPPR                   | MAGDFRKRKSEPAV GPPRGL  | 11 | S | PKCd  | DFRKRKSEPAVGPP   | 5.014  | 3.771  |
| Sorbin and SH3 domain-containing protein 2 | <i>Sorbs2</i> | S354  | KS[+80]EPAVGPPR                   | MAGDFRKRKSEPAV GPPRGL  | 11 | S | PRKCA | DFRKRKSEPAVGPP   | 17.914 | 7.372  |
| Sorbin and SH3 domain-containing protein 2 | <i>Sorbs2</i> | S354  | KS[+80]EPAVGPPR                   | MAGDFRKRKSEPAV GPPRGL  | 11 | S | PRKCB | DFRKRKSEPAVGPP   | 13.69  | 10.858 |
| Sorbin and SH3 domain-containing protein 2 | <i>Sorbs2</i> | S354  | KS[+80]EPAVGPPR                   | MAGDFRKRKSEPAV GPPRGL  | 11 | S | PRKCD | DFRKRKSEPAVGPP   | 3.158  | 2.514  |
| Sorbin and SH3 domain-containing protein 2 | <i>Sorbs2</i> | S130  | S[+80]LDSAETYSQHAQ SLDGTMGSSIPLYR | NSSIIMPHGRSLDSAET YSQH | 11 | S | PRKCA | IIMPHGRSLDSAET Y | 16.086 | 7.372  |
| Sorbin and SH3 domain-containing protein 2 | <i>Sorbs2</i> | S130  | S[+80]LDSAETYSQHAQ SLDGTMGSSIPLYR | NSSIIMQHGRSLDSAE TYSQH | 11 | S | PRKCA | IIMQHGRSLDSAET Y | 16.086 | 7.372  |
| Sorbin and SH3 domain-containing protein 2 | <i>Sorbs2</i> | S334  | S[+80]LERPSSASMAG DFR             | VSVYQSSIDRSLERPSS SASM | 11 | S | PKCa  | YQSSIDRSLERPSS   | 6.883  | 4.803  |
| Sorbin and SH3 domain-containing protein 2 | <i>Sorbs2</i> | S334  | S[+80]LERPSSASMAG DFR             | VSIYQSSIDRSLERPSS ASM  | 11 | S | PKCa  | YQSSIDRSLERPSS   | 6.883  | 4.803  |
| Sorbin and SH3 domain-containing protein 2 | <i>Sorbs2</i> | S334  | S[+80]LERPSSASMAG DFR             | VSVYQSSIDRSLERPSS SASM | 11 | S | PRKCA | YQSSIDRSLERPSS   | 20.934 | 7.372  |
| Sorbin and SH3 domain-containing protein 2 | <i>Sorbs2</i> | S334  | S[+80]LERPSSASMAG DFR             | VSIYQSSIDRSLERPSS ASM  | 11 | S | PRKCA | YQSSIDRSLERPSS   | 20.934 | 7.372  |

|                                            |               |      |                                   |                        |    |   |       |                  |        |        |
|--------------------------------------------|---------------|------|-----------------------------------|------------------------|----|---|-------|------------------|--------|--------|
| Sorbin and SH3 domain-containing protein 2 | <i>Sorbs2</i> | S334 | S[+80]LERPSSASMAG DFR             | VSVYQSSIDRSLERPSS SASM | 11 | S | PRKCB | YQSSIDRSLERPSSS  | 14.621 | 10.858 |
| Sorbin and SH3 domain-containing protein 2 | <i>Sorbs2</i> | S334 | S[+80]LERPSSASMAG DFR             | VSIYQSSIDRSLERPSSS ASM | 11 | S | PRKCB | YQSSIDRSLERPSSS  | 14.621 | 10.858 |
| Sorbin and SH3 domain-containing protein 2 | <i>Sorbs2</i> | S133 | SLDS[+80]AETYSQHAQ SLDGTMGSSIPLYR | IIMPHGRSLDSAETYS QHAQS | 11 | S | PRKCA | PHGRSLDSAETYSQH  | 10.833 | 7.372  |
| Sorbin and SH3 domain-containing protein 2 | <i>Sorbs2</i> | S133 | SLDS[+80]AETYSQHAQ SLDGTMGSSIPLYR | IIMQHGRSLDSAETYS QHAQS | 11 | S | PRKCA | QHGRSLDSAETYSQ H | 10.833 | 7.372  |
| Sorbin and SH3 domain-containing protein 2 | <i>Sorbs2</i> | T136 | SLDSAET[+80]YSQHAQ SLDGTMGSSIPLYR | PHGRSLDSAETYSQHA QSLDG | 11 | T | PKCa  | RSLDSAETYSQHAQS  | 5.596  | 4.803  |
| Sorbin and SH3 domain-containing protein 2 | <i>Sorbs2</i> | T136 | SLDSAET[+80]YSQHAQ SLDGTMGSSIPLYR | QHGRSLDSAETYSQH AQSLDG | 11 | T | PKCa  | RSLDSAETYSQHAQS  | 5.596  | 4.803  |
| Sorbin and SH3 domain-containing protein 2 | <i>Sorbs2</i> | T136 | SLDSAET[+80]YSQHAQ SLDGTMGSSIPLYR | PHGRSLDSAETYSQHA QSLDG | 11 | T | PRKCA | RSLDSAETYSQHAQS  | 9.449  | 7.372  |
| Sorbin and SH3 domain-containing protein 2 | <i>Sorbs2</i> | T136 | SLDSAET[+80]YSQHAQ SLDGTMGSSIPLYR | QHGRSLDSAETYSQH AQSLDG | 11 | T | PRKCA | RSLDSAETYSQHAQS  | 9.449  | 7.372  |
| Sorbin and SH3 domain-containing protein 2 | <i>Sorbs2</i> | S138 | SLDSAETYS[+80]QHAQ SLDGTMGSSIPLYR | GRSLDSAETYSQHAQS LDGTM | 11 | S | PRKCA | LDSAETYSQHAQSLD  | 11.914 | 7.372  |
| Sorbin and SH3 domain-containing protein 2 | <i>Sorbs2</i> | S143 | SLDSAETYSQHAQS[+80]LDGTMGSSIPLYR  | SAETYSQHAQSLDGT MGSSIP | 11 | S | PKC   | TYSQHAQSLDGTMG S | 1.662  | 1.416  |
| Sorbin and SH3 domain-containing protein 2 | <i>Sorbs2</i> | S143 | SLDSAETYSQHAQS[+80]LDGTMGSSIPLYR  | SAETYSQHAQSLDGT MGSSIP | 11 | S | PRKCA | TYSQHAQSLDGTMG S | 14.96  | 7.372  |
| Sorbin and SH3 domain-containing protein 2 | <i>Sorbs2</i> | T147 | SLDSAETYSQHAQSLDG T[+80]MGSSIPLYR | YSQHAQSLDGTMGSSI PLYRS | 11 | T | PRKCA | HAQSLDGTMGSSIPL  | 13.551 | 7.372  |
| Sorbin and SH3 domain-containing protein 2 | <i>Sorbs2</i> | S324 | SLERP[+80]SSASMAG DFR             | SSIDRSLERPSSSASMA GDF  | 11 | S | PKC   | DRSLERPSSSASMAG  | 1.694  | 1.416  |
| Sorbin and SH3 domain-containing protein 2 | <i>Sorbs2</i> | S324 | SLERP[+80]SSASMAG DFR             | SSIDRSLERPSSSASMA GDF  | 11 | S | PKCa  | DRSLERPSSSASMAG  | 9.409  | 4.803  |
| Sorbin and SH3 domain-containing protein 2 | <i>Sorbs2</i> | S324 | SLERP[+80]SSASMAG DFR             | SSIDRSLERPSSSASMA GDF  | 11 | S | PRKCA | DRSLERPSSSASMAG  | 17.985 | 7.372  |
| Sorbin and SH3 domain-containing protein 2 | <i>Sorbs2</i> | S324 | SLERP[+80]SSASMAG DFR             | SSIDRSLERPSSSASMA GDF  | 11 | S | PRKCB | DRSLERPSSSASMAG  | 11.879 | 10.858 |
| Sorbin and SH3 domain-containing protein 2 | <i>Sorbs2</i> | S324 | SLERP[+80]SSASMAG DFR             | SSIDRSLERPSSSASMA GDF  | 11 | S | PRKCD | DRSLERPSSSASMAG  | 2.86   | 2.514  |
| Sorbin and SH3 domain-containing protein 2 | <i>Sorbs2</i> | S340 | SLERPSS[+80]SAS[+80]MAGDFR        | SIDRSLERPSSSASMA GDFRK | 11 | S | PKC   | RSLERPSSSASMAGD  | 3.525  | 1.416  |
| Sorbin and SH3 domain-containing protein 2 | <i>Sorbs2</i> | S340 | SLERPSS[+80]SAS[+80]MAGDFR        | SIDRSLERPSSSASMA GDFRK | 11 | S | PKCa  | RSLERPSSSASMAGD  | 7.883  | 4.803  |
| Sorbin and SH3 domain-containing protein 2 | <i>Sorbs2</i> | S340 | SLERPSS[+80]SAS[+80]MAGDFR        | SIDRSLERPSSSASMA GDFRK | 11 | S | PRKCA | RSLERPSSSASMAGD  | 17.227 | 7.372  |
| Sorbin and SH3 domain-containing protein 2 | <i>Sorbs2</i> | S340 | SLERPSS[+80]SAS[+80]MAGDFR        | SIDRSLERPSSSASMA GDFRK | 11 | S | PRKCD | RSLERPSSSASMAGD  | 2.737  | 2.514  |
| Sorbin and SH3 domain-containing protein 2 | <i>Sorbs2</i> | S341 | SLERPSSS[+80]ASMAG DFR            | IDRSLERPSSSASMAG DFRKR | 11 | S | PKC   | SLERPSSSASMAGDF  | 2.294  | 1.416  |
| Sorbin and SH3 domain-containing protein 2 | <i>Sorbs2</i> | S341 | SLERPSSS[+80]ASMAG DFR            | IDRSLERPSSSASMAG DFRKR | 11 | S | PRKCA | SLERPSSSASMAGDF  | 16.101 | 7.372  |
| Sorbin and SH3 domain-containing protein 2 | <i>Sorbs2</i> | S341 | SLERPSSS[+80]ASMAG DFR            | IDRSLERPSSSASMAG DFRKR | 11 | S | PRKCB | SLERPSSSASMAGDF  | 16.379 | 10.858 |

|                                            |               |       |                                   |                          |    |   |       |                |        |       |
|--------------------------------------------|---------------|-------|-----------------------------------|--------------------------|----|---|-------|----------------|--------|-------|
| Sorbin and SH3 domain-containing protein 2 | <i>Sorbs2</i> | S343  | SLERPSSAS[+80]MAGDFRK             | RSLERPSSASMAGDFRKRK      | 11 | S | PKC   | ERPSSASMAGDFRK | 2.774  | 1.416 |
| Sorbin and SH3 domain-containing protein 2 | <i>Sorbs2</i> | S343  | SLERPSSAS[+80]MAGDFRK             | RSLERPSSASMAGDFRKRK      | 11 | S | PKCa  | ERPSSASMAGDFRK | 7.648  | 4.803 |
| Sorbin and SH3 domain-containing protein 2 | <i>Sorbs2</i> | S343  | SLERPSSAS[+80]MAGDFRK             | RSLERPSSASMAGDFRKRK      | 11 | S | PRKCA | ERPSSASMAGDFRK | 18.773 | 7.372 |
| Sorbin and SH3 domain-containing protein 2 | <i>Sorbs2</i> | S355  | SPS[+80]PPPR                      | SPSTDGLRSPPPRSCVPAP      | 11 | S | PKCa  | TDGLRSPPPRSCV  | 7.004  | 4.803 |
| Sorbin and SH3 domain-containing protein 2 | <i>Sorbs2</i> | S355  | SPS[+80]PPPR                      | SPSTDGLRSPPPRSCVPAP      | 11 | S | PRKCA | TDGLRSPPPRSCV  | 15.919 | 7.372 |
| Sorbin and SH3 domain-containing protein 2 | <i>Sorbs2</i> | S397  | TSPGRADLPGSSSTFTTSSISSPSS[+80]PSR | TTSFISSPSSPSRAQGGDS      | 11 | S | PKC   | SSSPSSPSRAQGGD | 1.629  | 1.416 |
| Sorbin and SH3 domain-containing protein 2 | <i>Sorbs2</i> | S397  | TSPGRADLPGSSSTFTTSSISSPSS[+80]PSR | TTSFISSPSSPSRAQGGDS      | 11 | S | PKCa  | FISSPSSPSRAQGG | 6.2    | 4.803 |
| Sorbin and SH3 domain-containing protein 2 | <i>Sorbs2</i> | S397  | TSPGRADLPGSSSTFTTSSISSPSS[+80]PSR | TTSFISSPSSPSRAQGGDS      | 11 | S | PKCa  | SSSPSSPSRAQGGD | 6.413  | 4.803 |
| Sorbin and SH3 domain-containing protein 2 | <i>Sorbs2</i> | S397  | TSPGRADLPGSSSTFTTSSISSPSS[+80]PSR | TTSFISSPSSPSRAQGGDS      | 11 | S | PRKCA | FISSPSSPSRAQGG | 16.288 | 7.372 |
| Sorbin and SH3 domain-containing protein 2 | <i>Sorbs2</i> | S397  | TSPGRADLPGSSSTFTTSSISSPSS[+80]PSR | TTSFISSPSSPSRAQGGDS      | 11 | S | PRKCA | SSSPSSPSRAQGGD | 20.136 | 7.372 |
| Sorbin and SH3 domain-containing protein 2 | <i>Sorbs2</i> | S399  | TSPGRADLPGSSSTFTTSSISSPSSP[+80]R  | FISSPSSPSRAQGGDSK        | 10 | S | PKC   | SSSPSSPSRAQGGD | 1.677  | 1.416 |
| Sorbin and SH3 domain-containing protein 2 | <i>Sorbs2</i> | S399  | TSPGRADLPGSSSTFTTSSISSPSSP[+80]R  | FISSPSSPSRAQGGDSK        | 10 | S | PKCa  | SSSPSSPSRAQGGD | 6.413  | 4.803 |
| Sorbin and SH3 domain-containing protein 2 | <i>Sorbs2</i> | S399  | TSPGRADLPGSSSTFTTSSISSPSSP[+80]R  | FISSPSSPSRAQGGDSK        | 10 | S | PRKCA | SSSPSSPSRAQGGD | 20.136 | 7.372 |
| Spectrin alpha chain, non-erythrocytic 1   | <i>Sptan1</i> | S1029 | KLDPAQS[+80]ASRENLEEQGSIALR       | AYVKKLDPAQSASRENLEEQ     | 11 | S | PKC   | KKLDPASASRENLL | 1.613  | 1.416 |
| Spectrin alpha chain, non-erythrocytic 1   | <i>Sptan1</i> | S1029 | KLDPAQS[+80]ASRENLEEQGSIALR       | AYVKKLDPAQSASRENLEEQ     | 11 | S | PKCa  | KKLDPASASRENLL | 8.113  | 4.803 |
| Spectrin alpha chain, non-erythrocytic 1   | <i>Sptan1</i> | S1029 | KLDPAQS[+80]ASRENLEEQGSIALR       | AYVKKLDPAQSASRENLEEQ     | 11 | S | PRKCA | KKLDPASASRENLL | 18.081 | 7.372 |
| Striatin-interacting protein 1             | <i>Strip1</i> | S335  | AAS[+80]PPASADLIEQQK              | IKVIRNMRASPPASADLIE      | 11 | S | PKC   | IRNMRASPPASAD  | 1.904  | 1.416 |
| Striatin-interacting protein 1             | <i>Strip1</i> | S335  | AAS[+80]PPASADLIEQQK              | IKVIRNMRASPPASADLIE      | 11 | S | PKCa  | IRNMRASPPASAD  | 5.126  | 4.803 |
| Striatin-interacting protein 1             | <i>Strip1</i> | S335  | AAS[+80]PPASADLIEQQK              | IKVIRNMRASPPASADLIE      | 11 | S | PRKCA | IRNMRASPPASAD  | 12.409 | 7.372 |
| Supervillin                                | <i>Svil</i>   | S240  | HIPSSPLQQPAS[+80]PSLPGDSPLSTEAR   | IPSSPLQQPASPLPGDSPLS     | 11 | S | PRKCA | SPLQQPASPLPGDS | 9.207  | 7.372 |
| Supervillin                                | <i>Svil</i>   | S242  | HIPSSPLQQPASPS[+80]LPGDSPLSTEAR   | SSPLQQPASPLPGDSSLSTE     | 11 | S | PKC   | LQQPASPLPGDSSL | 1.465  | 1.416 |
| Supervillin                                | <i>Svil</i>   | S242  | HIPSSPLQQPASPS[+80]LPGDSPLSTEAR   | SSPLQQPASPLPGDSSLSTE     | 11 | S | PRKCA | LQQPASPLPGDSSL | 17.394 | 7.372 |
| Supervillin                                | <i>Svil</i>   | S728  | LPS[+80]PTVAR                     | VTH<br>PVTARLPSTVARSSVQP | 11 | S | PKCa  | PVTARLPSTVARSS | 5.961  | 4.803 |
| Supervillin                                | <i>Svil</i>   | S728  | LPS[+80]PTVAR                     | VTH<br>PVTARLPSTVARSSVQP | 11 | S | PRKCA | PVTARLPSTVARSS | 11.949 | 7.372 |
| Supervillin                                | <i>Svil</i>   | S866  | SPS[+80]PVENS DSPVR               | SASAPDYKSPVENS DSPVR     | 11 | S | PKC   | APDYKSPVENS    | 2.494  | 1.416 |
| Supervillin                                | <i>Svil</i>   | S866  | SPS[+80]PVENS DSPVR               | SASAPDYKSPVENS DSPVR     | 11 | S | PKCa  | APDYKSPVENS    | 7.3    | 4.803 |
| Supervillin                                | <i>Svil</i>   | S866  | SPS[+80]PVENS DSPVR               | SASAPDYKSPVENS DSPVR     | 11 | S | PRKCA | APDYKSPVENS    | 15.525 | 7.372 |

|                             |                 |      |                                          |                                                 |    |   |       |                                   |        |        |
|-----------------------------|-----------------|------|------------------------------------------|-------------------------------------------------|----|---|-------|-----------------------------------|--------|--------|
| Synaptopodin                | <i>Synpo</i>    | S525 | HIMARS[+80]PMVER                         | PQPQRHIMARSPMVE<br>RRLVGQ                       | 11 | S | PKCa  | QRHIMARSPMVERR<br>L               | 5.843  | 4.803  |
| Synaptopodin                | <i>Synpo</i>    | S525 | HIMARS[+80]PMVER<br>HLEKVAS[+80]EEEEVPL  | PQPQRHIMARSPMVE<br>RRLVGQ<br>SLLRHLEKVASEEEEEVP | 11 | S | PRKCA | QRHIMARSPMVERR<br>L               | 12.601 | 7.372  |
| Synaptopodin                | <i>Synpo</i>    | S258 | VVYLK<br>HLEKVAS[+80]EEEEVPL             | LVVY<br>SLLRHLEKVASEE                           | 11 | S | PKCa  | RHLEKVASEEEEEVPL                  | 4.965  | 4.803  |
| Synaptopodin                | <i>Synpo</i>    | S258 | VVYLK<br>HLEKVAS[+80]EEEEVPL             | EEVPLVVY<br>SLLRHLEKVASEEEEEVP                  | 11 | S | PKCa  | RHLEKVASEEEEEVPL                  | 4.965  | 4.803  |
| Synaptopodin                | <i>Synpo</i>    | S258 | VVYLK<br>HLEKVAS[+80]EEEEVPL             | EEVPLVVY<br>SLLRHLEKVASEE                       | 11 | S | PRKCA | RHLEKVASEEEEEVPL                  | 12.308 | 7.372  |
| Synaptopodin                | <i>Synpo</i>    | S258 | VVYLK<br>AELASS[+80]PVPNPDH              | EEVPLVVY<br>EPIWRAELASSVPPNP                    | 11 | S | PRKCA | RHLEKVASEEEEEVPL<br>WRAELASSVPPNP | 12.308 | 7.372  |
| Synaptopodin 2-like protein | <i>Synpo2 l</i> | S929 | LESLR<br>S[+80]PSPGELQMLSPL              | DHLES<br>S[+80]PSPGELQMLSPL                     | 11 | S | PRKCA | H                                 | 9.232  | 7.372  |
| Synaptopodin 2-like protein | <i>Synpo2 l</i> | S95  | PGSLR<br>SPPDSEAYYGET[+80]D              | RRVAEEGSRSPSPGELQ<br>LQMLS<br>DSEAYYGETDSDVDGP  | 11 | S | PRKCA | AEEGSRSPSPGELQ<br>AYYGETDSDVDGPA  | 11.98  | 7.372  |
| Synaptopodin 2-like protein | <i>Synpo2 l</i> | T141 | S[+80]DVGDPATHEKPR<br>SPS[+80]PGELQMLSPL | ATHEK                                           | 11 | S | PRKCA | T                                 | 8.747  | 7.372  |
| Synaptopodin 2-like protein | <i>Synpo2 l</i> | S97  | PGSLR<br>SPS[+80]PGELQMLSPL              | VAEEGSRSPSPGELQ<br>MLSPL                        | 11 | S | PKCa  | EGSRSPSPGELQML                    | 7.3    | 4.803  |
| Synaptopodin 2-like protein | <i>Synpo2 l</i> | S97  | PGSLR<br>SPLSPEPPGAPVTQAPQ               | VAEEGSRSPSPGELQ<br>MLSPL                        | 11 | S | PRKCA | EGSRSPSPGELQML                    | 15.838 | 7.372  |
| Synaptopodin-2              | <i>Synpo2</i>   | S895 | AQS[+80]PTPSLPASWK                       | TVQAHTVRAQSPTPSL<br>PASWK                       | 11 | S | PKC   | AHTVRAQSPTPSLPA                   | 1.522  | 1.416  |
| Synaptopodin-2              | <i>Synpo2</i>   | S895 | AQS[+80]PTPSLPASWK                       | PASWK<br>TVQAHTVRAQSPTPSL                       | 11 | S | PKCa  | AHTVRAQSPTPSLPA                   | 6.87   | 4.803  |
| Synaptopodin-2              | <i>Synpo2</i>   | S895 | AQS[+80]PTPSLPASWK                       | PASWK                                           | 11 | S | PRKCA | AHTVRAQSPTPSLPA                   | 14.364 | 7.372  |
| Synaptopodin-2              | <i>Synpo2</i>   | S546 | MQSSVS[+80]ESS[+80]<br>FQMGR             | EESVRMQSSVSESSFQ<br>MGRSL                       | 11 | S | PKCa  | VRMQSSVSESSFQM<br>G               | 6.443  | 4.803  |
| Synaptopodin-2              | <i>Synpo2</i>   | S546 | MQSSVS[+80]ESS[+80]<br>FQMGR             | VRMQSSVSESSFQMG<br>RSLGSV                       | 11 | S | PKCa  | QSSVSESSFQMGRSL                   | 9.609  | 4.803  |
| Synaptopodin-2              | <i>Synpo2</i>   | S546 | MQSSVS[+80]ESS[+80]<br>FQMGR             | EESVRMQSSVSESSFQ<br>MGRSL                       | 11 | S | PRKCA | VRMQSSVSESSFQM<br>G               | 11.146 | 7.372  |
| Synaptopodin-2              | <i>Synpo2</i>   | S546 | MQSSVS[+80]ESS[+80]<br>FQMGR             | VRMQSSVSESSFQMG<br>RSLGSV                       | 11 | S | PRKCA | QSSVSESSFQMGRSL                   | 21.46  | 7.372  |
| Synaptopodin-2              | <i>Synpo2</i>   | S546 | MQSSVS[+80]ESS[+80]<br>FQMGR             | VRMQSSVSESSFQMG<br>RSLGSV                       | 11 | S | PRKCB | QSSVSESSFQMGRSL                   | 21.569 | 10.858 |
| Syncoilin                   | <i>Sync</i>     | S314 | R<br>RLS[+80]TQFENLMAES                  | LMAES<br>GHFLQESRRRLSTQFEN                      | 11 | S | PKC   | LQESRRRLSTQFENLM                  | 2.953  | 1.416  |
| Syncoilin                   | <i>Sync</i>     | S314 | R<br>RLS[+80]TQFENLMAES                  | LMAES<br>GHFLQESRRRLSTQFEN                      | 11 | S | PKCa  | LQESRRRLSTQFENLM                  | 11.204 | 4.803  |
| Syncoilin                   | <i>Sync</i>     | S314 | R<br>RLS[+80]TQFENLMAES                  | LMAES<br>GHFLQESRRRLSTQFEN                      | 11 | S | PRKCA | LQESRRRLSTQFENLM                  | 18.303 | 7.372  |
| Syncoilin                   | <i>Sync</i>     | S314 | R<br>IDFSTPFQVEEVDVSPS                   | LMAES<br>QVEEVDVSPSPKGFV                        | 11 | S | PRKCD | LQESRRRLSTQFENLM                  | 2.544  | 2.514  |
| Synemin                     | <i>Synm</i>     | S780 | [+80]PK<br>IDFSTPFQVEEVDVSPS             | EEEDG<br>QVEEVDVSPSPKGFV                        | 11 | S | PKC   | EVDDVSPSPKGFVEE                   | 2.253  | 1.416  |
| Synemin                     | <i>Synm</i>     | S780 | [+80]PK<br>IDFSTPFQVEEVDVSPS             | EEEDG<br>QVEEVDVSPSPKGFV                        | 11 | S | PKCa  | EVDDVSPSPKGFVEE                   | 5.87   | 4.803  |
| Synemin                     | <i>Synm</i>     | S780 | [+80]PK<br>RS[+80]SPVPRS[+80]P           | EEEDG<br>SVVRESLTKRSSPVPRS                      | 11 | S | PRKCA | EVDDVSPSPKGFVEE                   | 18.01  | 7.372  |
| Synemin                     | <i>Synm</i>     | S104 | DREDGEEAPAGGFLFK<br>RS[+80]SPVPRS[+80]P  | PDRE<br>SVVRESLTKRSSPVPRS                       | 11 | S | PKC   | RESLTKRSSPVPRSP                   | 2.296  | 1.416  |
| Synemin                     | <i>Synm</i>     | S104 | DREDGEEAPAGGFLFK<br>RS[+80]SPVPRS[+80]P  | PDRE<br>SVVRESLTKRSSPVPRS                       | 11 | S | PKCa  | RESLTKRSSPVPRSP                   | 8.196  | 4.803  |
| Synemin                     | <i>Synm</i>     | S104 | DREDGEEAPAGGFLFK<br>RS[+80]SPVPRS[+80]P  | PDRE<br>LTKRSSPVPRSPDRED                        | 11 | S | PRKCA | RESLTKRSSPVPRSP                   | 14.96  | 7.372  |
| Synemin                     | <i>Synm</i>     | S104 | DREDGEEAPAGGFLFK<br>RS[+80]SPVPRS[+80]P  | GEEAP<br>SVVRESLTKRSSPVPRS                      | 11 | S | PRKCA | RSSPVPRSPDREDGE                   | 15.879 | 7.372  |
| Synemin                     | <i>Synm</i>     | S104 | DREDGEEAPAGGFLFK<br>RSS[+80]PVPRS[+80]P  | PDRE<br>VVRESLTKRSSPVPRSP                       | 11 | S | PRKCB | RESLTKRSSPVPRSP                   | 14.948 | 10.858 |
| Synemin                     | <i>Synm</i>     | S104 | DREDGEEAPAGGFLFK<br>RSS[+80]PVPRS[+80]P  | DRED<br>VVRESLTKRSSPVPRSP                       | 11 | S | PKC   | ESLTKRSSPVPRSPD                   | 3.704  | 1.416  |
| Synemin                     | <i>Synm</i>     | S104 | DREDGEEAPAGGFLFK<br>RSS[+80]PVPRS[+80]P  | DRED<br>VVRESLTKRSSPVPRSP                       | 11 | S | PKCa  | ESLTKRSSPVPRSPD                   | 10.183 | 4.803  |
| Synemin                     | <i>Synm</i>     | S104 | DREDGEEAPAGGFLFK<br>RSS[+80]PVPRS[+80]P  | DRED<br>VVRESLTKRSSPVPRSP                       | 11 | S | PRKCA | ESLTKRSSPVPRSPD                   | 13.616 | 7.372  |
| Synemin                     | <i>Synm</i>     | S104 | DREDGEEAPAGGFLFK                         | DRED                                            | 11 | S | PRKCB | ESLTKRSSPVPRSPD                   | 11.586 | 10.858 |

|                           |             |              |                                                |                             |    |   |       |                                   |        |        |
|---------------------------|-------------|--------------|------------------------------------------------|-----------------------------|----|---|-------|-----------------------------------|--------|--------|
| Synemin                   | <i>Sym</i>  | T110<br>4    | VTQGPVSATVEVT[+80]<br>SPTGFVQSHVLEDVVSQ<br>VR  | QGPVSATVEVTSPTGF<br>VQSHV   | 11 | T | PRKCA | VSATVEVTSPTGFVQ                   | 8.106  | 7.372  |
| Synemin                   | <i>Sym</i>  | S110<br>5    | VTQGPVSATVEVTS[+8<br>0]PTGFVQSHVLEDVVSQ<br>SVR | GPVSATVEVTSPTGFV<br>QSHVL   | 11 | S | PRKCA | SATVEVTSPTGFVQS                   | 10.101 | 7.372  |
| Talin-1                   | <i>Tln1</i> | S979         | GSQAQPD[+80]PSAQ<br>LALIAASQSFQPGGK            | GVRGSQAQPDSPSAQ<br>LALIAA   | 11 | S | PKC   | GSQAQPDSPSAQLA<br>L               | 2.02   | 1.416  |
| Talin-1                   | <i>Tln1</i> | S979         | LALIAASQSFQPGGK<br>GSQAQPDSP[+80]AQ            | GVRGSQAQPDSPSAQ<br>LALIAA   | 11 | S | PRKCA | GSQAQPDSPSAQLA<br>L               | 14.49  | 7.372  |
| Talin-1                   | <i>Tln1</i> | S981         | LALIAASQSFQPGGK<br>GSQAQPDSP[+80]AQ            | RGSQAQPDSPSAQLA<br>LIAASQ   | 11 | S | PKC   | QAQPDSPSAQLALIA                   | 1.727  | 1.416  |
| Talin-1                   | <i>Tln1</i> | S981         | LALIAASQSFQPGGK<br>GSQAQPDSP[+80]AQ            | RGSQAQPDSPSAQLA<br>LIAASQ   | 11 | S | PRKCA | QAQPDSPSAQLALIA<br>RTLSRSMSEQAQRG | 17.859 | 7.372  |
| Telethonin                | <i>Tcap</i> | S161         | SMS[+80]QEAQRG                                 | PLRRTLRSRSMSEQAQR<br>G      | 11 | S | PKC   | *<br>RTLSRSMSEQAQRG               | 2.633  | 1.416  |
| Telethonin                | <i>Tcap</i> | S161         | SMS[+80]QEAQRG                                 | PLRRTLRSRSMSEQAQR<br>G      | 11 | S | PKCa  | *<br>RTLSRSMSEQAQRG               | 10.717 | 4.803  |
| Telethonin                | <i>Tcap</i> | S161         | SMS[+80]QEAQRG                                 | PLRRTLRSRSMSEQAQR<br>G      | 11 | S | PKCd  | *<br>RTLSRSMSEQAQRG               | 3.838  | 3.771  |
| Telethonin                | <i>Tcap</i> | S161         | SMS[+80]QEAQRG                                 | PLRRTLRSRSMSEQAQR<br>G      | 11 | S | PRKCA | *<br>RTLSRSMSEQAQRG               | 21.247 | 7.372  |
| Telethonin                | <i>Tcap</i> | S161         | SMS[+80]QEAQRG                                 | PLRRTLRSRSMSEQAQR<br>G      | 11 | S | PRKCB | *<br>RTLSRSMSEQAQRG               | 15.948 | 10.858 |
| Tensin 2                  | <i>Tns2</i> | S455         | WDS[+80]YENFNQHHE<br>DSVDGSLAHR                | NMTEPAVRWDSYENF<br>NQHHED   | 11 | S | PKC   | EPAVRWDSYENFNQ<br>H               | 1.474  | 1.416  |
| Tensin 2                  | <i>Tns2</i> | S455         | WDS[+80]YENFNQHHE<br>DSVDGSLAHR                | NMTEPAVRWDSYENF<br>NQHHED   | 11 | S | PKCa  | EPAVRWDSYENFNQ<br>H               | 6.635  | 4.803  |
| Tensin 2                  | <i>Tns2</i> | S455         | WDS[+80]YENFNQHHE<br>DSVDGSLAHR                | NMTEPAVRWDSYENF<br>NQHHED   | 11 | S | PRKCA | EPAVRWDSYENFNQ<br>H               | 16.944 | 7.372  |
| Tensin-1                  | <i>Tln1</i> | S108<br>1    | AASDGQYENQS[+80]P<br>EATSPR                    | AASDGQYENQSPEAT<br>SPRSPG   | 11 | S | PKCa  | DGQYENQSPEATSP<br>R               | 5.096  | 4.803  |
| Tensin-1                  | <i>Tln1</i> | S108<br>1    | AASDGQYENQS[+80]P<br>EATSPR                    | AASDGQYENQSPEAT<br>SPRSPG   | 11 | S | PRKCA | DGQYENQSPEATSP<br>R               | 12.692 | 7.372  |
| Tensin-1                  | <i>Tln1</i> | S103<br>2    | ETTS[+80]RTPEEEL<br>LNLEGLVAHR                 | LPLKETTSDTSRTPEEE<br>PLNL   | 11 | S | PKCa  | KETTSDTSRTPEEEL<br>H              | 6.361  | 4.803  |
| Tensin-1                  | <i>Tln1</i> | S103<br>2    | ETTS[+80]RTPEEEL<br>LNLEGLVAHR                 | LPLKETTSDTSRTPEEE<br>PLNL   | 11 | S | PRKCA | KETTSDTSRTPEEEL<br>H              | 13.758 | 7.372  |
| Tensin-1                  | <i>Tln1</i> | S148<br>0    | HLGGS[+80]GSVVP<br>SLDR                        | SPSLGRHLGGSGSVVP<br>GSPSL   | 11 | S | PRKCA | LGRHLGGSGSVVPGS                   | 12.015 | 7.372  |
| Tensin-1                  | <i>Tln1</i> | T150<br>1    | HVAYGGYST[+80]PEDR<br>S[+80]GYIPSGDTLGAPE      | DRHVAYGGYSTPEDR<br>RPTLSR   | 11 | T | PRKCA | VAYGGYSTPEDRRPT                   | 8.298  | 7.372  |
| Tensin-1                  | <i>Tln1</i> | S949<br>S122 | LLSSGR<br>SFS[+80]APATHAYGHE                   | GDTLG<br>RAQDVEPKSFSAPATH   | 11 | S | PRKCA | HPLTQSRSGYIPSGD                   | 12.455 | 7.372  |
| Tensin-1                  | <i>Tln1</i> | S122<br>2    | TPLR<br>SFS[+80]APATHAYGHE                     | AYGHE<br>RAQDVEPKSFSAPATH   | 11 | S | PKC   | DVEPKSFSAPATHAY                   | 2.302  | 1.416  |
| Tensin-1                  | <i>Tln1</i> | S122<br>2    | TPLR<br>SFS[+80]APATHAYGHE                     | AYGHE<br>RAQDVEPKSFSAPATH   | 11 | S | PKCa  | DVEPKSFSAPATHAY                   | 7.67   | 4.803  |
| Tensin-1                  | <i>Tln1</i> | S122<br>2    | TPLR<br>SFS[+80]APATHAYGHE                     | AYGHE<br>RAQDVEPKSFSAPATH   | 11 | S | PRKCA | DVEPKSFSAPATHAY                   | 13.475 | 7.372  |
| Tensin-3                  | <i>Tns3</i> | S773         | KLS[+80]IGQYDNDAGS<br>QVTFK                    | DPVGGRLRKLKLSIGQYD<br>NDAGS | 11 | S | PKC   | GGRLRKLKLSIGQYDND                 | 4.065  | 1.416  |
| Tensin-3                  | <i>Tns3</i> | S773         | KLS[+80]IGQYDNDAGS<br>QVTFK                    | DPVGGRLRKLKLSIGQYD<br>NDAGS | 11 | S | PKCa  | GGRLRKLKLSIGQYDND                 | 9.513  | 4.803  |
| Tensin-3                  | <i>Tns3</i> | S773<br>S339 | KLS[+80]IGQYDNDAGS<br>QVTFK                    | DPVGGRLRKLKLSIGQYD<br>NDAGS | 11 | S | PRKCA | GGRLRKLKLSIGQYDND                 | 19.641 | 7.372  |
| Titin                     | <i>Ttn</i>  | 61<br>S339   | EETS[+80]TSYAELR                               | TYHVPTKEETSTSYAEL<br>RERH   | 11 | S | PRKCA | VPTKEETSTSYAELR                   | 14.449 | 7.372  |
| Titin                     | <i>Ttn</i>  | 61<br>T339   | EETS[+80]TSYAELR                               | TYHVPTKEETSTSYAEL<br>RERH   | 11 | S | PRKCB | VPTKEETSTSYAELR                   | 12.207 | 10.858 |
| Titin                     | <i>Ttn</i>  | 62<br>T339   | EETST[+80]SYAELR                               | YHVPTKEETSTSYAEL<br>ERHA    | 11 | T | PKC   | PTKEETSTSYAELRE                   | 1.449  | 1.416  |
| Titin                     | <i>Ttn</i>  | 62<br>S179   | EETST[+80]SYAELR                               | YHVPTKEETSTSYAEL<br>ERHA    | 11 | T | PRKCA | PTKEETSTSYAELRE                   | 8.652  | 7.372  |
| Titin                     | <i>Ttn</i>  | 84<br>T340   | RSDTGLYS[+80]ITAVN<br>NLGTASK                  | QSRSDTGLYSITAVN<br>NLGTA    | 11 | S | PRKCA | RSDTGLYSITAVNNL                   | 10.591 | 7.372  |
| Titin                     | <i>Ttn</i>  | 67<br>T340   | SLSP[+80]YIELMRPV<br>ELIR                      | LLRRRRLSPTYIELMR<br>PVSE    | 11 | T | PKC   | RRRSLSPTYIELMRP                   | 3.365  | 1.416  |
| Titin                     | <i>Ttn</i>  | 67<br>T340   | SLSP[+80]YIELMRPV<br>ELIR                      | LLRRRRLSPTYIELMR<br>PVSE    | 11 | T | PRKCA | RRRSLSPTYIELMRP                   | 9.909  | 7.372  |
| Tropomyosin alpha-1 chain | <i>Tpm1</i> | T282         | YKAISEELDHALNDMT[<br>+80]SI                    | EELDHALNDMTSI               | 11 | T | PRKCA | DHALNDMTSI*****                   | 13.793 | 7.372  |



|                                       |                |      |                               |                        |    |   |       |                  |        |        |
|---------------------------------------|----------------|------|-------------------------------|------------------------|----|---|-------|------------------|--------|--------|
| Tropomyosin alpha-1 chain             | <i>Tpm1</i>    | S283 | YKAISEELDHALNDMTS[+80]I       | KELDHALNDMTSI          | 12 | S | PKCa  | HALNDMTSI*****   | 5.209  | 4.803  |
| Tropomyosin alpha-1 chain             | <i>Tpm1</i>    | S283 | YKAISEELDHALNDMTS[+80]I       | KELDHALNDMTSI          | 12 | S | PRKCA | HALNDMTSI*****   | 22.707 | 7.372  |
| Tropomyosin alpha-1 chain             | <i>Tpm1</i>    | S283 | YKAISEELDHALNDMTS[+80]I       | KELDHALNDMTSI          | 12 | S | PRKCB | HALNDMTSI*****   | 18.207 | 10.858 |
| Utrophin                              | <i>Utrn</i>    | S933 | AAQAS[+80]LSALNDPS AVEQALQEK  | LSESEKAAQASLSALN DPSAV | 11 | S | PKC   | SEKAAQASLSALNDP  | 2.767  | 1.416  |
| Utrophin                              | <i>Utrn</i>    | S933 | AAQAS[+80]LSALNDPS AVEQALQEK  | LSESEKAAQASLSALN DPSAV | 11 | S | PKCa  | SEKAAQASLSALNDP  | 4.935  | 4.803  |
| Utrophin                              | <i>Utrn</i>    | S933 | AAQAS[+80]LSALNDPS AVEQALQEK  | LSESEKAAQASLSALN DPSAV | 11 | S | PRKCA | SEKAAQASLSALNDP  | 13.556 | 7.372  |
| Utrophin                              | <i>Utrn</i>    | S935 | AAQASLS[+80]ALNDPS AVEQALQEK  | ESEKAAQASLSALNDP SAVEQ | 11 | S | PKC   | KAAQASLSALNDPSA  | 1.777  | 1.416  |
| Utrophin                              | <i>Utrn</i>    | S935 | AAQASLS[+80]ALNDPS AVEQALQEK  | ESEKAAQASLSALNDP SAVEQ | 11 | S | PRKCA | KAAQASLSALNDPSA  | 11.586 | 7.372  |
| Vasodilator-stimulated phosphoprotein | <i>Vasp</i>    | S236 | KVS[+80]KEEASGGPLA PK         | AIAGAKLRKVSKEEAS GGPLA | 11 | S | PKC   | GAKLRKVSKEEASGG  | 6.976  | 1.416  |
| Vasodilator-stimulated phosphoprotein | <i>Vasp</i>    | S236 | KVS[+80]KEEASGGPLA PK         | AIAGAKLRKVSKEEAS GGPLA | 11 | S | PKCa  | GAKLRKVSKEEASGG  | 9.561  | 4.803  |
| Vasodilator-stimulated phosphoprotein | <i>Vasp</i>    | S236 | KVS[+80]KEEASGGPLA PK         | AIAGAKLRKVSKEEAS GGPLA | 11 | S | PKCd  | GAKLRKVSKEEASGG  | 3.784  | 3.771  |
| Vasodilator-stimulated phosphoprotein | <i>Vasp</i>    | S236 | KVS[+80]KEEASGGPLA PK         | AIAGAKLRKVSKEEAS GGPLA | 11 | S | PRKCA | GAKLRKVSKEEASGG  | 20.768 | 7.372  |
| Vasodilator-stimulated phosphoprotein | <i>Vasp</i>    | S236 | KVS[+80]KEEASGGPLA PK         | AIAGAKLRKVSKEEAS GGPLA | 11 | S | PRKCB | GAKLRKVSKEEASGG  | 14.034 | 10.858 |
| Vinculin                              | <i>Vcl</i>     | S579 | ALASQLQDS[+80]LKDL K          | ARALASQLQDSLKDLK TQMQE | 11 | S | PKC   | LASQLQDSLKDLKTQ  | 5.424  | 1.416  |
| Vinculin                              | <i>Vcl</i>     | S579 | ALASQLQDS[+80]LKDL K          | ARALASQLQDSLKDLK AQMQE | 11 | S | PKC   | LASQLQDSLKDLKAQ  | 5.639  | 1.416  |
| Vinculin                              | <i>Vcl</i>     | S579 | ALASQLQDS[+80]LKDL K          | ARALASQLQDSLKDLK TQMQE | 11 | S | PKCa  | LASQLQDSLKDLKTQ  | 5.443  | 4.803  |
| Vinculin                              | <i>Vcl</i>     | S579 | ALASQLQDS[+80]LKDL K          | ARALASQLQDSLKDLK AQMQE | 11 | S | PKCa  | LASQLQDSLKDLKAQ  | 5.752  | 4.803  |
| Vinculin                              | <i>Vcl</i>     | S579 | ALASQLQDS[+80]LKDL K          | ARALASQLQDSLKDLK TQMQE | 11 | S | PRKCA | LASQLQDSLKDLKTQ  | 22.015 | 7.372  |
| Vinculin                              | <i>Vcl</i>     | S579 | ALASQLQDS[+80]LKDL K          | ARALASQLQDSLKDLK AQMQE | 11 | S | PRKCA | LASQLQDSLKDLKAQ  | 21.803 | 7.372  |
| Vinculin                              | <i>Vcl</i>     | S579 | ALASQLQDS[+80]LKDL K          | ARALASQLQDSLKDLK TQMQE | 11 | S | PRKCB | LASQLQDSLKDLKTQ  | 12.586 | 10.858 |
| Vinculin                              | <i>Vcl</i>     | S579 | ALASQLQDS[+80]LKDL K          | ARALASQLQDSLKDLK AQMQE | 11 | S | PRKCB | LASQLQDSLKDLKAQ  | 12.31  | 10.858 |
| Vinculin                              | <i>Vcl</i>     | S346 | ARGQGAS[+80]PVAM QK           | ADLRARGQGASPVAM QKAQQV | 11 | S | PKC   | RARGQGASPVAMQ KA | 1.801  | 1.416  |
| Vinculin                              | <i>Vcl</i>     | S346 | ARGQGAS[+80]PVAM QK           | ADLRARGQGASPVAM QKAQQV | 11 | S | PRKCA | RARGQGASPVAMQ KA | 8.091  | 7.372  |
| Vinculin                              | <i>Vcl</i>     | S290 | GWLRDPNAS[+80]PGD AGEQAIR     | AKGWLDPNASPGDA GEQAIR  | 11 | S | PRKCA | WLRDPNASPGDAGE Q | 12.535 | 7.372  |
| Vinculin                              | <i>Vcl</i>     | S97  | LVQAAQMLQS[+80]DP YSVPAR      | KLVQAAQMLQSDPYS VPARDY | 11 | S | PRKCA | QAAQMLQSDPYSVP A | 9.838  | 7.372  |
| Vinculin                              | <i>Vcl</i>     | T719 | MTGLVDEAIDT[+80]KS LLDASEEAIK | MTGLVDEAIDTKSLLD ASEEA | 11 | T | PRKCA | LVDEAIDTKSLLDAS  | 7.813  | 7.372  |
| Vinculin                              | <i>Vcl</i>     | S721 | MTGLVDEAIDTKS[+80] LLDASEEAIK | GLVDEAIDTKSLLDASE EAIK | 11 | S | PKC   | DEAIDTKSLLDASEE  | 2.078  | 1.416  |
| Vinculin                              | <i>Vcl</i>     | S721 | MTGLVDEAIDTKS[+80] LLDASEEAIK | GLVDEAIDTKSLLDASE EAIK | 11 | S | PRKCA | DEAIDTKSLLDASEE  | 15.97  | 7.372  |
| Vinculin                              | <i>Vcl</i>     | S795 | TIS[+80]PMVM DAK              | AASDELSKTISPMVMD AKAVA | 11 | S | PKC   | DELSKTISPMVM DAK | 1.568  | 1.416  |
| Vinculin                              | <i>Vcl</i>     | S795 | TIS[+80]PMVM DAK              | AASDELSKTISPMVMD AKAVA | 11 | S | PRKCA | DELSKTISPMVM DAK | 11.823 | 7.372  |
| Vinculin                              | <i>Vcl</i>     | T602 | TQMQEAMTQEVSDVF SDT[+80]TTPIK | TQEVSDVFSDDTTPIKL LAVA | 11 | T | PRKCA | VSDVFSDDTTPIKLL  | 8.439  | 7.372  |
| WASH complex subunit 2                | <i>Washc 2</i> | S611 | ASALFSS[+80]DEEDQW SVADSQTK   | PPKKASALFSSDEEDQ WSVAD | 11 | S | PRKCA | KASALFSSDEEDQWS  | 8.535  | 7.372  |
| WASH complex subunit 2                | <i>Washc 2</i> | S387 | GQPAQGPVSEESPPS[+80]PKPGK     | QGPVSEESPPSPKPGK KIPAG | 11 | S | PKC   | VSEESPPSPKPGKKI  | 2.382  | 1.416  |
| WASH complex subunit 2                | <i>Washc 2</i> | S387 | GQPAQGPVSEESPPS[+80]PKPGK     | QGPVSEESPPSPKPGK KIPAG | 11 | S | PKCa  | VSEESPPSPKPGKKI  | 9.196  | 4.803  |

|                                               |                |        |                                |                         |    |   |       |                  |        |        |
|-----------------------------------------------|----------------|--------|--------------------------------|-------------------------|----|---|-------|------------------|--------|--------|
| WASH complex subunit 2                        | <i>Washc 2</i> | S387   | GQPAQGPVSEESPPS[+80]PKPGK      | QGPVSEESPPSPKPGK KIPAG  | 11 | S | PRKCA | VSEESPPSPKPGKKI  | 16.596 | 7.372  |
| WASH complex subunit 2                        | <i>Washc 2</i> | S387   | GQPAQGPVSEESPPS[+80]PKPGK      | QGPVSEESPPSPKPGK KIPAG  | 11 | S | PRKCB | VSEESPPSPKPGKKI  | 12.707 | 10.858 |
| Whirlin                                       | <i>Whrn</i>    | S637   | NRS[+80]PPPPGIAPT PTPGPSSAR    | GIVFSAPRNRSPPPPP GIAPT  | 11 | S | PKCa  | FSAPRNRSPPPPPGI  | 5.265  | 4.803  |
| Whirlin                                       | <i>Whrn</i>    | S637   | NRS[+80]PPPPGIAPT PTPGPSSAR    | GIVFSAPRNRSPPPPP GIAPT  | 11 | S | PRKCA | FSAPRNRSPPPPPGI  | 16.854 | 7.372  |
| Xin actin-binding repeat-containing protein 1 | <i>Xirp1</i>   | S332   | DFQPS[+80]PDLIPPG DVQHQR       | IEVDEKDFQPSDLIPP GPDV   | 11 | S | PRKCA | DEKDFQPSDLIPPG   | 10.46  | 7.372  |
| Xin actin-binding repeat-containing protein 1 | <i>Xirp1</i>   | S332   | DFQPS[+80]PDLIPPG DVQHQR       | ILVDEKDFQPSDLIPP GPDV   | 11 | S | PRKCA | DEKDFQPSDLIPPG   | 10.46  | 7.372  |
| Xin actin-binding repeat-containing protein 1 | <i>Xirp1</i>   | S295   | GIS[+80]LEEGALPDVSA TR         | PSQVRVIRGISLEEGAL PDVS  | 11 | S | PRKCA | VRVIRGISLEEGALP  | 17.455 | 7.372  |
| Xin actin-binding repeat-containing protein 1 | <i>Xirp1</i>   | S726   | GVQETVLS[+80]PGSIPT GSVHK      | GKRGVQETVLSPGSIP TGSVH  | 11 | S | PRKCA | GVQETVLSPGSIPTG  | 7.525  | 7.372  |
| Xin actin-binding repeat-containing protein 1 | <i>Xirp1</i>   | S532   | SPS[+80]TVDVVR                 | QPLDRLGRSPSTDVV RGITR   | 11 | S | PKC   | DRLGRSPSTDVVVRG  | 2.512  | 1.416  |
| Xin actin-binding repeat-containing protein 1 | <i>Xirp1</i>   | S532   | SPS[+80]TVDVVR                 | QPLDRLGRSPSTDVV RGITR   | 11 | S | PKCa  | DRLGRSPSTDVVVRG  | 8.478  | 4.803  |
| Xin actin-binding repeat-containing protein 1 | <i>Xirp1</i>   | S532   | SPS[+80]TVDVVR                 | QPLDRLGRSPSTDVV RGITR   | 11 | S | PRKCA | DRLGRSPSTDVVVRG  | 17.566 | 7.372  |
| Xin actin-binding repeat-containing protein 2 | <i>Xirp2</i>   | S219 8 | AKMS[+80]QDSPSGELE R           | KLPERIKAKMSQDSPS GELER  | 11 | S | PKC   | ERIKAKMSQDSPSGE  | 4.122  | 1.416  |
| Xin actin-binding repeat-containing protein 2 | <i>Xirp2</i>   | S219 8 | AKMS[+80]QDSPSGELE R           | KLPERIKAKMSQDSPS GELER  | 11 | S | PRKCA | ERIKAKMSQDSPSGE  | 13.444 | 7.372  |
| Xin actin-binding repeat-containing protein 2 | <i>Xirp2</i>   | S219 8 | AKMS[+80]QDSPSGELE R           | KLPERIKAKMSQDSPS GELER  | 11 | S | PRKCB | ERIKAKMSQDSPSGE  | 15.897 | 10.858 |
| Xin actin-binding repeat-containing protein 2 | <i>Xirp2</i>   | S298 7 | GGDS[+80]PPTITIPVSV NHHVVSGSFR | QKIESRGGDSPPTITIP VSV   | 11 | S | PRKCA | IESRGGDSPPTITIP  | 10.328 | 7.372  |
| Xin actin-binding repeat-containing protein 2 | <i>Xirp2</i>   | S813   | GIS[+80]AQEQIAGNVK             | LHKFQIRGISAQEQIQA GNVK  | 11 | S | PKC   | FQIRGISAQEQIAG   | 2.138  | 1.416  |
| Xin actin-binding repeat-containing protein 2 | <i>Xirp2</i>   | S813   | GIS[+80]AQEQIAGNVK             | LHKFQIRGISAQEQIQA GNVK  | 11 | S | PKCa  | FQIRGISAQEQIAG   | 4.93   | 4.803  |
| Xin actin-binding repeat-containing protein 2 | <i>Xirp2</i>   | S813   | GIS[+80]AQEQIAGNVK             | LHKFQIRGISAQEQIQA GNVK  | 11 | S | PRKCA | FQIRGISAQEQIAG   | 18.354 | 7.372  |
| Xin actin-binding repeat-containing protein 2 | <i>Xirp2</i>   | S565   | GIS[+80]MEENVK                 | ITEIKVVRGISMEEENVK GEVG | 11 | S | PKC   | IKVVRGISMEEENVKG | 2.165  | 1.416  |
| Xin actin-binding repeat-containing protein 2 | <i>Xirp2</i>   | S565   | GIS[+80]MEENVK                 | ITEIKVVRGISMEEENVK GEVG | 11 | S | PKCa  | IKVVRGISMEEENVKG | 8.035  | 4.803  |
| Xin actin-binding repeat-containing protein 2 | <i>Xirp2</i>   | S565   | GIS[+80]MEENVK                 | ITEIKVVRGISMEEENVK GEVG | 11 | S | PRKCA | IKVVRGISMEEENVKG | 19.47  | 7.372  |
| Xin actin-binding repeat-containing protein 2 | <i>Xirp2</i>   | S225 2 | KQLS[+80]ISSANLSQT VPEIPAPK    | FRKSLGRKQLSISSANS LSQT  | 11 | S | PKC   | SLGRKQLSISSANS   | 4.935  | 1.416  |
| Xin actin-binding repeat-containing protein 2 | <i>Xirp2</i>   | S225 2 | KQLS[+80]ISSANLSQT VPEIPAPK    | FRKSLGRKQLSISSANS LSQT  | 11 | S | PKCa  | SLGRKQLSISSANS   | 11.935 | 4.803  |
| Xin actin-binding repeat-containing protein 2 | <i>Xirp2</i>   | S225 2 | KQLS[+80]ISSANLSQT VPEIPAPK    | FRKSLGRKQLSISSANS LSQT  | 11 | S | PRKCA | SLGRKQLSISSANS   | 19.348 | 7.372  |
| Xin actin-binding repeat-containing protein 2 | <i>Xirp2</i>   | S225 2 | KQLS[+80]ISSANLSQT VPEIPAPK    | FRKSLGRKQLSISSANS LSQT  | 11 | S | PRKCB | SLGRKQLSISSANS   | 11.155 | 10.858 |

|                                               |              |       |                              |                        |    |   |       |                  |        |        |
|-----------------------------------------------|--------------|-------|------------------------------|------------------------|----|---|-------|------------------|--------|--------|
| Xin actin-binding repeat-containing protein 2 | <i>Xirp2</i> | S2254 | KQLSIS[+80]SANSLSQT VPEIPAPK | KSLGRKQLSISSANSLS QTVP | 11 | S | PKC   | GRKQLSISSANSLSQ  | 2.863  | 1.416  |
| Xin actin-binding repeat-containing protein 2 | <i>Xirp2</i> | S2254 | KQLSIS[+80]SANSLSQT VPEIPAPK | KSLGRKQLSISSANSLS QTVP | 11 | S | PRKCA | GRKQLSISSANSLSQ  | 14.808 | 7.372  |
| Xin actin-binding repeat-containing protein 2 | <i>Xirp2</i> | S2255 | KQLSISS[+80]ANSLSQT VPEIPAPK | SLGRKQLSISSANSLSQ TVPE | 11 | S | PKCa  | RKQLSISSANSLSQT  | 6.513  | 4.803  |
| Xin actin-binding repeat-containing protein 2 | <i>Xirp2</i> | S2255 | KQLSISS[+80]ANSLSQT VPEIPAPK | SLGRKQLSISSANSLSQ TVPE | 11 | S | PRKCA | RKQLSISSANSLSQT  | 12.505 | 7.372  |
| Xin actin-binding repeat-containing protein 2 | <i>Xirp2</i> | S2258 | KQLSISSANS[+80]LSQT VPEIPAPK | RKQLSISSANSLSQTVP EIPA | 11 | S | PKCa  | LSISSANSLSQTVPE  | 7.065  | 4.803  |
| Xin actin-binding repeat-containing protein 2 | <i>Xirp2</i> | S2258 | KQLSISSANS[+80]LSQT VPEIPAPK | RKQLSISSANSLSQTVP EIPA | 11 | S | PRKCA | LSISSANSLSQTVPE  | 20.232 | 7.372  |
| Xin actin-binding repeat-containing protein 2 | <i>Xirp2</i> | S2260 | KQLSISSANSLS[+80]QT VPEIPAPK | QLSISSANSLSQTVPEI PPAK | 11 | S | PKCa  | ISSANSLSQTVPEIP  | 4.93   | 4.803  |
| Xin actin-binding repeat-containing protein 2 | <i>Xirp2</i> | S2260 | KQLSISSANSLS[+80]QT VPEIPAPK | QLSISSANSLSQTVPEI PPAK | 11 | S | PRKCA | ISSANSLSQTVPEIP  | 11.955 | 7.372  |
| Xin actin-binding repeat-containing protein 2 | <i>Xirp2</i> | S2970 | SEVVMS[+80]PATLR             | IVEKRSEVVMSPATLR RQIKI | 11 | S | PKC   | KRSEVVMSPATLRR Q | 1.793  | 1.416  |
| Xin actin-binding repeat-containing protein 2 | <i>Xirp2</i> | S2970 | SEVVMS[+80]PATLR             | VVEKRSEVVMSPATLR RQIKI | 11 | S | PKC   | KRSEVVMSPATLRR Q | 1.771  | 1.416  |
| Xin actin-binding repeat-containing protein 2 | <i>Xirp2</i> | S2970 | SEVVMS[+80]PATLR             | IVEKRSEVVMSPATLR RQIKI | 11 | S | PRKCB | KRSEVVMSPATLRR Q | 10.897 | 10.858 |
| Xin actin-binding repeat-containing protein 2 | <i>Xirp2</i> | S2970 | SEVVMS[+80]PATLR             | VVEKRSEVVMSPATLR RQIKI | 11 | S | PRKCB | KRSEVVMSPATLRR Q | 10.897 | 10.858 |
| Xin actin-binding repeat-containing protein 2 | <i>Xirp2</i> | S2291 | SHSFPSGSEQQS[+80]P KPYMR     | HSFSPGSEQQSPKPY MRKFKT | 11 | S | PKC   | PSGSEQQSPKPYMR K | 3.142  | 1.416  |
| Xin actin-binding repeat-containing protein 2 | <i>Xirp2</i> | S2291 | SHSFPSGSEQQS[+80]P KPYMR     | HSFSPGSEQQSPKPY MRKFKT | 11 | S | PKCa  | PSGSEQQSPKPYMR K | 9.752  | 4.803  |
| Xin actin-binding repeat-containing protein 2 | <i>Xirp2</i> | S2291 | SHSFPSGSEQQS[+80]P KPYMR     | HSFSPGSEQQSPKPY MRKFKT | 11 | S | PRKCA | PSGSEQQSPKPYMR K | 18.298 | 7.372  |
| Xin actin-binding repeat-containing protein 2 | <i>Xirp2</i> | S2211 | SLS[+80]DVEIK                | SPSGELERSLSDVEIKTT LSK | 11 | S | PRKCA | GELERSLSDVEIKTT  | 9.985  | 7.372  |
| Xin actin-binding repeat-containing protein 2 | <i>Xirp2</i> | S2211 | SLS[+80]DVEIK                | SSSGELERSLSDVEIKA TLSK | 11 | S | PRKCA | GELERSLSDVEIKAT  | 9.98   | 7.372  |
| Xin actin-binding repeat-containing protein 2 | <i>Xirp2</i> | S2211 | SLS[+80]DVEIK                | SPSGELERSLSDVEIKTT LSK | 11 | S | PRKCB | GELERSLSDVEIKTT  | 11.517 | 10.858 |
| Xin actin-binding repeat-containing protein 2 | <i>Xirp2</i> | S2211 | SLS[+80]DVEIK                | SSSGELERSLSDVEIKA TLSK | 11 | S | PRKCB | GELERSLSDVEIKAT  | 11.19  | 10.858 |
| Xin actin-binding repeat-containing protein 2 | <i>Xirp2</i> | S2873 | TRPPS[+80]PTFITIESTA R       | APPSLKTRPPSPTFITIE STA | 11 | S | PKC   | SLKTRPPSPTFITIE  | 2.034  | 1.416  |
| Xin actin-binding repeat-containing protein 2 | <i>Xirp2</i> | S2873 | TRPPS[+80]PTFITIESTA R       | APPSLKTRPPSPTFITIE STA | 11 | S | PRKCA | SLKTRPPSPTFITIE  | 12.586 | 7.372  |
| Xin actin-binding repeat-containing protein 2 | <i>Xirp2</i> | T2875 | TRPPSPT[+80]FITIESTA R       | PSLKTRPPSPTFITIEST ARR | 11 | T | PKC   | KTRPPSPTFITIEST  | 1.502  | 1.416  |
| Xin actin-binding repeat-containing protein 2 | <i>Xirp2</i> | T2875 | TRPPSPT[+80]FITIESTA R       | PSLKTRPPSPTFITIEST ARR | 11 | T | PRKCA | KTRPPSPTFITIEST  | 9.934  | 7.372  |
| Xin actin-binding repeat-containing protein 2 | <i>Xirp2</i> | S1573 | TVS[+80]ETDIIPGDVR           | KRQSSIERTVSETDIIPG DVR | 11 | S | PKC   | SSIERTVSETDIIPG  | 1.633  | 1.416  |

|                                               |              |       |                              |                           |    |   |       |                 |        |       |
|-----------------------------------------------|--------------|-------|------------------------------|---------------------------|----|---|-------|-----------------|--------|-------|
| Xin actin-binding repeat-containing protein 2 | <i>Xirp2</i> | S1573 | TVS[+80]ETDIIPGDVR           | KRQSSIERTVSETDIIPG<br>DVR | 11 | S | PRKCA | SSIERTVSETDIIPG | 12.551 | 7.372 |
| Xin actin-binding repeat-containing protein 2 | <i>Xirp2</i> | S1210 | TVS[+80]INEIQK               | GDKKNYVRTVSINEIQ<br>KGNVK | 11 | S | PKC   | KNYVRTVSINEIQKG | 3.548  | 1.416 |
| Xin actin-binding repeat-containing protein 2 | <i>Xirp2</i> | S1210 | TVS[+80]INEIQK               | GDKKNYVRTVSINEIQ<br>KGNVK | 11 | S | PKCa  | KNYVRTVSINEIQKG | 10.022 | 4.803 |
| Xin actin-binding repeat-containing protein 2 | <i>Xirp2</i> | S1210 | TVS[+80]INEIQK               | GDKKNYVRTVSINEIQ<br>KGNVK | 11 | S | PRKCA | KNYVRTVSINEIQKG | 18.328 | 7.372 |
| Xin actin-binding repeat-containing protein 2 | <i>Xirp2</i> | S3246 | VFKS[+80]VGYETSDAH<br>ATEMSR | TWQESERVFKSVGYET<br>SDAHA | 11 | S | PRKCA | ESERVFKSVGYETSD | 11.965 | 7.372 |

## Online Figures I - II

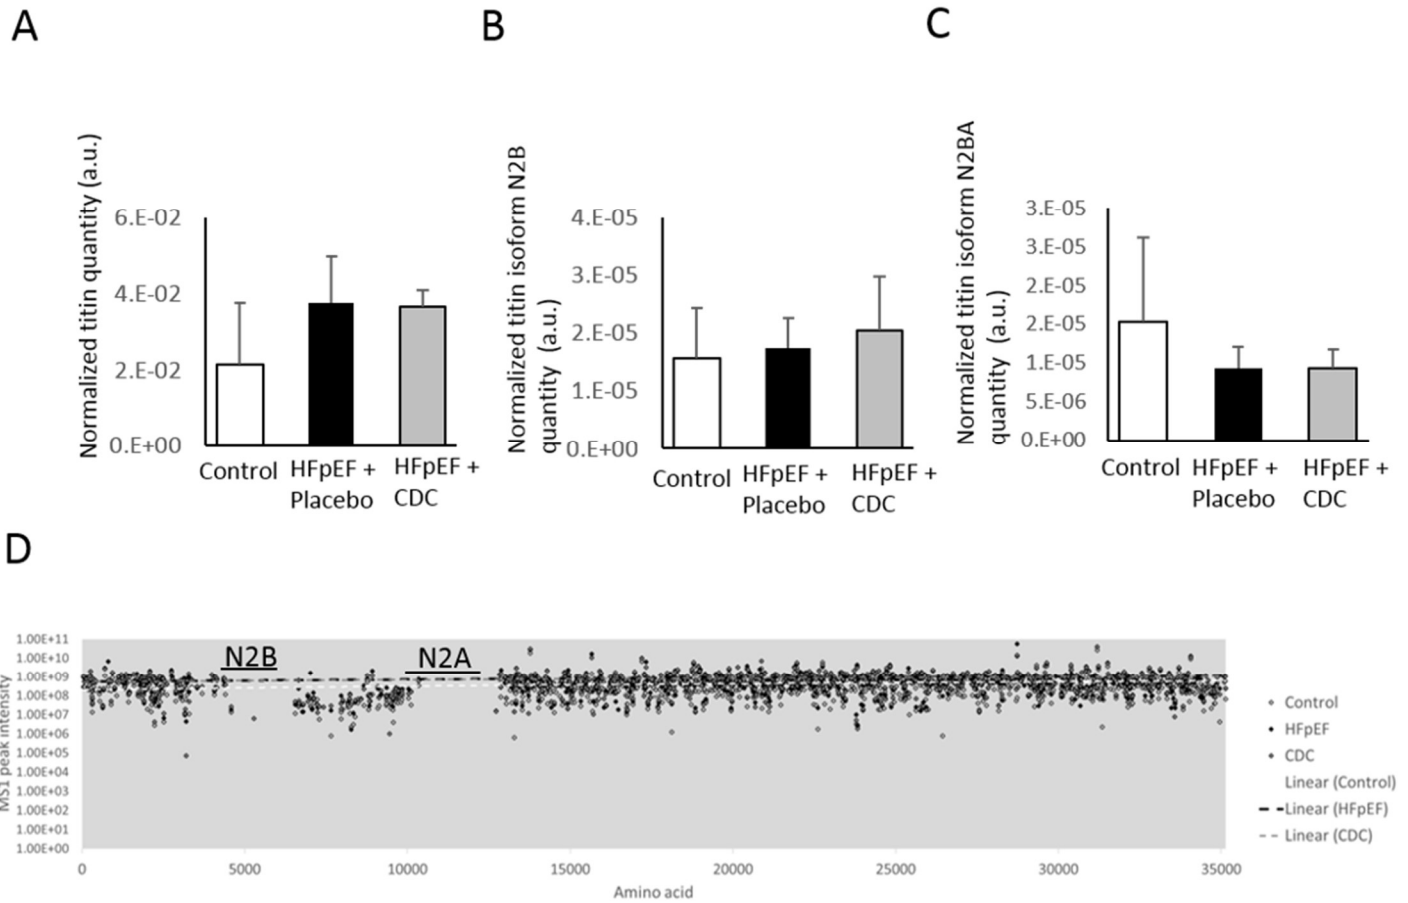

**Supplemental Figure I:** Shown are titin and titin isoforms N2B and N2BA concentration in the hypertrophic induced HFpEF rat model and following its treatment with CDCs. Listed is the averaged MS1 intensity of titin peptides A peptides of titin isoform N2B B, and peptides of titin isoform element N2BA C normalized to total protein signal intensity for control low salt, n=3, HFpEF induced high salt, n=4, and HFpEF treated with CDCs n=4 animal treatment groups. Significant changes weren't detected among treatment groups with three or four biological repeats. In addition, the distribution of individual titin peptide intensity is shown for the three treatment groups and an equal distribution of peptide signal intensity in titin sequence suggests that the protein was not susceptible to degradation.

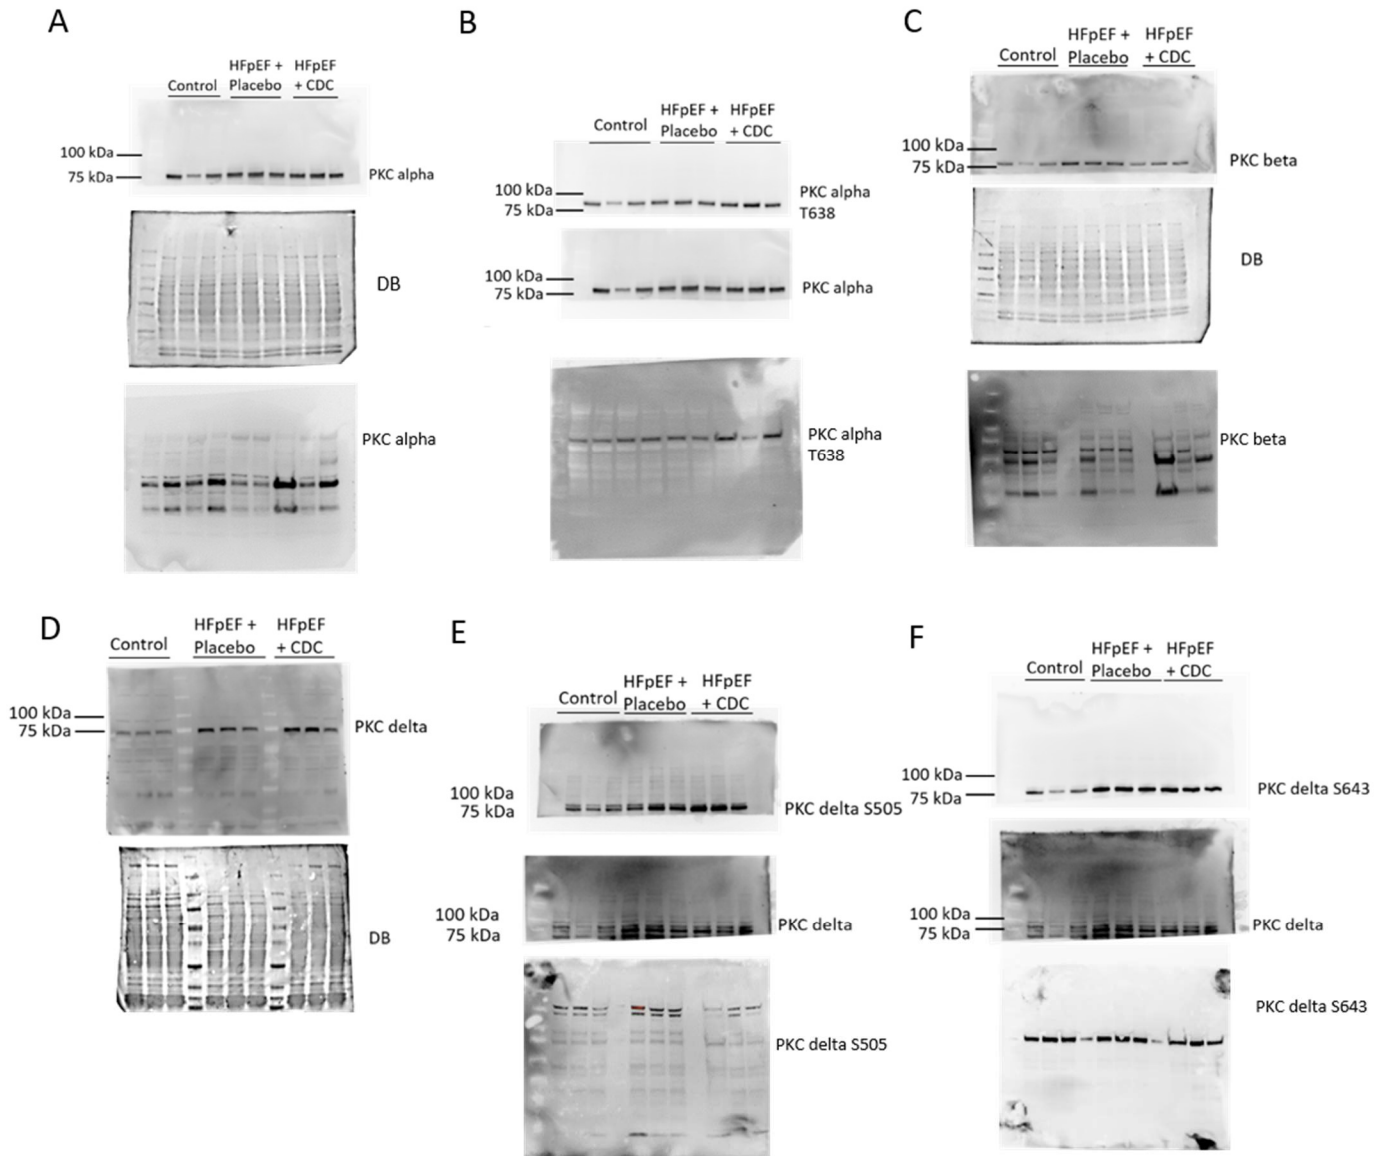

**Supplemental Figure II:** Western blots performed for PKC  $\alpha$  (A),  $\beta$  (C), and  $\delta$  (D) the phosphorylation sites T638 of PKC $\alpha$  (B), S505 (E), and S643 (F) of PKC $\delta$  from the identical LV rat samples used for MS analysis. PKC isoforms were normalized to total protein staining (DB) and PKC isoform modifications were normalized to the equivalent total PKC.
